# Supplementary material for: High-time resolved radon-progeny measurements in the Arctic region (Svalbard Islands, Norway): results and potentialities
Source: Copernicus journal article supplement (doi:10.5194/acp-2017-668), 2017-08-01
Supplement: Supplementary file 1 [file Salzano01.xls]

## Sheet: Rn-Raw
	Date	Short	Long	Const
1	2015-04-29 13:00:00	0.0643393	0.013	0.0476694
2	2015-04-29 14:00:00	0.0394643	0.013	0.118368
3	2015-04-29 15:00:00	0.115065	0.013	0.00803048
4	2015-04-29 16:00:00	0.101573	0.013	0.0432031
5	2015-04-29 17:00:00	0.100573	0.013	0.0072
6	2015-04-29 18:00:00	0.0620753	0.013	0.0072
7	2015-04-29 19:00:00	0.0427663	0.0900648	0.0072
8	2015-04-29 20:00:00	0.0761694	0.013	0.0072
9	2015-04-29 21:00:00	0.104317	0.013	0.0072
10	2015-04-29 22:00:00	0.0273911	0.013	0.0072
11	2015-04-29 23:00:00	0.0578982	0.013	0.0322321
12	2015-04-30	0.087398	0.013	0.0072
13	2015-04-30 01:00:00	0.0904193	0.013	0.0072
14	2015-04-30 02:00:00	0.0754727	0.013	0.0072
15	2015-04-30 03:00:00	0.0826763	0.013	0.0072
16	2015-04-30 04:00:00	0.0524995	0.013	0.0972863
17	2015-04-30 05:00:00	0.0888587	0.013	0.0945984
18	2015-04-30 06:00:00	0.0695072	0.013	0.0072
19	2015-04-30 07:00:00	0.0909752	0.013	0.0072
20	2015-04-30 08:00:00	0.0455186	0.013	0.0072
21	2015-04-30 09:00:00	0.0502321	0.013	0.0072
22	2015-04-30 10:00:00	0.0425308	0.013	0.0284338
23	2015-04-30 11:00:00	0.0924997	0.013	0.0072
24	2015-04-30 12:00:00	0.0577983	0.013	0.0072
25	2015-04-30 13:00:00	0.062478	0.013	0.0072
26	2015-04-30 14:00:00	0.0594355	0.0162538	0.0072
27	2015-04-30 15:00:00	0.0939821	0.013	0.0350752
28	2015-04-30 16:00:00	0.0664804	0.013	0.0072
29	2015-04-30 17:00:00	0.0567435	0.013	0.00796076
30	2015-04-30 18:00:00	0.0953386	0.013	0.0072
31	2015-04-30 19:00:00	0.0416217	0.0546055	0.0072
32	2015-04-30 20:00:00	0.0364559	0.013	0.0107364
33	2015-04-30 21:00:00	0.0472491	0.013	0.0072
34	2015-04-30 22:00:00	0.0619219	0.013	0.0072
35	2015-04-30 23:00:00	0.0796397	0.013	0.0072
36	2015-05-01	0.046283	0.013	0.0072
37	2015-05-01 01:00:00	0.16082	0.013	0.0072
38	2015-05-01 02:00:00	0.0663685	0.013	0.0072
39	2015-05-01 03:00:00	0.0659016	0.0360454	0.0072
40	2015-05-01 04:00:00	0.0768948	0.013	0.0072
41	2015-05-01 05:00:00	0.0787356	0.013	0.0072
42	2015-05-01 06:00:00	0.0660281	0.0227816	0.0072
43	2015-05-01 07:00:00	0.0300254	0.036276	0.0585548
44	2015-05-01 08:00:00	0.0708175	0.013	0.0072
45	2015-05-01 09:00:00	0.0524226	0.013	0.0072
46	2015-05-01 10:00:00	0.0899065	0.013	0.0072
47	2015-05-01 11:00:00	0.172189	0.013	0.0072
48	2015-05-01 12:00:00	0.0757927	0.013	0.0072
49	2015-05-01 13:00:00	0.0614052	0.013	0.0072
50	2015-05-01 14:00:00	0.0475928	0.013	0.0072
51	2015-05-01 15:00:00	0.146926	0.013	0.0121904
52	2015-05-01 16:00:00	0.0477886	0.0171721	0.0127666
53	2015-05-01 17:00:00	0.0553012	0.013	0.0072
54	2015-05-01 18:00:00	0.0538638	0.013	0.0072
55	2015-05-01 19:00:00	0.0927839	0.013	0.0072
56	2015-05-01 20:00:00	0.0615204	0.013	0.0072
57	2015-05-01 21:00:00	0.0123508	0.0615529	0.00817483
58	2015-05-01 22:00:00	0.0323587	0.0421105	0.0072
59	2015-05-01 23:00:00	0.072001	0.013	0.0072
60	2015-05-02	0.0726768	0.013	0.0072
61	2015-05-02 01:00:00	0.0625623	0.013	0.0072
62	2015-05-02 02:00:00	0.322606	0.013	0.0072
63	2015-05-02 03:00:00	0.068521	0.013	0.0072
64	2015-05-02 04:00:00	0.0444879	0.0467708	0.00754695
65	2015-05-02 05:00:00	0.0334528	0.0512481	0.00799893
66	2015-05-02 06:00:00	0.0983512	0.013	0.0072
67	2015-05-02 07:00:00	0.0458226	0.0418003	0.0072
68	2015-05-02 08:00:00	0.152438	0.013	0.0072
69	2015-05-02 09:00:00	0.0515965	0.013	0.0072
70	2015-05-02 10:00:00	0.0879149	0.013	0.0072
71	2015-05-02 11:00:00	0.0418666	0.013	0.0072
72	2015-05-02 12:00:00	0.0609595	0.013	0.0072
73	2015-05-02 13:00:00	0.0542922	0.013	0.0072
74	2015-05-02 14:00:00	0.0572797	0.013	0.0072
75	2015-05-02 15:00:00	0.0605387	0.013	0.0072
76	2015-05-02 16:00:00	0.0316047	0.013	0.0072
77	2015-05-02 17:00:00	0.133721	0.013	0.0114661
78	2015-05-02 18:00:00	0.0394278	0.022186	0.0072
79	2015-05-02 19:00:00	0.0525736	0.013	0.0072
80	2015-05-02 20:00:00	0.187669	0.013	0.0128753
81	2015-05-02 21:00:00	0.0728251	0.013	0.0072
82	2015-05-02 22:00:00	0.0682977	0.013	0.0168665
83	2015-05-02 23:00:00	0.0752578	0.013	0.0072
84	2015-05-03	0.0645948	0.013	0.0072
85	2015-05-03 01:00:00	0.0767289	0.013	0.0072
86	2015-05-03 02:00:00	0.0968084	0.013	0.0072
87	2015-05-03 03:00:00	0.0470034	0.0610153	0.0072
88	2015-05-03 04:00:00	0.0813877	0.013	0.0072
89	2015-05-03 05:00:00	0.106929	0.013	0.0072
90	2015-05-03 06:00:00	0.125645	0.013	0.0072
91	2015-05-03 07:00:00	0.101127	0.013	0.0072
92	2015-05-03 08:00:00	0.122346	0.013	0.0072
93	2015-05-03 09:00:00	0.0603575	0.0183785	0.0072
94	2015-05-03 10:00:00	0.0625192	0.013	0.0072
95	2015-05-03 11:00:00	0.0680013	0.013	0.0072
96	2015-05-03 12:00:00	0.0691599	0.013	0.0072
97	2015-05-03 13:00:00	0.170821	0.013	0.0072
98	2015-05-03 14:00:00	0.0856143	0.013	0.0072
99	2015-05-03 15:00:00	0.0461516	0.0193993	0.0072
100	2015-05-03 16:00:00	0.0395917	0.0347337	0.013192
101	2015-05-03 17:00:00	0.0368232	0.0324072	0.0072
102	2015-05-03 18:00:00	0.17347	0.013	0.017845
103	2015-05-03 19:00:00	0.0931787	0.013	0.0072
104	2015-05-03 20:00:00	0.0836616	0.013	0.0072
105	2015-05-03 21:00:00	0.0222131	0.0227575	0.0072
106	2015-05-03 22:00:00	0.160426	0.013	0.0072
107	2015-05-03 23:00:00	0.03603	0.0498043	0.0072
108	2015-05-04	0.0435523	0.0651925	0.0072
109	2015-05-04 01:00:00	0.104857	0.013	0.0072
110	2015-05-04 02:00:00	0.0723503	0.013	0.0072
111	2015-05-04 03:00:00	0.114301	0.013	0.0072
112	2015-05-04 04:00:00	0.0575436	0.013	0.0072
113	2015-05-04 05:00:00	0.0859779	0.013	0.0072
114	2015-05-04 06:00:00	0.0535011	0.0202948	0.0072
115	2015-05-04 07:00:00	0.0431107	0.013	0.0072
116	2015-05-04 08:00:00	0.0655645	0.013	0.0072
117	2015-05-04 09:00:00	0.0402287	0.0197026	0.0109868
118	2015-05-04 10:00:00	0.0614108	0.013	0.0072
119	2015-05-04 11:00:00	0.0197467	0.0548454	0.0072
120	2015-05-04 12:00:00	0.0786902	0.013	0.0107288
121	2015-05-04 13:00:00	0.0560147	0.013	0.0072
122	2015-05-04 14:00:00	0.045392	0.0366098	0.0072
123	2015-05-04 15:00:00	0.0719877	0.013	0.0072
124	2015-05-04 16:00:00	0.0780259	0.013	0.0072
125	2015-05-04 17:00:00	0.0579694	0.013	0.0072
126	2015-05-04 18:00:00	0.109263	0.013	0.0072
127	2015-05-04 19:00:00	0.144994	0.013	0.0072
128	2015-05-04 20:00:00	0.0473604	0.013	0.0072
129	2015-05-04 21:00:00	0.0379219	0.013	0.0072
130	2015-05-04 22:00:00	0.0417598	0.013	0.0072
131	2015-05-04 23:00:00	0.193274	0.013	0.0072
132	2015-05-05	0.0538708	0.013	0.0072
133	2015-05-05 01:00:00	0.0586634	0.013	0.0072
134	2015-05-05 02:00:00	0.042022	0.0257201	0.0072
135	2015-05-05 03:00:00	0.0885618	0.013	0.0072
136	2015-05-05 04:00:00	0.14628	0.013	0.0072
137	2015-05-05 05:00:00	0.0761883	0.013	0.009106
138	2015-05-05 06:00:00	0.0262802	0.013	0.0072
139	2015-05-05 07:00:00	0.0263317	0.013	0.0072
140	2015-05-05 08:00:00	0.102819	0.013	0.0072
141	2015-05-05 09:00:00	0.118365	0.013	0.0072
142	2015-05-05 10:00:00	0.0501672	0.013	0.0072
143	2015-05-05 11:00:00	0.0398865	0.013	0.0072
144	2015-05-05 12:00:00	0.0327085	0.0162736	0.0072
145	2015-05-05 13:00:00	0.0709878	0.013	0.0072
146	2015-05-05 14:00:00	0.0528902	0.013	0.0072
147	2015-05-05 15:00:00	0.0477285	0.013	0.0072
148	2015-05-05 16:00:00	0.175323	0.013	0.0072
149	2015-05-05 17:00:00	0.0503904	0.013	0.0072
150	2015-05-05 18:00:00	0.0724597	0.013	0.0072
151	2015-05-05 19:00:00	0.0314383	0.0457434	0.0072
152	2015-05-05 20:00:00	0.0821776	0.013	0.0072
153	2015-05-05 21:00:00	0.176278	0.013	0.0072
154	2015-05-05 22:00:00	0.0307812	0.0366669	0.0154321
155	2015-05-05 23:00:00	0.136701	0.013	0.0072
156	2015-05-06	0.0667118	0.013	0.0072
157	2015-05-06 01:00:00	0.271565	0.013	0.0072
158	2015-05-06 02:00:00	0.181437	0.013	0.0072
159	2015-05-06 03:00:00	0.0484418	0.013	0.00800895
160	2015-05-06 04:00:00	0.0503827	0.013	0.0072
161	2015-05-06 05:00:00	0.126337	0.013	0.0072
162	2015-05-06 06:00:00	0.0781895	0.013	0.0072
163	2015-05-06 07:00:00	0.0236031	0.0323832	0.0072
164	2015-05-06 08:00:00	0.0446461	0.013	0.0072
165	2015-05-06 09:00:00	0.0942655	0.013	0.0072
166	2015-05-06 10:00:00	0.106562	0.013	0.0072
167	2015-05-06 11:00:00	0.0347614	0.013	0.0072
168	2015-05-06 12:00:00	0.0423096	0.013	0.0072
169	2015-05-06 13:00:00	0.0295751	0.013	0.0072
170	2015-05-06 14:00:00	0.036904	0.013	0.0072
171	2015-05-06 15:00:00	0.0487999	0.013	0.0072
172	2015-05-06 16:00:00	0.040028	0.013	0.0072
173	2015-05-06 17:00:00	0.0384386	0.013	0.0072
174	2015-05-06 18:00:00	0.0539211	0.013	0.0072
175	2015-05-06 19:00:00	0.0516727	0.013	0.0072
176	2015-05-06 20:00:00	0.033268	0.013	0.0189699
177	2015-05-06 21:00:00	0.021739	0.013	0.0072
178	2015-05-06 22:00:00	0.0457745	0.013	0.0072
179	2015-05-06 23:00:00	0.0116342	0.013	0.0142755
180	2015-05-07	0.0425352	0.013	0.0072
181	2015-05-07 01:00:00	0.0626083	0.013	0.0072
182	2015-05-07 02:00:00	0.091894	0.013	0.0109096
183	2015-05-07 03:00:00	0.00579561	0.013	0.0072
184	2015-05-07 04:00:00	0.04088	0.013	0.0072
185	2015-05-07 05:00:00	0.0530339	0.013	0.0072
186	2015-05-07 06:00:00	0.0397034	0.013	0.0072
187	2015-05-07 07:00:00	0.101795	0.013	0.0072
188	2015-05-07 08:00:00	0.0458198	0.013	0.0072
189	2015-05-07 09:00:00	0.0721889	0.013	0.0284555
190	2015-05-07 10:00:00	0.176514	0.013	0.0072
191	2015-05-07 11:00:00	0.0278485	0.0364489	0.0072
192	2015-05-07 12:00:00	0.0650391	0.013	0.0072
193	2015-05-07 13:00:00	0.0454444	0.013	0.0072
194	2015-05-07 14:00:00	0.0918493	0.013	0.0072
195	2015-05-07 15:00:00	0.032223	0.013	0.0072
196	2015-05-07 16:00:00	0.0458098	0.013	0.0072
197	2015-05-07 17:00:00	0.0685929	0.013	0.0072
198	2015-05-07 18:00:00	0.0690019	0.013	0.0072
199	2015-05-07 19:00:00	0.0499353	0.013	0.0072
200	2015-05-07 20:00:00	0.101468	0.013	0.0109016
201	2015-05-07 21:00:00	0.0530578	0.013	0.0161968
202	2015-05-07 22:00:00	0.0488864	0.013	0.0072
203	2015-05-07 23:00:00	0.0637383	0.013	0.0072
204	2015-05-08	0.159409	0.013	0.0072
205	2015-05-08 01:00:00	0.0200788	0.013	0.0072
206	2015-05-08 02:00:00	0.160986	0.013	0.0072
207	2015-05-08 03:00:00	0.0600511	0.013	0.00954209
208	2015-05-08 04:00:00	0.0306949	0.013	0.0072
209	2015-05-08 05:00:00	0.0338252	0.013	0.0072
210	2015-05-08 06:00:00	0.0431502	0.013	0.0072
211	2015-05-08 07:00:00	0.103445	0.013	0.0072
212	2015-05-08 08:00:00	0.01374	0.013	0.0072
213	2015-05-08 09:00:00	0.041033	0.013	0.0072
214	2015-05-08 10:00:00	0.0560821	0.013	0.0072
215	2015-05-08 11:00:00	0.00523439	0.0226612	0.0072
216	2015-05-08 12:00:00	0.13971	0.013	0.0072
217	2015-05-08 13:00:00	0.031923	0.013	0.0072
218	2015-05-08 14:00:00	0.0410965	0.013	0.0072
219	2015-05-08 15:00:00	0.0399068	0.013	0.0072
220	2015-05-08 16:00:00	0.0236695	0.0361188	0.0072
221	2015-05-08 17:00:00	0.0368952	0.013	0.0072
222	2015-05-08 18:00:00	0.0316173	0.0155648	0.0072
223	2015-05-08 19:00:00	0.0814812	0.013	0.0072
224	2015-05-08 20:00:00	0.0920521	0.013	0.0072
225	2015-05-08 21:00:00	0.0133972	0.013	0.0072
226	2015-05-08 22:00:00	0.0163077	0.0456713	0.0072
227	2015-05-08 23:00:00	0.0598053	0.013	0.0072
228	2015-05-09	0.106647	0.013	0.0072
229	2015-05-09 01:00:00	0.04018	0.013	0.0072
230	2015-05-09 02:00:00	0.0534131	0.013	0.0072
231	2015-05-09 03:00:00	0.240965	0.013	0.0072
232	2015-05-09 04:00:00	0.0505853	0.013	0.0072
233	2015-05-09 05:00:00	0.0402746	0.013	0.0072
234	2015-05-09 06:00:00	0.0586116	0.013	0.0072
235	2015-05-09 07:00:00	0.055487	0.013	0.0072
236	2015-05-09 08:00:00	0.0489697	0.013	0.0072
237	2015-05-09 09:00:00	0.0563894	0.013	0.0072
238	2015-05-09 10:00:00	0.0261105	0.0310896	0.00757014
239	2015-05-09 11:00:00	0.115423	0.013	0.0072
240	2015-05-09 12:00:00	0.0682789	0.013	0.0072
241	2015-05-09 13:00:00	0.0647522	0.013	0.0072
242	2015-05-09 14:00:00	0.168074	0.013	0.0072
243	2015-05-09 15:00:00	0.0919355	0.013	0.0072
244	2015-05-09 16:00:00	0.0387623	0.0633168	0.0072
245	2015-05-09 17:00:00	0.0807833	0.013	0.0072
246	2015-05-09 18:00:00	0.180363	0.013	0.0072
247	2015-05-09 19:00:00	0.0649003	0.013	0.0072
248	2015-05-09 20:00:00	0.0347929	0.0364903	0.0072
249	2015-05-09 21:00:00	0.0532451	0.013	0.0072
250	2015-05-09 22:00:00	0.0427589	0.0323365	0.0072
251	2015-05-09 23:00:00	0.058039	0.013	0.0072
252	2015-05-10	0.163683	0.013	0.0072
253	2015-05-10 01:00:00	0.0819761	0.013	0.0166314
254	2015-05-10 02:00:00	0.0176935	0.0554297	0.0072
255	2015-05-10 03:00:00	0.154034	0.013	0.0072
256	2015-05-10 04:00:00	0.161009	0.013	0.0131744
257	2015-05-10 05:00:00	0.0409669	0.013	0.0072
258	2015-05-10 06:00:00	0.0805921	0.013	0.0072
259	2015-05-10 07:00:00	0.0383711	0.024024	0.0072
260	2015-05-10 08:00:00	0.146439	0.013	0.0072
261	2015-05-10 09:00:00	0.0534567	0.013	0.0072
262	2015-05-10 10:00:00	0.0390361	0.0354896	0.0072
263	2015-05-10 11:00:00	0.0521181	0.013	0.0072
264	2015-05-10 12:00:00	0.0657686	0.013	0.0072
265	2015-05-10 13:00:00	0.0335266	0.0491115	0.00816682
266	2015-05-10 14:00:00	0.0404666	0.013	0.0072
267	2015-05-10 15:00:00	0.0362856	0.0289623	0.0072
268	2015-05-10 16:00:00	0.258876	0.013	0.0072
269	2015-05-10 17:00:00	0.242086	0.013	0.0072
270	2015-05-10 18:00:00	0.0794614	0.013	0.0072
271	2015-05-10 19:00:00	0.249038	0.013	0.0072
272	2015-05-10 20:00:00	0.0389545	0.0477973	0.0072
273	2015-05-10 21:00:00	0.0275405	0.0548945	0.0072
274	2015-05-10 22:00:00	0.0601554	0.0308762	0.00956908
275	2015-05-10 23:00:00	0.033737	0.0705158	0.0072
276	2015-05-11	0.0920906	0.013	0.0072
277	2015-05-11 01:00:00	0.0327103	0.0436597	0.0072
278	2015-05-11 02:00:00	0.207469	0.013	0.0072
279	2015-05-11 03:00:00	0.0900486	0.013	0.0072
280	2015-05-11 04:00:00	0.0680741	0.0708042	0.0072
281	2015-05-11 05:00:00	0.0283581	0.0359871	0.0072
282	2015-05-11 06:00:00	0.0151172	0.0685008	0.0072
283	2015-05-11 07:00:00	0.0808337	0.013	0.0072
284	2015-05-11 08:00:00	0.0699869	0.013	0.0072
285	2015-05-11 09:00:00	0.082165	0.013	0.0072
286	2015-05-11 10:00:00	0.0493675	0.0696075	0.0072
287	2015-05-11 11:00:00	0.0592611	0.0215478	0.0078233
288	2015-05-11 12:00:00	0.154347	0.013	0.0072
289	2015-05-11 13:00:00	0.0128202	0.0546588	0.0072
290	2015-05-11 14:00:00	0.120073	0.013	0.0072
291	2015-05-11 15:00:00	0.147679	0.013	0.0072
292	2015-05-11 16:00:00	0.286488	0.013	0.0072
293	2015-05-11 17:00:00	0.0481984	0.013	0.0072
294	2015-05-11 18:00:00	0.0318773	0.0500537	0.0072
295	2015-05-11 19:00:00	0.149871	0.013	0.0072
296	2015-05-11 20:00:00	0.0390803	0.0470111	0.0072
297	2015-05-11 21:00:00	0.132192	0.013	0.0143459
298	2015-05-11 22:00:00	0.0230736	0.0323913	0.0072
299	2015-05-11 23:00:00	0.0252042	0.0420219	0.0072
300	2015-05-12	0.161634	0.013	0.0072
301	2015-05-12 01:00:00	0.0657683	0.013	0.0072
302	2015-05-12 02:00:00	0.114152	0.013	0.0072
303	2015-05-12 03:00:00	0.0499098	0.0379014	0.0072
304	2015-05-12 04:00:00	0.0778722	0.0224552	0.0072
305	2015-05-12 05:00:00	0.0970245	0.013	0.0072
306	2015-05-12 06:00:00	0.137539	0.013	0.00960071
307	2015-05-12 07:00:00	0.102691	0.013	0.0072
308	2015-05-12 08:00:00	0.118602	0.013	0.0072
309	2015-05-12 09:00:00	0.0572567	0.013	0.0125743
310	2015-05-12 10:00:00	0.0885698	0.013	0.0072
311	2015-05-12 11:00:00	0.0923916	0.013	0.0072
312	2015-05-12 12:00:00	0.0306661	0.0512284	0.00736031
313	2015-05-12 13:00:00	0.046174	0.0597112	0.0072
314	2015-05-12 14:00:00	0.161725	0.013	0.0082433
315	2015-05-12 15:00:00	0.150634	0.013	0.0117875
316	2015-05-12 16:00:00	0.160145	0.013	0.0072
317	2015-05-12 17:00:00	0.074771	0.013	0.0072
318	2015-05-12 18:00:00	0.0913956	0.013	0.0072
319	2015-05-12 19:00:00	0.23536	0.013	0.0072
320	2015-05-12 20:00:00	0.037591	0.0798688	0.0072
321	2015-05-12 21:00:00	0.0855424	0.013	0.0072
322	2015-05-12 22:00:00	0.0791437	0.013	0.0072
323	2015-05-12 23:00:00	0.169259	0.013	0.0072
324	2015-05-13	0.12848	0.013	0.0072
325	2015-05-13 01:00:00	0.104159	0.013	0.0072
326	2015-05-13 02:00:00	0.103279	0.031207	0.0072
327	2015-05-13 03:00:00	0.108041	0.0304824	0.0072
328	2015-05-13 04:00:00	0.125772	0.013	0.0072
329	2015-05-13 05:00:00	0.130605	0.013	0.0072
330	2015-05-13 06:00:00	0.244752	0.013	0.0072
331	2015-05-13 07:00:00	0.104825	0.0181745	0.0072
332	2015-05-13 08:00:00	0.109038	0.013	0.0072
333	2015-05-13 09:00:00	0.0574719	0.0235515	0.0114242
334	2015-05-13 10:00:00	0.0962357	0.013	0.00751144
335	2015-05-13 11:00:00	0.087305	0.013	0.0072
336	2015-05-13 12:00:00	0.0449825	0.0831224	0.0108855
337	2015-05-13 13:00:00	0.163473	0.013	0.0072
338	2015-05-13 14:00:00	0.0903089	0.013	0.0072
339	2015-05-13 15:00:00	0.11088	0.013	0.0072
340	2015-05-13 16:00:00	0.195901	0.013	0.0072
341	2015-05-13 17:00:00	0.0736081	0.0170286	0.0072
342	2015-05-13 18:00:00	0.0796718	0.0286106	0.0072
343	2015-05-13 19:00:00	0.0859216	0.013	0.00825518
344	2015-05-13 20:00:00	0.0968352	0.013	0.0072
345	2015-05-13 21:00:00	0.0779634	0.013	0.0072
346	2015-05-13 22:00:00	0.086682	0.013	0.0072
347	2015-05-13 23:00:00	0.288599	0.013	0.0072
348	2015-05-14	0.0908786	0.013	0.0072
349	2015-05-14 01:00:00	0.0893733	0.013	0.0072
350	2015-05-14 02:00:00	0.0582239	0.0967068	0.0072
351	2015-05-14 03:00:00	0.233807	0.013	0.0072
352	2015-05-14 04:00:00	0.111651	0.013	0.0072
353	2015-05-14 05:00:00	0.0343351	0.075325	0.0072
354	2015-05-14 06:00:00	0.0978682	0.013	0.0072
355	2015-05-14 07:00:00	0.0222667	0.108673	0.0072
356	2015-05-14 08:00:00	0.0767806	0.013	0.0072
357	2015-05-14 09:00:00	0.0824981	0.013	0.0072
358	2015-05-14 10:00:00	0.14608	0.013	0.0072
359	2015-05-14 11:00:00	0.0751215	0.013	0.0072
360	2015-05-14 12:00:00	0.0604021	0.013	0.0072
361	2015-05-14 13:00:00	0.0789244	0.013	0.0072
362	2015-05-14 14:00:00	0.0303451	0.0311432	0.0072
363	2015-05-14 15:00:00	0.0421181	0.013	0.0072
364	2015-05-14 16:00:00	0.0540569	0.013	0.0072
365	2015-05-14 17:00:00	0.159445	0.013	0.0149658
366	2015-05-14 18:00:00	0.0711233	0.013	0.0072
367	2015-05-14 19:00:00	0.0807897	0.013	0.0072
368	2015-05-14 20:00:00	0.0536944	0.013	0.01779
369	2015-05-14 21:00:00	0.0366264	0.031011	0.0072
370	2015-05-14 22:00:00	0.0323985	0.013	0.0072
371	2015-05-14 23:00:00	0.0933671	0.013	0.0109663
372	2015-05-15	0.0442737	0.013	0.0072
373	2015-05-15 01:00:00	0.0838011	0.013	0.0072
374	2015-05-15 02:00:00	0.143038	0.013	0.00793623
375	2015-05-15 03:00:00	0.0617518	0.013	0.0072
376	2015-05-15 04:00:00	0.0743729	0.013	0.0147691
377	2015-05-15 05:00:00	0.0458883	0.013	0.0072
378	2015-05-15 06:00:00	0.0688698	0.013	0.0072
379	2015-05-15 07:00:00	0.0353655	0.0338261	0.0072
380	2015-05-15 08:00:00	0.0465717	0.013	0.0072
381	2015-05-15 09:00:00	0.0560186	0.013	0.0072
382	2015-05-15 10:00:00	0.0535669	0.0195215	0.0072
383	2015-05-15 11:00:00	0.198575	0.013	0.0072
384	2015-05-15 12:00:00	0.0444739	0.013	0.0072
385	2015-05-15 13:00:00	0.0684141	0.013	0.0072
386	2015-05-15 14:00:00	0.0236277	0.042292	0.0072
387	2015-05-15 15:00:00	0.0643251	0.013	0.0072
388	2015-05-15 16:00:00	0.0252326	0.0192277	0.0072
389	2015-05-15 17:00:00	0.0754967	0.013	0.0128576
390	2015-05-15 18:00:00	0.0816825	0.013	0.0072
391	2015-05-15 19:00:00	0.0406614	0.013	0.0072
392	2015-05-15 20:00:00	0.0144357	0.013	0.0072
393	2015-05-15 21:00:00	0.0977517	0.013	0.0072
394	2015-05-15 22:00:00	0.141858	0.013	0.0072
395	2015-05-15 23:00:00	0.164295	0.013	0.0072
396	2015-05-16	0.0492335	0.013	0.0072
397	2015-05-16 01:00:00	0.00891531	0.0318958	0.0072
398	2015-05-16 02:00:00	0.0448832	0.013	0.0072
399	2015-05-16 03:00:00	0.0443769	0.013	0.0072
400	2015-05-16 04:00:00	0.117885	0.013	0.0072
401	2015-05-16 05:00:00	0.00494431	0.0150695	0.0072
402	2015-05-16 06:00:00	0.00732495	0.0365055	0.0072
403	2015-05-16 07:00:00	0.060043	0.013	0.0072
404	2015-05-16 08:00:00	0.00777207	0.013	0.0072
405	2015-05-16 09:00:00	0.0796021	0.013	0.0072
406	2015-05-16 10:00:00	0.127881	0.013	0.0072
407	2015-05-16 11:00:00	0.0443911	0.013	0.0072
408	2015-05-16 12:00:00	0.0056504	0.013	0.0072
409	2015-05-16 13:00:00	0.0115482	0.013	0.0072
410	2015-05-16 14:00:00	0.201123	0.013	0.0072
411	2015-05-16 15:00:00	0.0116375	0.013	0.0072
412	2015-05-16 16:00:00	0.0827833	0.013	0.015185
413	2015-05-16 17:00:00	0.00778304	0.013	0.0072
414	2015-05-16 18:00:00	0.256813	0.013	0.0072
415	2015-05-16 19:00:00	0.0513227	0.013	0.0072
416	2015-05-16 20:00:00	0.0193602	0.0606099	0.0072
417	2015-05-16 21:00:00	0.088551	0.013	0.0072
418	2015-05-16 22:00:00	0.0696799	0.013	0.0072
419	2015-05-16 23:00:00	0.0891644	0.013	0.0072
420	2015-05-17	0.0220127	0.013	0.0072
421	2015-05-17 01:00:00	0.0855135	0.013	0.0139231
422	2015-05-17 02:00:00	0.042761	0.013	0.0072
423	2015-05-17 03:00:00	0.0217526	0.0363475	0.0072
424	2015-05-17 04:00:00	0.040171	0.013	0.0072
425	2015-05-17 05:00:00	0.0113165	0.0249577	0.0072
426	2015-05-17 06:00:00	0.0511214	0.013	0.0072
427	2015-05-17 07:00:00	0.0225449	0.0214166	0.0072
428	2015-05-17 08:00:00	0.0286518	0.013	0.0072
429	2015-05-17 09:00:00	0.054298	0.013	0.0072
430	2015-05-17 10:00:00	0.0338179	0.0200753	0.00900717
431	2015-05-17 11:00:00	0.15115	0.013	0.0072
432	2015-05-17 12:00:00	0.140031	0.013	0.0072
433	2015-05-17 13:00:00	0.0259867	0.013	0.0072
434	2015-05-17 14:00:00	0.0410491	0.013	0.0072
435	2015-05-17 15:00:00	0.0537572	0.013	0.0072
436	2015-05-17 16:00:00	0.0358038	0.013	0.0072
437	2015-05-17 17:00:00	0.0277527	0.013	0.0072
438	2015-05-17 18:00:00	0.024172	0.0355971	0.0072
439	2015-05-17 19:00:00	0.0359583	0.013	0.0072
440	2015-05-17 20:00:00	0.0111751	0.013	0.0072
441	2015-05-17 21:00:00	0.0126853	0.0210663	0.0072
442	2015-05-17 22:00:00	0.0313528	0.0149894	0.0072
443	2015-05-17 23:00:00	0.0866897	0.013	0.0072
444	2015-05-18	0.125953	0.013	0.0072
445	2015-05-18 01:00:00	0.0342055	0.013	0.0072
446	2015-05-18 02:00:00	0.139207	0.013	0.0072
447	2015-05-18 03:00:00	0.068568	0.013	0.0072
448	2015-05-18 04:00:00	0.174209	0.013	0.0072
449	2015-05-18 05:00:00	0.0207609	0.013	0.0072
450	2015-05-18 06:00:00	0.019264	0.0381963	0.0072
451	2015-05-18 07:00:00	0.0427705	0.013	0.0072
452	2015-05-18 08:00:00	0.126637	0.013	0.0072
453	2015-05-18 09:00:00	0.11188	0.013	0.00724483
454	2015-05-18 10:00:00	0.211465	0.013	0.0072
455	2015-05-18 11:00:00	0.143329	0.013	0.0072
456	2015-05-18 12:00:00	0.0245082	0.0253346	0.0072
457	2015-05-18 13:00:00	0.0533141	0.013	0.0072
458	2015-05-18 14:00:00	0.266983	0.013	0.0072
459	2015-05-18 15:00:00	0.0534051	0.013	0.0072
460	2015-05-18 16:00:00	0.0245907	0.013	0.0072
461	2015-05-18 17:00:00	0.0120571	0.0279433	0.0072
462	2015-05-18 18:00:00	0.140547	0.013	0.0072
463	2015-05-18 19:00:00	0.0262048	0.013	0.0072
464	2015-05-18 20:00:00	0.0153843	0.013	0.0072
465	2015-05-18 21:00:00	0.108793	0.013	0.0072
466	2015-05-18 22:00:00	0.0274734	0.0326278	0.0072
467	2015-05-18 23:00:00	0.0526283	0.013	0.0072
468	2015-05-19	0.0342198	0.0175039	0.0072
469	2015-05-19 01:00:00	0.0747712	0.013	0.0072
470	2015-05-19 02:00:00	0.202612	0.013	0.0072
471	2015-05-19 03:00:00	0.029657	0.049826	0.00810314
472	2015-05-19 04:00:00	0.0176171	0.013	0.0210713
473	2015-05-19 05:00:00	0.0403922	0.013	0.0072
474	2015-05-19 06:00:00	0.212619	0.013	0.0072
475	2015-05-19 07:00:00	0.0509307	0.013	0.0072
476	2015-05-19 08:00:00	0.0377664	0.013	0.0072
477	2015-05-19 09:00:00	0.0220739	0.0333169	0.0072
478	2015-05-19 10:00:00	0.159381	0.013	0.0072
479	2015-05-19 11:00:00	0.0294875	0.0142889	0.0072
480	2015-05-19 12:00:00	0.00879741	0.013	0.0098139
481	2015-05-19 13:00:00	0.0342776	0.013	0.0072
482	2015-05-19 14:00:00	0.223036	0.013	0.0072
483	2015-05-19 15:00:00	0.0561821	0.013	0.0072
484	2015-05-19 16:00:00	0.00996004	0.013	0.0072
485	2015-05-19 17:00:00	0.0248275	0.013	0.0072
486	2015-05-19 18:00:00	0.0735718	0.013	0.0072
487	2015-05-19 19:00:00	0.0420768	0.013	0.0072
488	2015-05-19 20:00:00	0.0234163	0.013	0.0072
489	2015-05-19 21:00:00	0.0255759	0.013	0.0072
490	2015-05-19 22:00:00	0.100178	0.013	0.0072
491	2015-05-19 23:00:00	0.0260332	0.013	0.0072
492	2015-05-20	0.0153491	0.0333154	0.0072
493	2015-05-20 01:00:00	0.0307662	0.013	0.0072
494	2015-05-20 02:00:00	0.225826	0.013	0.0072
495	2015-05-20 03:00:00	0.0268327	0.013	0.0380227
496	2015-05-20 04:00:00	0.0894881	0.013	0.0072
497	2015-05-20 05:00:00	0.0253479	0.013	0.0072
498	2015-05-20 06:00:00	0.0503884	0.013	0.0072
499	2015-05-20 07:00:00	0.0430611	0.013	0.0072
500	2015-05-20 08:00:00	0.0218135	0.013	0.0072
501	2015-05-20 09:00:00	0.0995465	0.013	0.0380178
502	2015-05-20 10:00:00	0.181491	0.013	0.0072
503	2015-05-20 11:00:00	0.0300287	0.013	0.0072
504	2015-05-20 12:00:00	0.0276875	0.013	0.0109139
505	2015-05-20 13:00:00	0.0622	0.013	0.0072
506	2015-05-20 14:00:00	0.177448	0.013	0.0072
507	2015-05-20 15:00:00	0.0222544	0.0330592	0.0072
508	2015-05-20 16:00:00	0.0867289	0.013	0.0072
509	2015-05-20 17:00:00	0.0178468	0.0259893	0.0072
510	2015-05-20 18:00:00	0.143175	0.013	0.0072
511	2015-05-20 19:00:00	0.0243172	0.0171409	0.0072
512	2015-05-20 20:00:00	0.0300538	0.018136	0.0072
513	2015-05-20 21:00:00	0.0540488	0.013	0.0072
514	2015-05-20 22:00:00	0.0607724	0.013	0.0072
515	2015-05-20 23:00:00	0.0571689	0.013	0.0072
516	2015-05-21	0.132001	0.013	0.0072
517	2015-05-21 01:00:00	0.201435	0.013	0.0072
518	2015-05-21 02:00:00	0.215679	0.013	0.0072
519	2015-05-21 03:00:00	0.0516842	0.013	0.0072
520	2015-05-21 04:00:00	0.027756	0.0611495	0.0072
521	2015-05-21 05:00:00	0.0668488	0.018286	0.0072
522	2015-05-21 06:00:00	0.0671115	0.0271196	0.0072
523	2015-05-21 07:00:00	0.0704877	0.013	0.014209
524	2015-05-21 08:00:00	0.0659483	0.013	0.0072
525	2015-05-21 09:00:00	0.0567756	0.013	0.0072
526	2015-05-21 10:00:00	0.265536	0.013	0.0072
527	2015-05-21 11:00:00	0.0583362	0.013	0.0072
528	2015-05-21 12:00:00	0.0481287	0.013	0.0072
529	2015-05-21 13:00:00	0.0827445	0.013	0.0072
530	2015-05-21 14:00:00	0.0557048	0.0707985	0.0072
531	2015-05-21 15:00:00	0.0828898	0.0131636	0.0072
532	2015-05-21 16:00:00	0.0920584	0.013	0.0072
533	2015-05-21 17:00:00	0.0849154	0.013	0.0072
534	2015-05-21 18:00:00	0.0734761	0.013	0.0072
535	2015-05-21 19:00:00	0.11221	0.013	0.0072
536	2015-05-21 20:00:00	0.154984	0.013	0.0114975
537	2015-05-21 21:00:00	0.0651146	0.013	0.0072
538	2015-05-21 22:00:00	0.0963874	0.013	0.0072
539	2015-05-21 23:00:00	0.0761357	0.013	0.0072
540	2015-05-22	0.11562	0.013	0.0072
541	2015-05-22 01:00:00	0.0845525	0.013	0.0072
542	2015-05-22 02:00:00	0.0446433	0.0632773	0.0072
543	2015-05-22 03:00:00	0.0894839	0.013	0.00986534
544	2015-05-22 04:00:00	0.0688773	0.013	0.0072
545	2015-05-22 05:00:00	0.0823957	0.013	0.0072
546	2015-05-22 06:00:00	0.130965	0.013	0.0072
547	2015-05-22 07:00:00	0.167308	0.013	0.0072
548	2015-05-22 08:00:00	0.092962	0.013	0.0072
549	2015-05-22 09:00:00	0.0406081	0.013	0.0072
550	2015-05-22 10:00:00	0.0168784	0.0571625	0.0072
551	2015-05-22 11:00:00	0.166474	0.013	0.0072
552	2015-05-22 12:00:00	0.0589196	0.013	0.0072
553	2015-05-22 13:00:00	0.0336074	0.013	0.00976733
554	2015-05-22 14:00:00	0.150132	0.013	0.0072
555	2015-05-22 15:00:00	0.0427019	0.013	0.0072
556	2015-05-22 16:00:00	0.0187735	0.013	0.0072
557	2015-05-22 17:00:00	0.0595592	0.013	0.0175309
558	2015-05-22 18:00:00	0.202923	0.013	0.0072
559	2015-05-22 19:00:00	0.0133538	0.013	0.0072
560	2015-05-22 20:00:00	0.0035	0.013	0.0072
561	2015-05-22 21:00:00	0.0279269	0.013	0.0072
562	2015-05-22 22:00:00	#N/A	#N/A	#N/A
563	2015-05-22 23:00:00	#N/A	#N/A	#N/A
564	2015-05-23	#N/A	#N/A	#N/A
565	2015-05-23 01:00:00	#N/A	#N/A	#N/A
566	2015-05-23 02:00:00	#N/A	#N/A	#N/A
567	2015-05-23 03:00:00	#N/A	#N/A	#N/A
568	2015-05-23 04:00:00	0.03792	0.013	0.0072
569	2015-05-23 05:00:00	0.059936	0.013	0.0080966
570	2015-05-23 06:00:00	0.150721	0.013	0.0105534
571	2015-05-23 07:00:00	0.208203	0.013	0.0076991
572	2015-05-23 08:00:00	0.0573986	0.013	0.0072
573	2015-05-23 09:00:00	0.0572106	0.013	0.0072
574	2015-05-23 10:00:00	0.12834	0.013	0.0072
575	2015-05-23 11:00:00	0.0613609	0.013	0.0072
576	2015-05-23 12:00:00	0.0229933	0.013	0.0307111
577	2015-05-23 13:00:00	0.0622722	0.013	0.0072
578	2015-05-23 14:00:00	0.241068	0.013	0.0072
579	2015-05-23 15:00:00	0.0803701	0.013	0.0072
580	2015-05-23 16:00:00	0.0118859	0.0207916	0.0072
581	2015-05-23 17:00:00	0.0601538	0.013	0.0072
582	2015-05-23 18:00:00	0.342524	0.013	0.0072
583	2015-05-23 19:00:00	0.0478855	0.013	0.0072
584	2015-05-23 20:00:00	0.0363155	0.013	0.0072
585	2015-05-23 21:00:00	0.0650045	0.013	0.0072
586	2015-05-23 22:00:00	0.254581	0.013	0.0072
587	2015-05-23 23:00:00	0.0455923	0.013	0.0072
588	2015-05-24	0.0464277	0.013	0.00776123
589	2015-05-24 01:00:00	0.152799	0.013	0.0127682
590	2015-05-24 02:00:00	0.0599014	0.0723759	0.0072
591	2015-05-24 03:00:00	0.0625782	0.0335544	0.0072
592	2015-05-24 04:00:00	0.0216756	0.0536345	0.0072
593	2015-05-24 05:00:00	0.0530795	0.0543265	0.0072
594	2015-05-24 06:00:00	0.0996682	0.013	0.0072
595	2015-05-24 07:00:00	0.0351357	0.0631651	0.0072
596	2015-05-24 08:00:00	0.0755161	0.013	0.0072
597	2015-05-24 09:00:00	0.0647467	0.013	0.0072
598	2015-05-24 10:00:00	0.0423078	0.0262734	0.0072
599	2015-05-24 11:00:00	0.0768546	0.013	0.0072
600	2015-05-24 12:00:00	0.0383835	0.013	0.0072
601	2015-05-24 13:00:00	0.0452835	0.013	0.0072
602	2015-05-24 14:00:00	0.0779695	0.013	0.0072
603	2015-05-24 15:00:00	0.0708978	0.013	0.0072
604	2015-05-24 16:00:00	0.042623	0.013	0.0072
605	2015-05-24 17:00:00	0.0576369	0.013	0.0072
606	2015-05-24 18:00:00	0.0692441	0.013	0.0072
607	2015-05-24 19:00:00	0.0463713	0.013	0.0381038
608	2015-05-24 20:00:00	0.0520898	0.013	0.0072
609	2015-05-24 21:00:00	0.0288978	0.013	0.0072
610	2015-05-24 22:00:00	0.0717898	0.013	0.0072
611	2015-05-24 23:00:00	0.0311007	0.013	0.0072
612	2015-05-25	0.0142828	0.013	0.0148693
613	2015-05-25 01:00:00	0.0454838	0.013	0.0072
614	2015-05-25 02:00:00	0.00847965	0.013	0.0101732
615	2015-05-25 03:00:00	0.0508743	0.013	0.0072
616	2015-05-25 04:00:00	0.0229136	0.013	0.0072
617	2015-05-25 05:00:00	0.0398022	0.013	0.0072
618	2015-05-25 06:00:00	0.0620797	0.013	0.0072
619	2015-05-25 07:00:00	0.0453204	0.013	0.0072
620	2015-05-25 08:00:00	0.0154414	0.013	0.0214314
621	2015-05-25 09:00:00	0.0448213	0.013	0.0072
622	2015-05-25 10:00:00	0.0445162	0.013	0.0756865
623	2015-05-25 11:00:00	0.0650417	0.013	0.0317095
624	2015-05-25 12:00:00	0.0197816	0.013	0.0072
625	2015-05-25 13:00:00	0.0859914	0.013	0.0072
626	2015-05-25 14:00:00	0.0315495	0.013	0.0072
627	2015-05-25 15:00:00	0.0329075	0.013	0.0072
628	2015-05-25 16:00:00	0.210686	0.013	0.00789663
629	2015-05-25 17:00:00	0.0929493	0.013	0.0072
630	2015-05-25 18:00:00	0.0477742	0.013	0.0072
631	2015-05-25 19:00:00	0.0674241	0.013	0.0072
632	2015-05-25 20:00:00	0.0439726	0.013	0.0072
633	2015-05-25 21:00:00	0.194065	0.013	0.0469074
634	2015-05-25 22:00:00	0.0673552	0.013	0.0072
635	2015-05-25 23:00:00	0.0509394	0.0281374	0.010995
636	2015-05-26	0.0714306	0.013	0.0072
637	2015-05-26 01:00:00	0.0732825	0.013	0.0072
638	2015-05-26 02:00:00	0.0336776	0.0191412	0.0072
639	2015-05-26 03:00:00	0.0414191	0.013	0.0072
640	2015-05-26 04:00:00	0.0395676	0.0222138	0.0072
641	2015-05-26 05:00:00	0.0432559	0.013	0.0072
642	2015-05-26 06:00:00	0.0226115	0.0262236	0.0072
643	2015-05-26 07:00:00	0.0476568	0.013	0.0072
644	2015-05-26 08:00:00	0.0191195	0.013	0.0255411
645	2015-05-26 09:00:00	0.077342	0.013	0.0072
646	2015-05-26 10:00:00	0.0690916	0.013	0.0072
647	2015-05-26 11:00:00	0.0541691	0.013	0.0072
648	2015-05-26 12:00:00	0.0123836	0.0480953	0.00802401
649	2015-05-26 13:00:00	0.068302	0.013	0.0072
650	2015-05-26 14:00:00	0.0453295	0.0217147	0.0072
651	2015-05-26 15:00:00	0.0633926	0.013	0.0072
652	2015-05-26 16:00:00	0.0519131	0.013	0.0072
653	2015-05-26 17:00:00	0.0734398	0.013	0.0072
654	2015-05-26 18:00:00	0.0482962	0.013	0.0072
655	2015-05-26 19:00:00	0.12253	0.013	0.0155644
656	2015-05-26 20:00:00	0.0320038	0.013	0.0072
657	2015-05-26 21:00:00	0.0533525	0.013	0.0072
658	2015-05-26 22:00:00	0.073351	0.013	0.0072
659	2015-05-26 23:00:00	0.0516551	0.013	0.0072
660	2015-05-27	0.0362174	0.013	0.0072
661	2015-05-27 01:00:00	0.0360125	0.0235214	0.0203772
662	2015-05-27 02:00:00	0.0941985	0.013	0.0072
663	2015-05-27 03:00:00	0.0653382	0.013	0.0072
664	2015-05-27 04:00:00	0.0459799	0.013	0.0072
665	2015-05-27 05:00:00	0.215169	0.013	0.0072
666	2015-05-27 06:00:00	0.0702924	0.013	0.0072
667	2015-05-27 07:00:00	0.0493873	0.013	0.0072
668	2015-05-27 08:00:00	0.0803077	0.013	0.0072
669	2015-05-27 09:00:00	0.0219846	0.0688877	0.0072
670	2015-05-27 10:00:00	0.0367629	0.0491606	0.0072
671	2015-05-27 11:00:00	0.0661715	0.013	0.0072
672	2015-05-27 12:00:00	0.0123427	0.0615125	0.0162002
673	2015-05-27 13:00:00	0.0560645	0.013	0.0072
674	2015-05-27 14:00:00	0.0588477	0.013	0.0178523
675	2015-05-27 15:00:00	0.0786769	0.013	0.0072
676	2015-05-27 16:00:00	0.0401816	0.013	0.0072
677	2015-05-27 17:00:00	0.0611677	0.013	0.0072
678	2015-05-27 18:00:00	0.0553808	0.013	0.0072
679	2015-05-27 19:00:00	0.180619	0.013	0.0138272
680	2015-05-27 20:00:00	0.022002	0.0471926	0.0072
681	2015-05-27 21:00:00	0.0693573	0.013	0.0072
682	2015-05-27 22:00:00	0.0608328	0.013	0.0072
683	2015-05-27 23:00:00	0.0545434	0.060649	0.0072
684	2015-05-28	0.0832619	0.013	0.0072
685	2015-05-28 01:00:00	0.0188336	0.0613298	0.0072
686	2015-05-28 02:00:00	0.0754131	0.013	0.0072
687	2015-05-28 03:00:00	0.0372727	0.013	0.0072
688	2015-05-28 04:00:00	0.0320073	0.013	0.0134829
689	2015-05-28 05:00:00	0.0442822	0.013	0.0072
690	2015-05-28 06:00:00	0.0498814	0.013	0.0245955
691	2015-05-28 07:00:00	0.053156	0.013	0.0072
692	2015-05-28 08:00:00	0.0526788	0.013	0.0072
693	2015-05-28 09:00:00	0.0874684	0.013	0.0072
694	2015-05-28 10:00:00	0.0532251	0.013	0.0072
695	2015-05-28 11:00:00	0.080568	0.013	0.0072
696	2015-05-28 12:00:00	0.0817762	0.013	0.0072
697	2015-05-28 13:00:00	0.163067	0.013	0.0192293
698	2015-05-28 14:00:00	0.0165662	0.0491357	0.0072
699	2015-05-28 15:00:00	0.208619	0.013	0.0116065
700	2015-05-28 16:00:00	0.0587015	0.013	0.0072
701	2015-05-28 17:00:00	0.114632	0.013	0.0072
702	2015-05-28 18:00:00	0.0465814	0.013	0.0072
703	2015-05-28 19:00:00	0.127366	0.013	0.0072
704	2015-05-28 20:00:00	0.0427114	0.013	0.0072
705	2015-05-28 21:00:00	0.0700722	0.013	0.0072
706	2015-05-28 22:00:00	0.141209	0.013	0.0072
707	2015-05-28 23:00:00	0.0727401	0.013	0.0072
708	2015-05-29	0.0426783	0.013	0.0072
709	2015-05-29 01:00:00	0.0358752	0.0382962	0.0072
710	2015-05-29 02:00:00	0.0582295	0.013	0.0072
711	2015-05-29 03:00:00	0.257201	0.013	0.0072
712	2015-05-29 04:00:00	0.0543179	0.013	0.0072
713	2015-05-29 05:00:00	0.0573715	0.0371604	0.0072
714	2015-05-29 06:00:00	0.111169	0.013	0.0072
715	2015-05-29 07:00:00	0.0703575	0.013	0.0072
716	2015-05-29 08:00:00	0.118967	0.013	0.0072
717	2015-05-29 09:00:00	0.08671	0.013	0.0072
718	2015-05-29 10:00:00	0.0372672	0.0807685	0.0126383
719	2015-05-29 11:00:00	0.196604	0.013	0.0072
720	2015-05-29 12:00:00	0.0958591	0.013	0.0072
721	2015-05-29 13:00:00	0.0631742	0.013	0.0072
722	2015-05-29 14:00:00	0.0370758	0.013	0.0072
723	2015-05-29 15:00:00	0.0780494	0.0445945	0.0072
724	2015-05-29 16:00:00	0.0652452	0.0252302	0.0072
725	2015-05-29 17:00:00	0.081441	0.013	0.0072
726	2015-05-29 18:00:00	0.0579853	0.013	0.0072
727	2015-05-29 19:00:00	0.0355192	0.0388145	0.0072
728	2015-05-29 20:00:00	0.129228	0.013	0.027591
729	2015-05-29 21:00:00	0.0171725	0.0570072	0.0134753
730	2015-05-29 22:00:00	0.0740257	0.013	0.0072
731	2015-05-29 23:00:00	0.113021	0.013	0.0072
732	2015-05-30	0.00697049	0.034739	0.00737517
733	2015-05-30 01:00:00	0.130101	0.013	0.0072
734	2015-05-30 02:00:00	0.0148628	0.0336929	0.0110098
735	2015-05-30 03:00:00	0.0394812	0.016419	0.0072
736	2015-05-30 04:00:00	0.04935	0.013	0.0072
737	2015-05-30 05:00:00	0.150666	0.013	0.0072
738	2015-05-30 06:00:00	0.0338083	0.013	0.0072
739	2015-05-30 07:00:00	0.0419623	0.013	0.0115793
740	2015-05-30 08:00:00	0.0386673	0.013	0.0072
741	2015-05-30 09:00:00	0.17382	0.013	0.0072
742	2015-05-30 10:00:00	0.0657613	0.013	0.0072
743	2015-05-30 11:00:00	0.0255217	0.0688257	0.0072373
744	2015-05-30 12:00:00	0.120536	0.013	0.0120782
745	2015-05-30 13:00:00	0.0916872	0.013	0.0072
746	2015-05-30 14:00:00	0.0903094	0.013	0.0072
747	2015-05-30 15:00:00	0.131122	0.013	0.0072
748	2015-05-30 16:00:00	0.0957579	0.013	0.0072
749	2015-05-30 17:00:00	0.0537096	0.013	0.0072
750	2015-05-30 18:00:00	0.0472902	0.0376711	0.0072
751	2015-05-30 19:00:00	0.0608595	0.013	0.0072
752	2015-05-30 20:00:00	0.0157941	0.0707626	0.0072
753	2015-05-30 21:00:00	0.0343012	0.0517371	0.0072
754	2015-05-30 22:00:00	0.0644215	0.013	0.0072
755	2015-05-30 23:00:00	0.062731	0.0273489	0.0072
756	2015-05-31	0.0277192	0.0154288	0.0072
757	2015-05-31 01:00:00	0.0939809	0.013	0.0072
758	2015-05-31 02:00:00	0.0997584	0.013	0.00820158
759	2015-05-31 03:00:00	0.0404349	0.0692249	0.0072
760	2015-05-31 04:00:00	0.0837898	0.013	0.0072
761	2015-05-31 05:00:00	0.0917962	0.013	0.0072
762	2015-05-31 06:00:00	0.0914708	0.0466185	0.0072
763	2015-05-31 07:00:00	0.0776105	0.013	0.0072
764	2015-05-31 08:00:00	0.0449208	0.0200849	0.00802907
765	2015-05-31 09:00:00	0.105349	0.013	0.0072
766	2015-05-31 10:00:00	0.0496237	0.0564535	0.0072
767	2015-05-31 11:00:00	0.0873446	0.013	0.0072
768	2015-05-31 12:00:00	0.086371	0.013	0.0072
769	2015-05-31 13:00:00	0.0514102	0.0645393	0.0072
770	2015-05-31 14:00:00	0.093537	0.013	0.0072
771	2015-05-31 15:00:00	0.0974799	0.013	0.0072
772	2015-05-31 16:00:00	0.0149643	0.0594632	0.00758869
773	2015-05-31 17:00:00	0.18547	0.013	0.0072
774	2015-05-31 18:00:00	0.0371523	0.0807487	0.0072
775	2015-05-31 19:00:00	0.0727733	0.013	0.0072
776	2015-05-31 20:00:00	0.0635696	0.013	0.0072
777	2015-05-31 21:00:00	0.0659807	0.0558697	0.0090318
778	2015-05-31 22:00:00	0.0909512	0.013	0.0072
779	2015-05-31 23:00:00	0.245543	0.013	0.0171847
780	2015-06-01	0.027959	0.0298112	0.0072
781	2015-06-01 01:00:00	0.0560453	0.013	0.0072
782	2015-06-01 02:00:00	0.0520108	0.0359938	0.0164353
783	2015-06-01 03:00:00	0.0556135	0.0316778	0.0072
784	2015-06-01 04:00:00	0.0547796	0.013	0.0072
785	2015-06-01 05:00:00	0.176639	0.013	0.0072
786	2015-06-01 06:00:00	0.10019	0.013	0.0072
787	2015-06-01 07:00:00	0.0703591	0.013	0.0072
788	2015-06-01 08:00:00	0.0653598	0.013	0.0072
789	2015-06-01 09:00:00	0.256954	0.013	0.0072
790	2015-06-01 10:00:00	0.0264166	0.0747931	0.0072
791	2015-06-01 11:00:00	0.0587531	0.013	0.0072
792	2015-06-01 12:00:00	0.0758604	0.013	0.0072
793	2015-06-01 13:00:00	0.186774	0.013	0.0072
794	2015-06-01 14:00:00	0.170411	0.013	0.0072
795	2015-06-01 15:00:00	0.0763127	0.013	0.0072
796	2015-06-01 16:00:00	0.081565	0.013	0.0072
797	2015-06-01 17:00:00	0.287267	0.013	0.0072
798	2015-06-01 18:00:00	0.054948	0.013	0.0072
799	2015-06-01 19:00:00	0.0638193	0.013	0.0072
800	2015-06-01 20:00:00	0.0723678	0.013	0.0072
801	2015-06-01 21:00:00	0.177143	0.013	0.0072
802	2015-06-01 22:00:00	0.0331203	0.0326125	0.0190717
803	2015-06-01 23:00:00	0.302807	0.013	0.0145376
804	2015-06-02	0.0666171	0.013	0.0072
805	2015-06-02 01:00:00	0.14275	0.013	0.0072
806	2015-06-02 02:00:00	0.0470995	0.013	0.0072
807	2015-06-02 03:00:00	0.15157	0.013	0.0072
808	2015-06-02 04:00:00	0.0683045	0.013	0.0072
809	2015-06-02 05:00:00	0.224073	0.013	0.0072
810	2015-06-02 06:00:00	0.0752788	0.013	0.0072
811	2015-06-02 07:00:00	0.096117	0.013	0.0072
812	2015-06-02 08:00:00	0.0807033	0.013	0.0072
813	2015-06-02 09:00:00	0.10728	0.013	0.0072
814	2015-06-02 10:00:00	0.0819325	0.013	0.0072
815	2015-06-02 11:00:00	0.0924982	0.013	0.0072
816	2015-06-02 12:00:00	0.0468336	0.013	0.0127795
817	2015-06-02 13:00:00	0.0443942	0.0338914	0.0072
818	2015-06-02 14:00:00	0.0601723	0.013	0.0072
819	2015-06-02 15:00:00	0.0506575	0.013	0.0072
820	2015-06-02 16:00:00	0.0265334	0.0294782	0.0290038
821	2015-06-02 17:00:00	0.0275166	0.0268198	0.0072
822	2015-06-02 18:00:00	0.0766657	0.013	0.0072
823	2015-06-02 19:00:00	0.0373388	0.013	0.0072
824	2015-06-02 20:00:00	0.0336091	0.013	0.0072
825	2015-06-02 21:00:00	0.0404702	0.013	0.0072
826	2015-06-02 22:00:00	0.0310424	0.013	0.0072
827	2015-06-02 23:00:00	0.0373419	0.013	0.0072
828	2015-06-03	0.0949474	0.013	0.0072
829	2015-06-03 01:00:00	0.0196748	0.056613	0.0072
830	2015-06-03 02:00:00	0.0787384	0.013	0.0168729
831	2015-06-03 03:00:00	0.0317983	0.0233716	0.0072
832	2015-06-03 04:00:00	0.0747604	0.013	0.0072
833	2015-06-03 05:00:00	0.044768	0.013	0.0072
834	2015-06-03 06:00:00	0.0326019	0.013	0.0072
835	2015-06-03 07:00:00	0.0674919	0.013	0.0072
836	2015-06-03 08:00:00	0.0238138	0.013	0.0072
837	2015-06-03 09:00:00	0.119448	0.013	0.0072
838	2015-06-03 10:00:00	0.117884	0.013	0.0072
839	2015-06-03 11:00:00	0.145701	0.013	0.0072
840	2015-06-03 12:00:00	0.0337254	0.013	0.0072
841	2015-06-03 13:00:00	0.0975435	0.013	0.0072
842	2015-06-03 14:00:00	0.00877422	0.013	0.0072
843	2015-06-03 15:00:00	0.172394	0.013	0.0072
844	2015-06-03 16:00:00	0.0247063	0.013	0.0072
845	2015-06-03 17:00:00	0.0482058	0.013	0.0072
846	2015-06-03 18:00:00	0.00643433	0.013	0.0072
847	2015-06-03 19:00:00	0.0435074	0.013	0.0072
848	2015-06-03 20:00:00	0.0194491	0.013	0.00766648
849	2015-06-03 21:00:00	0.0320774	0.013	0.0072
850	2015-06-03 22:00:00	0.0523207	0.013	0.0072
851	2015-06-03 23:00:00	0.0205696	0.013	0.0072
852	2015-06-04	0.0035	0.013	0.0072
853	2015-06-04 01:00:00	0.0556543	0.0144652	0.0072
854	2015-06-04 02:00:00	0.0249291	0.013	0.0072
855	2015-06-04 03:00:00	0.00741642	0.0369614	0.0072
856	2015-06-04 04:00:00	0.0141443	0.013	0.0072
857	2015-06-04 05:00:00	0.020801	0.013	0.0234799
858	2015-06-04 06:00:00	0.0444276	0.013	0.0072
859	2015-06-04 07:00:00	0.011396	0.013	0.0072
860	2015-06-04 08:00:00	0.0109922	0.013	0.0072
861	2015-06-04 09:00:00	0.0386637	0.013	0.0072
862	2015-06-04 10:00:00	0.082357	0.013	0.0207511
863	2015-06-04 11:00:00	0.0201701	0.013	0.0072
864	2015-06-04 12:00:00	0.0129141	0.013	0.0072
865	2015-06-04 13:00:00	0.0792368	0.013	0.0154365
866	2015-06-04 14:00:00	0.00933748	0.013	0.0072
867	2015-06-04 15:00:00	0.0521138	0.013	0.0072
868	2015-06-04 16:00:00	0.0666813	0.013	0.00820511
869	2015-06-04 17:00:00	0.0241782	0.013	0.0072
870	2015-06-04 18:00:00	0.0197263	0.013	0.0072
871	2015-06-04 19:00:00	0.0536339	0.013	0.0072
872	2015-06-04 20:00:00	0.0384408	0.013	0.0072
873	2015-06-04 21:00:00	0.0447652	0.013	0.0072
874	2015-06-04 22:00:00	0.0314872	0.0259366	0.0072
875	2015-06-04 23:00:00	0.0443321	0.013	0.0072
876	2015-06-05	0.0337602	0.013	0.0072
877	2015-06-05 01:00:00	0.0284905	0.013	0.0072
878	2015-06-05 02:00:00	0.0928006	0.013	0.0072
879	2015-06-05 03:00:00	0.0200569	0.013	0.0236506
880	2015-06-05 04:00:00	0.0133814	0.013	0.0072
881	2015-06-05 05:00:00	0.0876997	0.013	0.0072
882	2015-06-05 06:00:00	0.0520614	0.013	0.00794925
883	2015-06-05 07:00:00	0.0297348	0.013	0.0235301
884	2015-06-05 08:00:00	0.0865401	0.013	0.0072
885	2015-06-05 09:00:00	0.0308926	0.013	0.0072
886	2015-06-05 10:00:00	0.0570128	0.013	0.0072
887	2015-06-05 11:00:00	0.0372348	0.013	0.0072
888	2015-06-05 12:00:00	0.116441	0.013	0.0072
889	2015-06-05 13:00:00	0.0192245	0.0245471	0.0072
890	2015-06-05 14:00:00	0.117564	0.013	0.00780136
891	2015-06-05 15:00:00	0.0390317	0.013	0.0072
892	2015-06-05 16:00:00	0.0199118	0.013	0.0072
893	2015-06-05 17:00:00	0.17073	0.013	0.0072
894	2015-06-05 18:00:00	0.0385592	0.013	0.0072
895	2015-06-05 19:00:00	0.0299174	0.013	0.0072
896	2015-06-05 20:00:00	0.0206463	0.013	0.0072
897	2015-06-05 21:00:00	0.0400973	0.013	0.0072
898	2015-06-05 22:00:00	0.0259924	0.013	0.0072
899	2015-06-05 23:00:00	0.0739029	0.013	0.0237374
900	2015-06-06	0.0255908	0.013	0.0072
901	2015-06-06 01:00:00	0.0607834	0.013	0.00991405
902	2015-06-06 02:00:00	0.0742818	0.013	0.00875059
903	2015-06-06 03:00:00	0.0289605	0.013	0.0072
904	2015-06-06 04:00:00	0.0200877	0.013	0.0072
905	2015-06-06 05:00:00	0.0547735	0.013	0.0072
906	2015-06-06 06:00:00	0.053479	0.013	0.0072
907	2015-06-06 07:00:00	0.027501	0.013	0.0072
908	2015-06-06 08:00:00	0.0469642	0.013	0.0072
909	2015-06-06 09:00:00	0.0495162	0.013	0.0072
910	2015-06-06 10:00:00	0.0730422	0.013	0.0072
911	2015-06-06 11:00:00	0.0601245	0.013	0.0100734
912	2015-06-06 12:00:00	0.0335094	0.013	0.00842387
913	2015-06-06 13:00:00	0.0331625	0.013	0.0072
914	2015-06-06 14:00:00	0.0375656	0.013	0.0072
915	2015-06-06 15:00:00	0.0261886	0.013	0.0072
916	2015-06-06 16:00:00	0.108346	0.013	0.0072
917	2015-06-06 17:00:00	0.0312034	0.013	0.0072
918	2015-06-06 18:00:00	0.0435747	0.013	0.0072
919	2015-06-06 19:00:00	0.0613274	0.013	0.0072
920	2015-06-06 20:00:00	0.0394012	0.013	0.0072
921	2015-06-06 21:00:00	0.0215353	0.013	0.0281441
922	2015-06-06 22:00:00	0.0450611	0.013	0.0072
923	2015-06-06 23:00:00	0.0788147	0.013	0.0072
924	2015-06-07	0.00991392	0.013	0.0072
925	2015-06-07 01:00:00	0.0502125	0.013	0.0072
926	2015-06-07 02:00:00	0.0393694	0.013	0.0072
927	2015-06-07 03:00:00	0.0629096	0.013	0.0072
928	2015-06-07 04:00:00	0.0298147	0.013	0.0072
929	2015-06-07 05:00:00	0.042452	0.013	0.0072
930	2015-06-07 06:00:00	0.148887	0.013	0.0110417
931	2015-06-07 07:00:00	0.0342551	0.013	0.0072
932	2015-06-07 08:00:00	0.0423575	0.013	0.0072
933	2015-06-07 09:00:00	0.0262188	0.013	0.0072
934	2015-06-07 10:00:00	0.0482602	0.0294454	0.0072
935	2015-06-07 11:00:00	0.0405756	0.0191065	0.0072
936	2015-06-07 12:00:00	0.0122616	0.0473141	0.0202473
937	2015-06-07 13:00:00	0.0530414	0.013	0.0072
938	2015-06-07 14:00:00	0.0635346	0.013	0.0072
939	2015-06-07 15:00:00	0.0374265	0.013	0.0072
940	2015-06-07 16:00:00	0.0220168	0.013	0.0072
941	2015-06-07 17:00:00	0.0440409	0.013	0.0072
942	2015-06-07 18:00:00	0.0295768	0.013	0.0072
943	2015-06-07 19:00:00	0.038516	0.013	0.0072
944	2015-06-07 20:00:00	0.0498939	0.013	0.0072
945	2015-06-07 21:00:00	0.0403305	0.013	0.0107982
946	2015-06-07 22:00:00	0.0540186	0.013	0.0072
947	2015-06-07 23:00:00	0.0518717	0.013	0.0072
948	2015-06-08	0.0428975	0.013	0.0072
949	2015-06-08 01:00:00	0.0918601	0.013	0.0073635
950	2015-06-08 02:00:00	0.112432	0.013	0.0216526
951	2015-06-08 03:00:00	0.0814118	0.013	0.0189122
952	2015-06-08 04:00:00	0.0795672	0.013	0.00925649
953	2015-06-08 05:00:00	0.0471265	0.013	0.0072
954	2015-06-08 06:00:00	0.0273664	0.0174305	0.0072
955	2015-06-08 07:00:00	0.0035	0.0149347	0.0072
956	2015-06-08 08:00:00	0.143481	0.013	0.0072
957	2015-06-08 09:00:00	0.0563831	0.013	0.0072
958	2015-06-08 10:00:00	0.137774	0.013	0.0072
959	2015-06-08 11:00:00	0.0148721	0.013	0.0072
960	2015-06-08 12:00:00	0.0589101	0.013	0.0072
961	2015-06-08 13:00:00	0.0469495	0.013	0.0072
962	2015-06-08 14:00:00	0.055553	0.013	0.0072
963	2015-06-08 15:00:00	0.0461307	0.013	0.0072
964	2015-06-08 16:00:00	0.0407367	0.013	0.0072
965	2015-06-08 17:00:00	0.059538	0.013	0.0072
966	2015-06-08 18:00:00	0.0266734	0.013	0.0072
967	2015-06-08 19:00:00	0.0107724	0.0462871	0.0072
968	2015-06-08 20:00:00	0.0250083	0.0444343	0.0072
969	2015-06-08 21:00:00	0.0718993	0.013	0.0072
970	2015-06-08 22:00:00	0.286507	0.013	0.0075058
971	2015-06-08 23:00:00	0.0189305	0.0287826	0.0072
972	2015-06-09	0.135528	0.013	0.0072
973	2015-06-09 01:00:00	0.0294523	0.0312407	0.0072
974	2015-06-09 02:00:00	0.164921	0.013	0.0072
975	2015-06-09 03:00:00	0.0783041	0.013	0.0072
976	2015-06-09 04:00:00	0.155153	0.013	0.00812798
977	2015-06-09 05:00:00	0.0539046	0.013	0.0072
978	2015-06-09 06:00:00	0.11367	0.013	0.0072
979	2015-06-09 07:00:00	0.0124996	0.0374377	0.0072
980	2015-06-09 08:00:00	0.0102241	0.0458071	0.0072
981	2015-06-09 09:00:00	0.153749	0.013	0.0200988
982	2015-06-09 10:00:00	0.0361357	0.013	0.0072
983	2015-06-09 11:00:00	0.0558106	0.0209466	0.0072
984	2015-06-09 12:00:00	0.200697	0.013	0.0072
985	2015-06-09 13:00:00	0.0748166	0.0344796	0.0072
986	2015-06-09 14:00:00	0.163128	0.013	0.0072
987	2015-06-09 15:00:00	0.0596267	0.013	0.0072
988	2015-06-09 16:00:00	0.0431185	0.0269168	0.0072
989	2015-06-09 17:00:00	0.0551366	0.013	0.0072
990	2015-06-09 18:00:00	0.258893	0.013	0.0072
991	2015-06-09 19:00:00	0.0736679	0.013	0.0072
992	2015-06-09 20:00:00	0.212168	0.013	0.0072
993	2015-06-09 21:00:00	0.0264307	0.0842762	0.00840958
994	2015-06-09 22:00:00	0.0990318	0.013	0.0072
995	2015-06-09 23:00:00	0.0410153	0.067439	0.0243816
996	2015-06-10	0.0962369	0.013	0.00722512
997	2015-06-10 01:00:00	0.189045	0.013	0.0072
998	2015-06-10 02:00:00	0.18784	0.013	0.0072
999	2015-06-10 03:00:00	0.0812766	0.013	0.0072
1000	2015-06-10 04:00:00	0.0631038	0.0310232	0.0072
1001	2015-06-10 05:00:00	0.0790344	0.013	0.0072
1002	2015-06-10 06:00:00	0.0384488	0.0481879	0.0072
1003	2015-06-10 07:00:00	0.0423997	0.0575142	0.0072
1004	2015-06-10 08:00:00	0.0901116	0.013	0.0072
1005	2015-06-10 09:00:00	0.0989441	0.013	0.0072
1006	2015-06-10 10:00:00	0.162718	0.013	0.0072
1007	2015-06-10 11:00:00	0.0706986	0.013	0.0072
1008	2015-06-10 12:00:00	0.0454939	0.0481973	0.0072
1009	2015-06-10 13:00:00	0.0690703	0.013	0.0072
1010	2015-06-10 14:00:00	0.307561	0.013	0.0072
1011	2015-06-10 15:00:00	0.0545041	0.013	0.0072
1012	2015-06-10 16:00:00	0.0368818	0.013	0.0072
1013	2015-06-10 17:00:00	0.0468631	0.013	0.0072
1014	2015-06-10 18:00:00	0.107796	0.013	0.0072
1015	2015-06-10 19:00:00	0.0649365	0.013	0.0072
1016	2015-06-10 20:00:00	0.067814	0.013	0.0072
1017	2015-06-10 21:00:00	0.0739832	0.013	0.0072
1018	2015-06-10 22:00:00	0.0614756	0.013	0.0072
1019	2015-06-10 23:00:00	0.0570615	0.013	0.0072
1020	2015-06-11	0.128045	0.013	0.0101072
1021	2015-06-11 01:00:00	0.0605385	0.013	0.0156209
1022	2015-06-11 02:00:00	0.0603905	0.013	0.0072
1023	2015-06-11 03:00:00	0.0272276	0.013	0.0144221
1024	2015-06-11 04:00:00	0.0579901	0.013	0.0072
1025	2015-06-11 05:00:00	0.229658	0.013	0.0072
1026	2015-06-11 06:00:00	0.0836404	0.013	0.0072
1027	2015-06-11 07:00:00	0.141523	0.013	0.0072
1028	2015-06-11 08:00:00	0.0437394	0.0356558	0.0072
1029	2015-06-11 09:00:00	0.19668	0.013	0.0072
1030	2015-06-11 10:00:00	0.035943	0.0303668	0.0072
1031	2015-06-11 11:00:00	0.0593175	0.0224704	0.0072
1032	2015-06-11 12:00:00	0.0532536	0.013	0.0072
1033	2015-06-11 13:00:00	0.111291	0.013	0.0072
1034	2015-06-11 14:00:00	0.087329	0.013	0.0072
1035	2015-06-11 15:00:00	0.114343	0.013	0.0072
1036	2015-06-11 16:00:00	0.0469594	0.013	0.0072
1037	2015-06-11 17:00:00	0.0299437	0.013	0.0072
1038	2015-06-11 18:00:00	0.145894	0.013	0.0072
1039	2015-06-11 19:00:00	0.0439419	0.013	0.0072
1040	2015-06-11 20:00:00	0.0501562	0.013	0.0072
1041	2015-06-11 21:00:00	0.0462034	0.013	0.0072
1042	2015-06-11 22:00:00	0.0267488	0.013	0.0072
1043	2015-06-11 23:00:00	0.033768	0.013	0.0072
1044	2015-06-12	0.0342916	0.013	0.0072
1045	2015-06-12 01:00:00	0.0369639	0.013	0.0072
1046	2015-06-12 02:00:00	0.0303495	0.013	0.0072
1047	2015-06-12 03:00:00	0.025496	0.013	0.00804281
1048	2015-06-12 04:00:00	0.0766016	0.013	0.0249923
1049	2015-06-12 05:00:00	0.0494439	0.013	0.0072
1050	2015-06-12 06:00:00	0.0536768	0.013	0.0072
1051	2015-06-12 07:00:00	0.0325786	0.013	0.0072
1052	2015-06-12 08:00:00	0.107568	0.013	0.0072
1053	2015-06-12 09:00:00	0.0132896	0.013	0.0072
1054	2015-06-12 10:00:00	0.00942161	0.0195036	0.0103035
1055	2015-06-12 11:00:00	0.0112205	0.013	0.0072
1056	2015-06-12 12:00:00	0.0327151	0.013	0.0072
1057	2015-06-12 13:00:00	0.0732169	0.013	0.0288607
1058	2015-06-12 14:00:00	0.0403105	0.013	0.0072
1059	2015-06-12 15:00:00	0.0129167	0.013	0.0072
1060	2015-06-12 16:00:00	0.0291569	0.013	0.0072
1061	2015-06-12 17:00:00	0.0203871	0.013	0.0072
1062	2015-06-12 18:00:00	0.026651	0.013	0.0072
1063	2015-06-12 19:00:00	0.0436578	0.013	0.0072
1064	2015-06-12 20:00:00	0.0368936	0.013	0.0072
1065	2015-06-12 21:00:00	0.0115772	0.013	0.0072
1066	2015-06-12 22:00:00	0.121333	0.013	0.0163204
1067	2015-06-12 23:00:00	0.00987917	0.013	0.0135818
1068	2015-06-13	0.023224	0.013	0.0072
1069	2015-06-13 01:00:00	0.0313825	0.013	0.0072
1070	2015-06-13 02:00:00	0.00952422	0.013	0.0072
1071	2015-06-13 03:00:00	0.0607807	0.013	0.0072
1072	2015-06-13 04:00:00	0.0299667	0.013	0.0072
1073	2015-06-13 05:00:00	0.125415	0.013	0.0277401
1074	2015-06-13 06:00:00	0.0161758	0.013	0.0072
1075	2015-06-13 07:00:00	0.0214806	0.013	0.0072
1076	2015-06-13 08:00:00	0.0426001	0.013	0.0072
1077	2015-06-13 09:00:00	0.00906888	0.0237841	0.0072
1078	2015-06-13 10:00:00	0.0536981	0.013	0.0072
1079	2015-06-13 11:00:00	0.0210253	0.013	0.0072
1080	2015-06-13 12:00:00	0.0494687	0.013	0.0072
1081	2015-06-13 13:00:00	0.0360287	0.013	0.0072
1082	2015-06-13 14:00:00	0.0805702	0.013	0.0410595
1083	2015-06-13 15:00:00	0.0301621	0.013	0.0072
1084	2015-06-13 16:00:00	0.0633767	0.013	0.0115826
1085	2015-06-13 17:00:00	0.0399505	0.013	0.0072
1086	2015-06-13 18:00:00	0.0772272	0.013	0.0072
1087	2015-06-13 19:00:00	0.0396893	0.013	0.0072
1088	2015-06-13 20:00:00	0.0746142	0.013	0.0072
1089	2015-06-13 21:00:00	0.104542	0.013	0.00965554
1090	2015-06-13 22:00:00	0.0139408	0.0175325	0.0072
1091	2015-06-13 23:00:00	0.00825051	0.0344729	0.0101597
1092	2015-06-14	0.0243448	0.013	0.0072
1093	2015-06-14 01:00:00	0.0922602	0.013	0.0072
1094	2015-06-14 02:00:00	0.0167267	0.013	0.0072
1095	2015-06-14 03:00:00	0.0416662	0.013	0.0072
1096	2015-06-14 04:00:00	0.0550517	0.013	0.0072
1097	2015-06-14 05:00:00	0.0474439	0.013	0.0072
1098	2015-06-14 06:00:00	0.0355465	0.013	0.0072
1099	2015-06-14 07:00:00	0.0483571	0.013	0.0072
1100	2015-06-14 08:00:00	0.0460611	0.013	0.0072
1101	2015-06-14 09:00:00	0.0403631	0.013	0.0072
1102	2015-06-14 10:00:00	0.041769	0.013	0.0072
1103	2015-06-14 11:00:00	0.0661278	0.013	0.0072
1104	2015-06-14 12:00:00	0.0583798	0.013	0.0072
1105	2015-06-14 13:00:00	0.132409	0.013	0.0072
1106	2015-06-14 14:00:00	0.0466754	0.013	0.0072
1107	2015-06-14 15:00:00	0.060476	0.013	0.0072
1108	2015-06-14 16:00:00	0.0311938	0.013	0.0072
1109	2015-06-14 17:00:00	0.0337218	0.013	0.0072
1110	2015-06-14 18:00:00	0.177475	0.013	0.0203
1111	2015-06-14 19:00:00	0.144452	0.013	0.0325086
1112	2015-06-14 20:00:00	#N/A	#N/A	#N/A
1113	2015-06-14 21:00:00	0.0428923	0.013	0.0072
1114	2015-06-14 22:00:00	0.0479961	0.013	0.0072
1115	2015-06-14 23:00:00	0.0619995	0.013	0.0072
1116	2015-06-15	#N/A	#N/A	#N/A
1117	2015-06-15 01:00:00	0.0555011	0.013	0.0072
1118	2015-06-15 02:00:00	0.0431658	0.013	0.0072
1119	2015-06-15 03:00:00	0.0521174	0.013	0.0072
1120	2015-06-15 04:00:00	#N/A	#N/A	#N/A
1121	2015-06-15 05:00:00	0.063258	0.013	0.0072
1122	2015-06-15 06:00:00	0.0596201	0.013	0.0072
1123	2015-06-15 07:00:00	0.0554691	0.013	0.0072
1124	2015-06-15 08:00:00	#N/A	#N/A	#N/A
1125	2015-06-15 09:00:00	0.0600185	0.013	0.0072
1126	2015-06-15 10:00:00	0.0470399	0.013	0.00720302
1127	2015-06-15 11:00:00	0.0777889	0.013	0.0072
1128	2015-06-15 12:00:00	#N/A	#N/A	#N/A
1129	2015-06-15 13:00:00	0.0418991	0.052107	0.0184917
1130	2015-06-15 14:00:00	0.240415	0.013	0.0101072
1131	2015-06-15 15:00:00	0.0469503	0.013	0.0072
1132	2015-06-15 16:00:00	#N/A	#N/A	#N/A
1133	2015-06-15 17:00:00	0.0840142	0.013	0.0072
1134	2015-06-15 18:00:00	0.0532736	0.0468845	0.0072
1135	2015-06-15 19:00:00	0.10662	0.013	0.0072
1136	2015-06-15 20:00:00	#N/A	#N/A	#N/A
1137	2015-06-15 21:00:00	0.0878349	0.013	0.0072
1138	2015-06-15 22:00:00	0.140123	0.013	0.0072
1139	2015-06-15 23:00:00	0.0482703	0.068969	0.0128722
1140	2015-06-16	#N/A	#N/A	#N/A
1141	2015-06-16 01:00:00	0.220198	0.013	0.0072
1142	2015-06-16 02:00:00	0.0732973	0.0557487	0.0072
1143	2015-06-16 03:00:00	0.0925107	0.013	0.0072
1144	2015-06-16 04:00:00	#N/A	#N/A	#N/A
1145	2015-06-16 05:00:00	0.277361	0.013	0.0072
1146	2015-06-16 06:00:00	0.105398	0.013	0.0072
1147	2015-06-16 07:00:00	0.053517	0.132656	0.0072
1148	2015-06-16 08:00:00	#N/A	#N/A	#N/A
1149	2015-06-16 09:00:00	0.125317	0.013	0.0072
1150	2015-06-16 10:00:00	0.0569832	0.0825706	0.0072
1151	2015-06-16 11:00:00	0.117113	0.013	0.0072
1152	2015-06-16 12:00:00	#N/A	#N/A	#N/A
1153	2015-06-16 13:00:00	0.0955897	0.014687	0.00724104
1154	2015-06-16 14:00:00	0.0851901	0.013	0.0072
1155	2015-06-16 15:00:00	0.0132744	0.0654556	0.0072
1156	2015-06-16 16:00:00	#N/A	#N/A	#N/A
1157	2015-06-16 17:00:00	0.0760822	0.013	0.0072
1158	2015-06-16 18:00:00	0.0738047	0.013	0.0120717
1159	2015-06-16 19:00:00	0.0866778	0.013	0.0072
1160	2015-06-16 20:00:00	#N/A	#N/A	#N/A
1161	2015-06-16 21:00:00	0.0586348	0.013	0.0072
1162	2015-06-16 22:00:00	0.0365897	0.013	0.0072
1163	2015-06-16 23:00:00	0.147462	0.013	0.0113924
1164	2015-06-17	#N/A	#N/A	#N/A
1165	2015-06-17 01:00:00	0.164027	0.013	0.00954267
1166	2015-06-17 02:00:00	0.0660234	0.013	0.0113393
1167	2015-06-17 03:00:00	0.0670396	0.013	0.0072
1168	2015-06-17 04:00:00	#N/A	#N/A	#N/A
1169	2015-06-17 05:00:00	0.0771391	0.013	0.0072
1170	2015-06-17 06:00:00	0.0344173	0.013	0.0072
1171	2015-06-17 07:00:00	0.0450135	0.013	0.0072
1172	2015-06-17 08:00:00	#N/A	#N/A	#N/A
1173	2015-06-17 09:00:00	0.102841	0.013	0.0072
1174	2015-06-17 10:00:00	0.0548114	0.013	0.0072
1175	2015-06-17 11:00:00	0.046979	0.013	0.0072
1176	2015-06-17 12:00:00	#N/A	#N/A	#N/A
1177	2015-06-17 13:00:00	0.0366109	0.013	0.0072
1178	2015-06-17 14:00:00	0.0313681	0.013	0.0072
1179	2015-06-17 15:00:00	0.0486147	0.013	0.0072
1180	2015-06-17 16:00:00	#N/A	#N/A	#N/A
1181	2015-06-17 17:00:00	0.0226149	0.013	0.0072
1182	2015-06-17 18:00:00	0.00788931	0.0355096	0.0072
1183	2015-06-17 19:00:00	0.046635	0.013	0.0072
1184	2015-06-17 20:00:00	#N/A	#N/A	#N/A
1185	2015-06-17 21:00:00	0.0536306	0.013	0.0072
1186	2015-06-17 22:00:00	0.0933999	0.013	0.0363652
1187	2015-06-17 23:00:00	0.0456497	0.0237731	0.0072
1188	2015-06-18	#N/A	#N/A	#N/A
1189	2015-06-18 01:00:00	0.10229	0.013	0.0072
1190	2015-06-18 02:00:00	0.0491892	0.013	0.0072
1191	2015-06-18 03:00:00	0.0845846	0.013	0.0072
1192	2015-06-18 04:00:00	#N/A	#N/A	#N/A
1193	2015-06-18 05:00:00	0.199414	0.013	0.0374212
1194	2015-06-18 06:00:00	0.0603308	0.013	0.0072
1195	2015-06-18 07:00:00	0.0170042	0.0847445	0.0236648
1196	2015-06-18 08:00:00	#N/A	#N/A	#N/A
1197	2015-06-18 09:00:00	0.0578598	0.0261365	0.0072
1198	2015-06-18 10:00:00	0.0454626	0.013	0.0208835
1199	2015-06-18 11:00:00	0.0443829	0.013	0.0072
1200	2015-06-18 12:00:00	#N/A	#N/A	#N/A
1201	2015-06-18 13:00:00	0.0269058	0.013	0.0072
1202	2015-06-18 14:00:00	0.047762	0.013	0.0072
1203	2015-06-18 15:00:00	0.0409864	0.013	0.0072
1204	2015-06-18 16:00:00	#N/A	#N/A	#N/A
1205	2015-06-18 17:00:00	0.0326456	0.013	0.0072
1206	2015-06-18 18:00:00	0.0936263	0.013	0.0072
1207	2015-06-18 19:00:00	0.0658135	0.013	0.0608794
1208	2015-06-18 20:00:00	#N/A	#N/A	#N/A
1209	2015-06-18 21:00:00	0.0881218	0.013	0.0300489
1210	2015-06-18 22:00:00	0.0396494	0.013	0.0072
1211	2015-06-18 23:00:00	0.0131693	0.013	0.0072
1212	2015-06-19	#N/A	#N/A	#N/A
1213	2015-06-19 01:00:00	0.0125676	0.013	0.0072
1214	2015-06-19 02:00:00	0.0534274	0.013	0.0072
1215	2015-06-19 03:00:00	0.0374853	0.013	0.0072
1216	2015-06-19 04:00:00	#N/A	#N/A	#N/A
1217	2015-06-19 05:00:00	0.0634318	0.013	0.0072
1218	2015-06-19 06:00:00	0.0518417	0.013	0.0072
1219	2015-06-19 07:00:00	0.0215403	0.0212861	0.0165133
1220	2015-06-19 08:00:00	#N/A	#N/A	#N/A
1221	2015-06-19 09:00:00	0.0510196	0.013	0.0072
1222	2015-06-19 10:00:00	0.069037	0.013	0.0133699
1223	2015-06-19 11:00:00	0.0402495	0.013	0.0072
1224	2015-06-19 12:00:00	#N/A	#N/A	#N/A
1225	2015-06-19 13:00:00	0.0538731	0.013	0.020936
1226	2015-06-19 14:00:00	0.038554	0.013	0.0072
1227	2015-06-19 15:00:00	0.0155621	0.013	0.0072
1228	2015-06-19 16:00:00	#N/A	#N/A	#N/A
1229	2015-06-19 17:00:00	0.0768978	0.013	0.0142021
1230	2015-06-19 18:00:00	0.0287735	0.013	0.00888197
1231	2015-06-19 19:00:00	0.017153	0.013	0.0072
1232	2015-06-19 20:00:00	#N/A	#N/A	#N/A
1233	2015-06-19 21:00:00	0.0133597	0.0366488	0.0072
1234	2015-06-19 22:00:00	0.0574539	0.013	0.0072
1235	2015-06-19 23:00:00	0.158884	0.013	0.0126495
1236	2015-06-20	#N/A	#N/A	#N/A
1237	2015-06-20 01:00:00	0.0657238	0.013	0.0072
1238	2015-06-20 02:00:00	0.0448768	0.0189527	0.0072
1239	2015-06-20 03:00:00	0.130894	0.013	0.0072
1240	2015-06-20 04:00:00	#N/A	#N/A	#N/A
1241	2015-06-20 05:00:00	0.0509725	0.013	0.0072
1242	2015-06-20 06:00:00	0.0466315	0.013	0.0072
1243	2015-06-20 07:00:00	0.0242533	0.0410452	0.0072
1244	2015-06-20 08:00:00	#N/A	#N/A	#N/A
1245	2015-06-20 09:00:00	0.0425353	0.013	0.0072
1246	2015-06-20 10:00:00	0.0875113	0.013	0.0072
1247	2015-06-20 11:00:00	0.0542791	0.013	0.0072
1248	2015-06-20 12:00:00	#N/A	#N/A	#N/A
1249	2015-06-20 13:00:00	0.0598008	0.013	0.0072
1250	2015-06-20 14:00:00	0.0834624	0.013	0.0072
1251	2015-06-20 15:00:00	0.0401282	0.0557334	0.0072
1252	2015-06-20 16:00:00	#N/A	#N/A	#N/A
1253	2015-06-20 17:00:00	0.0196194	0.0614085	0.0154761
1254	2015-06-20 18:00:00	0.0494825	0.0523755	0.0072
1255	2015-06-20 19:00:00	0.084376	0.013	0.0072
1256	2015-06-20 20:00:00	#N/A	#N/A	#N/A
1257	2015-06-20 21:00:00	0.111986	0.013	0.0072
1258	2015-06-20 22:00:00	0.0448213	0.013	0.0072
1259	2015-06-20 23:00:00	0.0741535	0.013	0.0072
1260	2015-06-21	#N/A	#N/A	#N/A
1261	2015-06-21 01:00:00	0.0910738	0.013	0.0072
1262	2015-06-21 02:00:00	0.0727757	0.013	0.0072
1263	2015-06-21 03:00:00	0.0292771	0.0255704	0.0137702
1264	2015-06-21 04:00:00	#N/A	#N/A	#N/A
1265	2015-06-21 05:00:00	0.0595288	0.013	0.0072
1266	2015-06-21 06:00:00	0.10571	0.013	0.0072
1267	2015-06-21 07:00:00	0.172773	0.013	0.0072
1268	2015-06-21 08:00:00	#N/A	#N/A	#N/A
1269	2015-06-21 09:00:00	0.105886	0.013	0.0072
1270	2015-06-21 10:00:00	0.104442	0.013	0.0072
1271	2015-06-21 11:00:00	0.0615598	0.013	0.0072
1272	2015-06-21 12:00:00	#N/A	#N/A	#N/A
1273	2015-06-21 13:00:00	0.0762799	0.013	0.0072
1274	2015-06-21 14:00:00	0.0884759	0.013	0.0072
1275	2015-06-21 15:00:00	0.0545762	0.013	0.0072
1276	2015-06-21 16:00:00	#N/A	#N/A	#N/A
1277	2015-06-21 17:00:00	0.0712625	0.013	0.0072
1278	2015-06-21 18:00:00	0.0867519	0.013	0.0072
1279	2015-06-21 19:00:00	0.0284165	0.013	0.0072
1280	2015-06-21 20:00:00	#N/A	#N/A	#N/A
1281	2015-06-21 21:00:00	0.0882708	0.013	0.0072
1282	2015-06-21 22:00:00	0.183094	0.013	0.0443605
1283	2015-06-21 23:00:00	0.174824	0.013	0.0208059
1284	2015-06-22	#N/A	#N/A	#N/A
1285	2015-06-22 01:00:00	0.113669	0.0222104	0.0072
1286	2015-06-22 02:00:00	0.12644	0.013	0.0072
1287	2015-06-22 03:00:00	0.126409	0.013	0.0072
1288	2015-06-22 04:00:00	#N/A	#N/A	#N/A
1289	2015-06-22 05:00:00	0.0902409	0.013	0.0072
1290	2015-06-22 06:00:00	0.0961318	0.013	0.00761198
1291	2015-06-22 07:00:00	0.0689861	0.013	0.00782684
1292	2015-06-22 08:00:00	#N/A	#N/A	#N/A
1293	2015-06-22 09:00:00	0.0248888	0.013	0.0358904
1294	2015-06-22 10:00:00	0.04817	0.013	0.0072
1295	2015-06-22 11:00:00	0.103022	0.013	0.0072
1296	2015-06-22 12:00:00	#N/A	#N/A	#N/A
1297	2015-06-22 13:00:00	0.0461172	0.013	0.0072
1298	2015-06-22 14:00:00	0.0791898	0.013	0.0072
1299	2015-06-22 15:00:00	0.0175038	0.0531226	0.0072
1300	2015-06-22 16:00:00	#N/A	#N/A	#N/A
1301	2015-06-22 17:00:00	0.0808155	0.013	0.0072
1302	2015-06-22 18:00:00	0.106429	0.013	0.0072
1303	2015-06-22 19:00:00	0.0627006	0.013	0.0072
1304	2015-06-22 20:00:00	#N/A	#N/A	#N/A
1305	2015-06-22 21:00:00	0.0503952	0.013	0.0072
1306	2015-06-22 22:00:00	0.049765	0.013	0.0147834
1307	2015-06-22 23:00:00	0.0435436	0.0166805	0.0072
1308	2015-06-23	#N/A	#N/A	#N/A
1309	2015-06-23 01:00:00	0.0268447	0.013	0.0090386
1310	2015-06-23 02:00:00	0.0577719	0.013	0.0072
1311	2015-06-23 03:00:00	0.0361953	0.013	0.0072
1312	2015-06-23 04:00:00	#N/A	#N/A	#N/A
1313	2015-06-23 05:00:00	0.0538496	0.013	0.00807512
1314	2015-06-23 06:00:00	0.0524616	0.0600098	0.0072
1315	2015-06-23 07:00:00	0.084867	0.013	0.0072
1316	2015-06-23 08:00:00	#N/A	#N/A	#N/A
1317	2015-06-23 09:00:00	0.0846613	0.013	0.0072
1318	2015-06-23 10:00:00	0.0624522	0.013	0.0072
1319	2015-06-23 11:00:00	0.0482822	0.013	0.0153362
1320	2015-06-23 12:00:00	#N/A	#N/A	#N/A
1321	2015-06-23 13:00:00	0.0473011	0.013	0.0072
1322	2015-06-23 14:00:00	0.0257845	0.013	0.0072
1323	2015-06-23 15:00:00	0.0168046	0.0162861	0.0072
1324	2015-06-23 16:00:00	#N/A	#N/A	#N/A
1325	2015-06-23 17:00:00	0.0612502	0.013	0.0245034
1326	2015-06-23 18:00:00	0.0301102	0.013	0.0072
1327	2015-06-23 19:00:00	0.0930775	0.013	0.0072
1328	2015-06-23 20:00:00	#N/A	#N/A	#N/A
1329	2015-06-23 21:00:00	0.0254418	0.013	0.0072
1330	2015-06-23 22:00:00	0.105402	0.013	0.0122948
1331	2015-06-23 23:00:00	0.0595389	0.013	0.0072
1332	2015-06-24	#N/A	#N/A	#N/A
1333	2015-06-24 01:00:00	0.0327945	0.013	0.00827928
1334	2015-06-24 02:00:00	0.144391	0.013	0.0072
1335	2015-06-24 03:00:00	0.051407	0.013	0.0072
1336	2015-06-24 04:00:00	#N/A	#N/A	#N/A
1337	2015-06-24 05:00:00	0.0327546	0.013	0.0072
1338	2015-06-24 06:00:00	0.0470668	0.013	0.0072
1339	2015-06-24 07:00:00	0.0572117	0.013	0.00904197
1340	2015-06-24 08:00:00	#N/A	#N/A	#N/A
1341	2015-06-24 09:00:00	0.00654171	0.013	0.00761187
1342	2015-06-24 10:00:00	0.0387933	0.013	0.0072
1343	2015-06-24 11:00:00	0.0774917	0.013	0.0072
1344	2015-06-24 12:00:00	#N/A	#N/A	#N/A
1345	2015-06-24 13:00:00	0.0269631	0.013	0.0072
1346	2015-06-24 14:00:00	0.0443333	0.013	0.0072
1347	2015-06-24 15:00:00	0.0517189	0.013	0.0072
1348	2015-06-24 16:00:00	#N/A	#N/A	#N/A
1349	2015-06-24 17:00:00	0.0579287	0.013	0.0072
1350	2015-06-24 18:00:00	0.0568495	0.013	0.0072
1351	2015-06-24 19:00:00	0.033548	0.013	0.0072
1352	2015-06-24 20:00:00	#N/A	#N/A	#N/A
1353	2015-06-24 21:00:00	0.170343	0.013	0.0126029
1354	2015-06-24 22:00:00	0.0304108	0.0677391	0.0178319
1355	2015-06-24 23:00:00	0.100582	0.013	0.0072
1356	2015-06-25	#N/A	#N/A	#N/A
1357	2015-06-25 01:00:00	0.0882233	0.013	0.0072
1358	2015-06-25 02:00:00	0.166671	0.013	0.0072
1359	2015-06-25 03:00:00	0.0401145	0.0195719	0.0101906
1360	2015-06-25 04:00:00	#N/A	#N/A	#N/A
1361	2015-06-25 05:00:00	0.0836588	0.013	0.0072
1362	2015-06-25 06:00:00	0.260903	0.013	0.0072
1363	2015-06-25 07:00:00	0.139386	0.013	0.0072
1364	2015-06-25 08:00:00	#N/A	#N/A	#N/A
1365	2015-06-25 09:00:00	0.0497225	0.013	0.0072
1366	2015-06-25 10:00:00	0.0278547	0.0710802	0.00724837
1367	2015-06-25 11:00:00	0.0604373	0.013	0.0072
1368	2015-06-25 12:00:00	#N/A	#N/A	#N/A
1369	2015-06-25 13:00:00	0.124493	0.013	0.0158576
1370	2015-06-25 14:00:00	0.069805	0.013	0.0072
1371	2015-06-25 15:00:00	0.063719	0.013	0.0072
1372	2015-06-25 16:00:00	#N/A	#N/A	#N/A
1373	2015-06-25 17:00:00	0.0570829	0.013	0.0072
1374	2015-06-25 18:00:00	0.101656	0.013	0.0072
1375	2015-06-25 19:00:00	0.0712512	0.013	0.0072
1376	2015-06-25 20:00:00	#N/A	#N/A	#N/A
1377	2015-06-25 21:00:00	0.201396	0.013	0.00805104
1378	2015-06-25 22:00:00	0.10024	0.0186665	0.0072
1379	2015-06-25 23:00:00	0.0917529	0.013	0.0072
1380	2015-06-26	#N/A	#N/A	#N/A
1381	2015-06-26 01:00:00	0.0328811	0.0596198	0.0072
1382	2015-06-26 02:00:00	0.0370132	0.100994	0.0072
1383	2015-06-26 03:00:00	0.0585259	0.0271018	0.0196074
1384	2015-06-26 04:00:00	#N/A	#N/A	#N/A
1385	2015-06-26 05:00:00	0.144294	0.013	0.0072
1386	2015-06-26 06:00:00	0.106521	0.013	0.0072
1387	2015-06-26 07:00:00	0.117355	0.013	0.0072
1388	2015-06-26 08:00:00	#N/A	#N/A	#N/A
1389	2015-06-26 09:00:00	0.0348346	0.0683341	0.0072
1390	2015-06-26 10:00:00	0.0342654	0.0658686	0.0072
1391	2015-06-26 11:00:00	0.0385105	0.138443	0.0072
1392	2015-06-26 12:00:00	#N/A	#N/A	#N/A
1393	2015-06-26 13:00:00	0.130089	0.013	0.0072
1394	2015-06-26 14:00:00	0.0884351	0.013	0.0072
1395	2015-06-26 15:00:00	0.0310878	0.0820977	0.0072
1396	2015-06-26 16:00:00	#N/A	#N/A	#N/A
1397	2015-06-26 17:00:00	0.25213	0.013	0.0072
1398	2015-06-26 18:00:00	0.094862	0.0693549	0.0072
1399	2015-06-26 19:00:00	0.224521	0.013	0.0072
1400	2015-06-26 20:00:00	#N/A	#N/A	#N/A
1401	2015-06-26 21:00:00	0.0267124	0.0850095	0.00814513
1402	2015-06-26 22:00:00	0.0324553	0.11637	0.00879097
1403	2015-06-26 23:00:00	0.231316	0.013	0.00818761
1404	2015-06-27	#N/A	#N/A	#N/A
1405	2015-06-27 01:00:00	0.030575	0.0609584	0.0072
1406	2015-06-27 02:00:00	0.234205	0.013	0.0072
1407	2015-06-27 03:00:00	0.0848517	0.0410959	0.011187
1408	2015-06-27 04:00:00	#N/A	#N/A	#N/A
1409	2015-06-27 05:00:00	0.101391	0.013	0.0072
1410	2015-06-27 06:00:00	0.301108	0.013	0.0161895
1411	2015-06-27 07:00:00	0.249235	0.013	0.0072
1412	2015-06-27 08:00:00	#N/A	#N/A	#N/A
1413	2015-06-27 09:00:00	0.0409073	0.100044	0.0072
1414	2015-06-27 10:00:00	0.0590502	0.111831	0.011797
1415	2015-06-27 11:00:00	0.317727	0.013	0.0072
1416	2015-06-27 12:00:00	#N/A	#N/A	#N/A
1417	2015-06-27 13:00:00	0.160429	0.013	0.0072
1418	2015-06-27 14:00:00	0.141718	0.013	0.0072
1419	2015-06-27 15:00:00	0.114702	0.0544148	0.0072
1420	2015-06-27 16:00:00	#N/A	#N/A	#N/A
1421	2015-06-27 17:00:00	0.0908122	0.013	0.0072
1422	2015-06-27 18:00:00	0.116125	0.013	0.0072
1423	2015-06-27 19:00:00	0.264683	0.013	0.0072
1424	2015-06-27 20:00:00	#N/A	#N/A	#N/A
1425	2015-06-27 21:00:00	0.232489	0.013	0.0159277
1426	2015-06-27 22:00:00	0.192075	0.013	0.0110626
1427	2015-06-27 23:00:00	0.359149	0.013	0.00938804
1428	2015-06-28	#N/A	#N/A	#N/A
1429	2015-06-28 01:00:00	0.0567599	0.013	0.0072
1430	2015-06-28 02:00:00	0.0489228	0.0309334	0.0072
1431	2015-06-28 03:00:00	0.164812	0.013	0.0072
1432	2015-06-28 04:00:00	#N/A	#N/A	#N/A
1433	2015-06-28 05:00:00	0.0474749	0.013	0.0072
1434	2015-06-28 06:00:00	0.0673769	0.013	0.0072
1435	2015-06-28 07:00:00	0.0353647	0.0359164	0.0072
1436	2015-06-28 08:00:00	#N/A	#N/A	#N/A
1437	2015-06-28 09:00:00	0.0109322	0.0492109	0.00884888
1438	2015-06-28 10:00:00	0.024325	0.0276257	0.0104185
1439	2015-06-28 11:00:00	0.198716	0.013	0.0072
1440	2015-06-28 12:00:00	#N/A	#N/A	#N/A
1441	2015-06-28 13:00:00	0.0404944	0.013	0.0072
1442	2015-06-28 14:00:00	0.0593659	0.013	0.0072
1443	2015-06-28 15:00:00	0.129985	0.013	0.0072
1444	2015-06-28 16:00:00	#N/A	#N/A	#N/A
1445	2015-06-28 17:00:00	0.0714316	0.013	0.0072
1446	2015-06-28 18:00:00	0.0405211	0.013	0.0072
1447	2015-06-28 19:00:00	0.0373094	0.0194084	0.0072
1448	2015-06-28 20:00:00	#N/A	#N/A	#N/A
1449	2015-06-28 21:00:00	0.0960079	0.013	0.0100522
1450	2015-06-28 22:00:00	0.0581542	0.013	0.0072
1451	2015-06-28 23:00:00	0.0472428	0.013	0.0072
1452	2015-06-29	#N/A	#N/A	#N/A
1453	2015-06-29 01:00:00	0.0211718	0.0222521	0.0072
1454	2015-06-29 02:00:00	0.0603416	0.013	0.0072
1455	2015-06-29 03:00:00	0.0561294	0.0699747	0.0072
1456	2015-06-29 04:00:00	#N/A	#N/A	#N/A
1457	2015-06-29 05:00:00	0.0296383	0.013	0.0072
1458	2015-06-29 06:00:00	0.0481744	0.013	0.0189996
1459	2015-06-29 07:00:00	0.203494	0.013	0.0072
1460	2015-06-29 08:00:00	#N/A	#N/A	#N/A
1461	2015-06-29 09:00:00	0.0638212	0.013	0.0072
1462	2015-06-29 10:00:00	0.0331908	0.013	0.0072
1463	2015-06-29 11:00:00	0.123215	0.013	0.00815161
1464	2015-06-29 12:00:00	#N/A	#N/A	#N/A
1465	2015-06-29 13:00:00	0.0450891	0.013	0.0072
1466	2015-06-29 14:00:00	0.0185279	0.0634798	0.0072
1467	2015-06-29 15:00:00	0.0571368	0.013	0.0072
1468	2015-06-29 16:00:00	#N/A	#N/A	#N/A
1469	2015-06-29 17:00:00	0.0403847	0.013	0.0072
1470	2015-06-29 18:00:00	0.137448	0.013	0.0072
1471	2015-06-29 19:00:00	0.0308524	0.013	0.0127301
1472	2015-06-29 20:00:00	#N/A	#N/A	#N/A
1473	2015-06-29 21:00:00	0.0336189	0.013	0.0072
1474	2015-06-29 22:00:00	0.0299862	0.0148406	0.00744686
1475	2015-06-29 23:00:00	0.0512465	0.013	0.0072
1476	2015-06-30	#N/A	#N/A	#N/A
1477	2015-06-30 01:00:00	0.0540098	0.013	0.0215196
1478	2015-06-30 02:00:00	0.05599	0.013	0.0072
1479	2015-06-30 03:00:00	0.213854	0.013	0.0072
1480	2015-06-30 04:00:00	#N/A	#N/A	#N/A
1481	2015-06-30 05:00:00	0.30673	0.013	0.0072
1482	2015-06-30 06:00:00	0.310629	0.013	0.00824833
1483	2015-06-30 07:00:00	0.160361	0.013	0.0072
1484	2015-06-30 08:00:00	#N/A	#N/A	#N/A
1485	2015-06-30 09:00:00	0.0939273	0.013	0.0072
1486	2015-06-30 10:00:00	0.0971544	0.0404798	0.0072
1487	2015-06-30 11:00:00	0.257904	0.013	0.0072
1488	2015-06-30 12:00:00	#N/A	#N/A	#N/A
1489	2015-06-30 13:00:00	0.0717716	0.013	0.0072
1490	2015-06-30 14:00:00	0.0659687	0.013	0.0072
1491	2015-06-30 15:00:00	0.0515051	0.0532802	0.0072
1492	2015-06-30 16:00:00	#N/A	#N/A	#N/A
1493	2015-06-30 17:00:00	0.080036	0.0221445	0.0072
1494	2015-06-30 18:00:00	0.0729249	0.0185543	0.0072
1495	2015-06-30 19:00:00	0.295538	0.013	0.0072
1496	2015-06-30 20:00:00	#N/A	#N/A	#N/A
1497	2015-06-30 21:00:00	0.180755	0.013	0.00826109
1498	2015-06-30 22:00:00	0.0306786	0.0692708	0.0072
1499	2015-06-30 23:00:00	0.112109	0.013	0.0072
1500	2015-07-01	#N/A	#N/A	#N/A
1501	2015-07-01 01:00:00	0.0444388	0.0238702	0.0072
1502	2015-07-01 02:00:00	0.0476871	0.014577	0.0072
1503	2015-07-01 03:00:00	0.0801094	0.013	0.0072
1504	2015-07-01 04:00:00	#N/A	#N/A	#N/A
1505	2015-07-01 05:00:00	0.0525639	0.013	0.0072
1506	2015-07-01 06:00:00	0.0343179	0.013	0.0072
1507	2015-07-01 07:00:00	0.179432	0.013	0.0113237
1508	2015-07-01 08:00:00	#N/A	#N/A	#N/A
1509	2015-07-01 09:00:00	0.0191995	0.013	0.0072
1510	2015-07-01 10:00:00	0.0983508	0.013	0.00821295
1511	2015-07-01 11:00:00	0.178356	0.013	0.0072
1512	2015-07-01 12:00:00	#N/A	#N/A	#N/A
1513	2015-07-01 13:00:00	0.0404992	0.013	0.0072
1514	2015-07-01 14:00:00	0.0588619	0.013	0.00721079
1515	2015-07-01 15:00:00	0.0146993	0.0532936	0.0072
1516	2015-07-01 16:00:00	#N/A	#N/A	#N/A
1517	2015-07-01 17:00:00	0.060608	0.013	0.0072
1518	2015-07-01 18:00:00	0.0619415	0.013	0.0072
1519	2015-07-01 19:00:00	0.13064	0.013	0.0072
1520	2015-07-01 20:00:00	#N/A	#N/A	#N/A
1521	2015-07-01 21:00:00	0.0333589	0.013	0.0153993
1522	2015-07-01 22:00:00	0.0315223	0.0253873	0.0072
1523	2015-07-01 23:00:00	0.0388785	0.013	0.0072
1524	2015-07-02	#N/A	#N/A	#N/A
1525	2015-07-02 01:00:00	0.0335285	0.013	0.00904962
1526	2015-07-02 02:00:00	0.0640152	0.013	0.0072
1527	2015-07-02 03:00:00	0.0469838	0.013	0.0072
1528	2015-07-02 04:00:00	#N/A	#N/A	#N/A
1529	2015-07-02 05:00:00	0.100062	0.013	0.0072
1530	2015-07-02 06:00:00	0.0460565	0.0176183	0.0121157
1531	2015-07-02 07:00:00	0.0423538	0.013	0.0072
1532	2015-07-02 08:00:00	#N/A	#N/A	#N/A
1533	2015-07-02 09:00:00	0.0380162	0.013	0.0072
1534	2015-07-02 10:00:00	0.0525555	0.013	0.0072
1535	2015-07-02 11:00:00	0.0469573	0.013	0.016525
1536	2015-07-02 12:00:00	#N/A	#N/A	#N/A
1537	2015-07-02 13:00:00	0.0980209	0.013	0.0072
1538	2015-07-02 14:00:00	0.0601668	0.013	0.0072
1539	2015-07-02 15:00:00	0.0742661	0.013	0.0072
1540	2015-07-02 16:00:00	#N/A	#N/A	#N/A
1541	2015-07-02 17:00:00	0.0558981	0.013	0.0072
1542	2015-07-02 18:00:00	0.0485892	0.013	0.0072
1543	2015-07-02 19:00:00	0.0435353	0.013	0.0072
1544	2015-07-02 20:00:00	#N/A	#N/A	#N/A
1545	2015-07-02 21:00:00	0.0330665	0.013	0.0072
1546	2015-07-02 22:00:00	0.0470258	0.013	0.0144929
1547	2015-07-02 23:00:00	0.01334	0.013	0.0511277
1548	2015-07-03	#N/A	#N/A	#N/A
1549	2015-07-03 01:00:00	0.0823899	0.013	0.0324766
1550	2015-07-03 02:00:00	0.0596738	0.013	0.0072
1551	2015-07-03 03:00:00	0.0266467	0.013	0.0072
1552	2015-07-03 04:00:00	#N/A	#N/A	#N/A
1553	2015-07-03 05:00:00	0.0359889	0.013	0.0072
1554	2015-07-03 06:00:00	0.0470574	0.013	0.0072
1555	2015-07-03 07:00:00	0.0324178	0.013	0.0072
1556	2015-07-03 08:00:00	#N/A	#N/A	#N/A
1557	2015-07-03 09:00:00	0.124706	0.013	0.00898565
1558	2015-07-03 10:00:00	0.0539372	0.013	0.0339942
1559	2015-07-03 11:00:00	0.0459666	0.013	0.0299633
1560	2015-07-03 12:00:00	#N/A	#N/A	#N/A
1561	2015-07-03 13:00:00	0.0431645	0.013	0.0072
1562	2015-07-03 14:00:00	0.0593854	0.013	0.0072
1563	2015-07-03 15:00:00	0.0114618	0.0365147	0.0072
1564	2015-07-03 16:00:00	#N/A	#N/A	#N/A
1565	2015-07-03 17:00:00	0.0411884	0.0565123	0.0072
1566	2015-07-03 18:00:00	0.126644	0.013	0.0390393
1567	2015-07-03 19:00:00	0.079821	0.013	0.0072
1568	2015-07-03 20:00:00	#N/A	#N/A	#N/A
1569	2015-07-03 21:00:00	0.134226	0.013	0.0072
1570	2015-07-03 22:00:00	0.0406811	0.049009	0.0072
1571	2015-07-03 23:00:00	0.0690516	0.013	0.0072
1572	2015-07-04	#N/A	#N/A	#N/A
1573	2015-07-04 01:00:00	0.154235	0.013	0.0104023
1574	2015-07-04 02:00:00	0.0598042	0.013	0.0072
1575	2015-07-04 03:00:00	0.0451486	0.013	0.0072
1576	2015-07-04 04:00:00	#N/A	#N/A	#N/A
1577	2015-07-04 05:00:00	0.202471	0.013	0.00736484
1578	2015-07-04 06:00:00	0.0370838	0.013	0.0072
1579	2015-07-04 07:00:00	0.0609935	0.013	0.0072
1580	2015-07-04 08:00:00	#N/A	#N/A	#N/A
1581	2015-07-04 09:00:00	0.0809382	0.013	0.0072
1582	2015-07-04 10:00:00	0.0749879	0.013	0.0206028
1583	2015-07-04 11:00:00	0.0568805	0.013	0.0072
1584	2015-07-04 12:00:00	#N/A	#N/A	#N/A
1585	2015-07-04 13:00:00	0.0334865	0.013	0.0072
1586	2015-07-04 14:00:00	0.0273753	0.013	0.0072
1587	2015-07-04 15:00:00	0.0142341	0.0164808	0.0238242
1588	2015-07-04 16:00:00	#N/A	#N/A	#N/A
1589	2015-07-04 17:00:00	0.0323137	0.013	0.0072
1590	2015-07-04 18:00:00	0.0338398	0.013	0.0072
1591	2015-07-04 19:00:00	0.0396466	0.013	0.0072
1592	2015-07-04 20:00:00	#N/A	#N/A	#N/A
1593	2015-07-04 21:00:00	0.0537546	0.013	0.0189886
1594	2015-07-04 22:00:00	0.114301	0.013	0.0450553
1595	2015-07-04 23:00:00	0.0480139	0.013	0.0072
1596	2015-07-05	#N/A	#N/A	#N/A
1597	2015-07-05 01:00:00	0.0453616	0.013	0.0072
1598	2015-07-05 02:00:00	0.0597757	0.013	0.0072
1599	2015-07-05 03:00:00	0.0322534	0.013	0.0354188
1600	2015-07-05 04:00:00	#N/A	#N/A	#N/A
1601	2015-07-05 05:00:00	0.132823	0.013	0.048969
1602	2015-07-05 06:00:00	0.0327758	0.0329725	0.0149881
1603	2015-07-05 07:00:00	0.0504816	0.013	0.0072
1604	2015-07-05 08:00:00	#N/A	#N/A	#N/A
1605	2015-07-05 09:00:00	0.108731	0.013	0.0072
1606	2015-07-05 10:00:00	0.0727563	0.013	0.0072
1607	2015-07-05 11:00:00	0.0909215	0.013	0.0072
1608	2015-07-05 12:00:00	#N/A	#N/A	#N/A
1609	2015-07-05 13:00:00	0.0455311	0.0218198	0.0072
1610	2015-07-05 14:00:00	0.0769358	0.013	0.0072
1611	2015-07-05 15:00:00	0.122192	0.013	0.0072
1612	2015-07-05 16:00:00	#N/A	#N/A	#N/A
1613	2015-07-05 17:00:00	0.100481	0.013	0.0072
1614	2015-07-05 18:00:00	0.0775329	0.013	0.0072
1615	2015-07-05 19:00:00	0.0670947	0.013	0.0072
1616	2015-07-05 20:00:00	#N/A	#N/A	#N/A
1617	2015-07-05 21:00:00	0.0855708	0.013	0.0072
1618	2015-07-05 22:00:00	0.0569742	0.013	0.0190821
1619	2015-07-05 23:00:00	0.0872859	0.013	0.0072
1620	2015-07-06	#N/A	#N/A	#N/A
1621	2015-07-06 01:00:00	0.0891836	0.013	0.0072
1622	2015-07-06 02:00:00	0.0506137	0.013	0.0072
1623	2015-07-06 03:00:00	0.0198077	0.013	0.0226866
1624	2015-07-06 04:00:00	#N/A	#N/A	#N/A
1625	2015-07-06 05:00:00	0.0576228	0.013	0.0072
1626	2015-07-06 06:00:00	0.0837134	0.013	0.0072
1627	2015-07-06 07:00:00	0.0457589	0.013	0.0072
1628	2015-07-06 08:00:00	#N/A	#N/A	#N/A
1629	2015-07-06 09:00:00	0.0642776	0.013	0.0072
1630	2015-07-06 10:00:00	0.0936368	0.013	0.0072
1631	2015-07-06 11:00:00	0.0554814	0.013	0.0072
1632	2015-07-06 12:00:00	#N/A	#N/A	#N/A
1633	2015-07-06 13:00:00	0.0823252	0.013	0.0072
1634	2015-07-06 14:00:00	0.0792328	0.013	0.0072
1635	2015-07-06 15:00:00	0.101228	0.013	0.0072
1636	2015-07-06 16:00:00	#N/A	#N/A	#N/A
1637	2015-07-06 17:00:00	0.102797	0.013	0.0072
1638	2015-07-06 18:00:00	0.105693	0.013	0.0072
1639	2015-07-06 19:00:00	0.110459	0.013	0.0072
1640	2015-07-06 20:00:00	#N/A	#N/A	#N/A
1641	2015-07-06 21:00:00	0.107532	0.013	0.0102191
1642	2015-07-06 22:00:00	0.0995827	0.0427438	0.0072
1643	2015-07-06 23:00:00	0.148079	0.013	0.0162693
1644	2015-07-07	#N/A	#N/A	#N/A
1645	2015-07-07 01:00:00	0.0832775	0.031543	0.0528674
1646	2015-07-07 02:00:00	0.134574	0.013	0.0072
1647	2015-07-07 03:00:00	0.110795	0.013	0.0072
1648	2015-07-07 04:00:00	#N/A	#N/A	#N/A
1649	2015-07-07 05:00:00	0.0729888	0.013	0.0072
1650	2015-07-07 06:00:00	0.205161	0.013	0.0331774
1651	2015-07-07 07:00:00	0.0446738	0.0651526	0.0236034
1652	2015-07-07 08:00:00	#N/A	#N/A	#N/A
1653	2015-07-07 09:00:00	0.0557849	0.013	0.0072
1654	2015-07-07 10:00:00	0.0520306	0.013	0.0072
1655	2015-07-07 11:00:00	0.0690099	0.013	0.0072
1656	2015-07-07 12:00:00	#N/A	#N/A	#N/A
1657	2015-07-07 13:00:00	0.0311583	0.013	0.0072
1658	2015-07-07 14:00:00	0.0521715	0.013	0.0072
1659	2015-07-07 15:00:00	0.0277454	0.013	0.0072
1660	2015-07-07 16:00:00	#N/A	#N/A	#N/A
1661	2015-07-07 17:00:00	0.00701569	0.0182793	0.0072
1662	2015-07-07 18:00:00	0.0361267	0.013	0.0179723
1663	2015-07-07 19:00:00	0.0329016	0.013	0.0153289
1664	2015-07-07 20:00:00	#N/A	#N/A	#N/A
1665	2015-07-07 21:00:00	0.025107	0.013	0.0072
1666	2015-07-07 22:00:00	0.0311229	0.013	0.0072
1667	2015-07-07 23:00:00	0.066651	0.013	0.00977013
1668	2015-07-08	#N/A	#N/A	#N/A
1669	2015-07-08 01:00:00	0.0303439	0.013	0.0072
1670	2015-07-08 02:00:00	0.0122083	0.013	0.0072
1671	2015-07-08 03:00:00	0.0150393	0.013	0.0072
1672	2015-07-08 04:00:00	#N/A	#N/A	#N/A
1673	2015-07-08 05:00:00	0.166431	0.013	0.0483321
1674	2015-07-08 06:00:00	0.021722	0.013	0.0165055
1675	2015-07-08 07:00:00	0.0171262	0.013	0.0072
1676	2015-07-08 08:00:00	#N/A	#N/A	#N/A
1677	2015-07-08 09:00:00	0.0345496	0.013	0.0072
1678	2015-07-08 10:00:00	0.049011	0.013	0.0072
1679	2015-07-08 11:00:00	0.0557515	0.013	0.0072
1680	2015-07-08 12:00:00	#N/A	#N/A	#N/A
1681	2015-07-08 13:00:00	0.0487739	0.013	0.0072
1682	2015-07-08 14:00:00	0.0695782	0.013	0.0072
1683	2015-07-08 15:00:00	0.0689397	0.013	0.0650067
1684	2015-07-08 16:00:00	#N/A	#N/A	#N/A
1685	2015-07-08 17:00:00	0.131483	0.013	0.0402817
1686	2015-07-08 18:00:00	0.0122814	0.0612071	0.0103272
1687	2015-07-08 19:00:00	0.0586368	0.0246873	0.0072
1688	2015-07-08 20:00:00	#N/A	#N/A	#N/A
1689	2015-07-08 21:00:00	0.0747145	0.013	0.0072
1690	2015-07-08 22:00:00	0.0611481	0.013	0.0072
1691	2015-07-08 23:00:00	0.0345874	0.013	0.0072
1692	2015-07-09	#N/A	#N/A	#N/A
1693	2015-07-09 01:00:00	0.0728834	0.0424153	0.0072
1694	2015-07-09 02:00:00	0.0542877	0.0708835	0.0072
1695	2015-07-09 03:00:00	0.0168208	0.0388596	0.0148893
1696	2015-07-09 04:00:00	#N/A	#N/A	#N/A
1697	2015-07-09 05:00:00	0.0670552	0.0296284	0.0072
1698	2015-07-09 06:00:00	0.323892	0.013	0.0335798
1699	2015-07-09 07:00:00	0.0482675	0.013	0.0072
1700	2015-07-09 08:00:00	#N/A	#N/A	#N/A
1701	2015-07-09 09:00:00	0.0388629	0.0779769	0.0072
1702	2015-07-09 10:00:00	0.0547299	0.013	0.020327
1703	2015-07-09 11:00:00	0.0575132	0.013	0.0072
1704	2015-07-09 12:00:00	#N/A	#N/A	#N/A
1705	2015-07-09 13:00:00	0.0716936	0.013	0.0072
1706	2015-07-09 14:00:00	0.0663234	0.013	0.0072
1707	2015-07-09 15:00:00	0.073041	0.013	0.0072
1708	2015-07-09 16:00:00	#N/A	#N/A	#N/A
1709	2015-07-09 17:00:00	0.0866457	0.013	0.0072
1710	2015-07-09 18:00:00	0.0486617	0.0524893	0.0072
1711	2015-07-09 19:00:00	0.105508	0.013	0.0072
1712	2015-07-09 20:00:00	#N/A	#N/A	#N/A
1713	2015-07-09 21:00:00	0.0521904	0.158711	0.0072
1714	2015-07-09 22:00:00	0.179469	0.013	0.0072
1715	2015-07-09 23:00:00	0.201648	0.013	0.0072
1716	2015-07-10	#N/A	#N/A	#N/A
1717	2015-07-10 01:00:00	0.509938	0.013	0.0072
1718	2015-07-10 02:00:00	0.194485	0.155323	0.0072
1719	2015-07-10 03:00:00	0.15094	0.114241	0.0341929
1720	2015-07-10 04:00:00	#N/A	#N/A	#N/A
1721	2015-07-10 05:00:00	0.228773	0.0804596	0.0236543
1722	2015-07-10 06:00:00	0.409745	0.013	0.0072
1723	2015-07-10 07:00:00	0.469248	0.013	0.0072
1724	2015-07-10 08:00:00	#N/A	#N/A	#N/A
1725	2015-07-10 09:00:00	0.498889	0.013	0.0072
1726	2015-07-10 10:00:00	0.18029	0.0649742	0.0226672
1727	2015-07-10 11:00:00	0.132657	0.0889507	0.0072
1728	2015-07-10 12:00:00	#N/A	#N/A	#N/A
1729	2015-07-10 13:00:00	0.134587	0.0843205	0.0159685
1730	2015-07-10 14:00:00	0.277718	0.013	0.0072
1731	2015-07-10 15:00:00	0.191573	0.0577498	0.0072
1732	2015-07-10 16:00:00	#N/A	#N/A	#N/A
1733	2015-07-10 17:00:00	0.246517	0.013	0.0072
1734	2015-07-10 18:00:00	0.0488289	0.239737	0.0072
1735	2015-07-10 19:00:00	0.469638	0.013	0.0072
1736	2015-07-10 20:00:00	#N/A	#N/A	#N/A
1737	2015-07-10 21:00:00	0.234492	0.130883	0.0072
1738	2015-07-10 22:00:00	0.311198	0.022582	0.0072
1739	2015-07-10 23:00:00	0.30789	0.144379	0.0186535
1740	2015-07-11	#N/A	#N/A	#N/A
1741	2015-07-11 01:00:00	0.502814	0.104319	0.0072
1742	2015-07-11 02:00:00	0.362214	0.384977	0.0072
1743	2015-07-11 03:00:00	0.585353	0.013	0.0072
1744	2015-07-11 04:00:00	#N/A	#N/A	#N/A
1745	2015-07-11 05:00:00	0.71482	0.013	0.0072
1746	2015-07-11 06:00:00	0.102505	0.279408	0.0072
1747	2015-07-11 07:00:00	0.324187	0.0981306	0.0072
1748	2015-07-11 08:00:00	#N/A	#N/A	#N/A
1749	2015-07-11 09:00:00	0.229523	0.0728521	0.0216383
1750	2015-07-11 10:00:00	0.476427	0.013	0.0072
1751	2015-07-11 11:00:00	0.511109	0.013	0.0072
1752	2015-07-11 12:00:00	#N/A	#N/A	#N/A
1753	2015-07-11 13:00:00	0.421945	0.013	0.0072
1754	2015-07-11 14:00:00	0.510352	0.013	0.0124219
1755	2015-07-11 15:00:00	0.058852	0.205347	0.0072
1756	2015-07-11 16:00:00	#N/A	#N/A	#N/A
1757	2015-07-11 17:00:00	0.122948	0.0966156	0.0164339
1758	2015-07-11 18:00:00	0.100882	0.160474	0.0072
1759	2015-07-11 19:00:00	0.210837	0.013	0.0072
1760	2015-07-11 20:00:00	#N/A	#N/A	#N/A
1761	2015-07-11 21:00:00	0.658286	0.013	0.0072
1762	2015-07-11 22:00:00	0.682452	0.013	0.0072
1763	2015-07-11 23:00:00	0.126249	0.281421	0.0153088
1764	2015-07-12	#N/A	#N/A	#N/A
1765	2015-07-12 01:00:00	0.20547	0.20386	0.0086417
1766	2015-07-12 02:00:00	0.186524	0.259298	0.0072
1767	2015-07-12 03:00:00	0.556119	0.013	0.0072
1768	2015-07-12 04:00:00	#N/A	#N/A	#N/A
1769	2015-07-12 05:00:00	0.453617	0.013	0.0072
1770	2015-07-12 06:00:00	0.663717	0.013	0.0072
1771	2015-07-12 07:00:00	0.279277	0.160564	0.0072
1772	2015-07-12 08:00:00	#N/A	#N/A	#N/A
1773	2015-07-12 09:00:00	0.241734	0.260629	0.0072
1774	2015-07-12 10:00:00	0.267786	0.26842	0.0072
1775	2015-07-12 11:00:00	0.264698	0.171741	0.0072
1776	2015-07-12 12:00:00	#N/A	#N/A	#N/A
1777	2015-07-12 13:00:00	0.558966	0.013	0.0072
1778	2015-07-12 14:00:00	0.148489	0.260887	0.0072
1779	2015-07-12 15:00:00	0.168591	0.242167	0.0072
1780	2015-07-12 16:00:00	#N/A	#N/A	#N/A
1781	2015-07-12 17:00:00	0.21399	0.269476	0.0072
1782	2015-07-12 18:00:00	0.223154	0.222565	0.0072
1783	2015-07-12 19:00:00	0.162773	0.254354	0.0072
1784	2015-07-12 20:00:00	#N/A	#N/A	#N/A
1785	2015-07-12 21:00:00	0.259569	0.077094	0.0072
1786	2015-07-12 22:00:00	0.539757	0.013	0.0072
1787	2015-07-12 23:00:00	0.236749	0.264445	0.0072
1788	2015-07-13	#N/A	#N/A	#N/A
1789	2015-07-13 01:00:00	0.361447	0.0911563	0.0072
1790	2015-07-13 02:00:00	0.349898	0.0628191	0.0440957
1791	2015-07-13 03:00:00	0.541447	0.013	0.0072
1792	2015-07-13 04:00:00	#N/A	#N/A	#N/A
1793	2015-07-13 05:00:00	0.225715	0.315648	0.0072
1794	2015-07-13 06:00:00	0.459988	0.15331	0.0072
1795	2015-07-13 07:00:00	0.247981	0.380184	0.0212
1796	2015-07-13 08:00:00	#N/A	#N/A	#N/A
1797	2015-07-13 09:00:00	0.52286	0.013	0.0072
1798	2015-07-13 10:00:00	0.672851	0.013	0.0072
1799	2015-07-13 11:00:00	0.394442	0.013	0.0072
1800	2015-07-13 12:00:00	#N/A	#N/A	#N/A
1801	2015-07-13 13:00:00	0.231983	0.0850218	0.0183321
1802	2015-07-13 14:00:00	0.213945	0.0991927	0.0072
1803	2015-07-13 15:00:00	0.147245	0.136522	0.0072
1804	2015-07-13 16:00:00	#N/A	#N/A	#N/A
1805	2015-07-13 17:00:00	0.0619579	0.170729	0.0072
1806	2015-07-13 18:00:00	0.499584	0.013	0.0072
1807	2015-07-13 19:00:00	0.403885	0.013	0.0072
1808	2015-07-13 20:00:00	#N/A	#N/A	#N/A
1809	2015-07-13 21:00:00	0.268559	0.013	0.0072
1810	2015-07-13 22:00:00	0.164085	0.0960617	0.0275809
1811	2015-07-13 23:00:00	0.204454	0.092977	0.0303257
1812	2015-07-14	#N/A	#N/A	#N/A
1813	2015-07-14 01:00:00	0.170999	0.286251	0.0072
1814	2015-07-14 02:00:00	0.524666	0.013	0.0072
1815	2015-07-14 03:00:00	0.655802	0.013	0.0072
1816	2015-07-14 04:00:00	#N/A	#N/A	#N/A
1817	2015-07-14 05:00:00	0.433942	0.013	0.0072
1818	2015-07-14 06:00:00	0.213443	0.246488	0.0106025
1819	2015-07-14 07:00:00	0.223454	0.234764	0.0143003
1820	2015-07-14 08:00:00	#N/A	#N/A	#N/A
1821	2015-07-14 09:00:00	0.0991562	0.246175	0.0072
1822	2015-07-14 10:00:00	0.377247	0.013	0.0072
1823	2015-07-14 11:00:00	0.403455	0.013	0.0072
1824	2015-07-14 12:00:00	#N/A	#N/A	#N/A
1825	2015-07-14 13:00:00	0.311429	0.013	0.0072
1826	2015-07-14 14:00:00	0.0477287	0.146429	0.0072
1827	2015-07-14 15:00:00	0.174961	0.013	0.0072
1828	2015-07-14 16:00:00	#N/A	#N/A	#N/A
1829	2015-07-14 17:00:00	0.0780047	0.138204	0.035195
1830	2015-07-14 18:00:00	0.062646	0.118457	0.0072
1831	2015-07-14 19:00:00	0.120216	0.167728	0.0196005
1832	2015-07-14 20:00:00	#N/A	#N/A	#N/A
1833	2015-07-14 21:00:00	0.15027	0.062362	0.0072
1834	2015-07-14 22:00:00	0.309387	0.013	0.0072
1835	2015-07-14 23:00:00	0.204338	0.0582211	0.0072
1836	2015-07-15	#N/A	#N/A	#N/A
1837	2015-07-15 01:00:00	0.255618	0.105266	0.0072
1838	2015-07-15 02:00:00	0.130729	0.198467	0.0183738
1839	2015-07-15 03:00:00	0.550695	0.013	0.0072
1840	2015-07-15 04:00:00	#N/A	#N/A	#N/A
1841	2015-07-15 05:00:00	0.550531	0.013	0.0072
1842	2015-07-15 06:00:00	0.609324	0.013	0.0072
1843	2015-07-15 07:00:00	0.330759	0.013	0.0072
1844	2015-07-15 08:00:00	#N/A	#N/A	#N/A
1845	2015-07-15 09:00:00	0.387259	0.013	0.0072
1846	2015-07-15 10:00:00	0.274338	0.013	0.0072
1847	2015-07-15 11:00:00	0.116848	0.104974	0.0072
1848	2015-07-15 12:00:00	#N/A	#N/A	#N/A
1849	2015-07-15 13:00:00	0.118748	0.013	0.0421277
1850	2015-07-15 14:00:00	0.115124	0.029316	0.0232726
1851	2015-07-15 15:00:00	0.141902	0.013	0.0072
1852	2015-07-15 16:00:00	#N/A	#N/A	#N/A
1853	2015-07-15 17:00:00	0.0736735	0.013	0.0072
1854	2015-07-15 18:00:00	0.054892	0.0829163	0.0072
1855	2015-07-15 19:00:00	0.102976	0.013	0.0072
1856	2015-07-15 20:00:00	#N/A	#N/A	#N/A
1857	2015-07-15 21:00:00	0.0963028	0.013	0.0145814
1858	2015-07-15 22:00:00	0.204309	0.013	0.0072
1859	2015-07-15 23:00:00	0.0674655	0.013	0.0072
1860	2015-07-16	#N/A	#N/A	#N/A
1861	2015-07-16 01:00:00	0.0439851	0.013	0.0072
1862	2015-07-16 02:00:00	0.0399792	0.0152089	0.0122064
1863	2015-07-16 03:00:00	0.0751772	0.013	0.0072
1864	2015-07-16 04:00:00	#N/A	#N/A	#N/A
1865	2015-07-16 05:00:00	0.0035	0.0316218	0.0072
1866	2015-07-16 06:00:00	0.0418388	0.013	0.0072
1867	2015-07-16 07:00:00	0.122414	0.013	0.0482533
1868	2015-07-16 08:00:00	#N/A	#N/A	#N/A
1869	2015-07-16 09:00:00	0.00582931	0.013	0.0072
1870	2015-07-16 10:00:00	0.0826557	0.013	0.00976634
1871	2015-07-16 11:00:00	0.0318803	0.013	0.0072
1872	2015-07-16 12:00:00	#N/A	#N/A	#N/A
1873	2015-07-16 13:00:00	0.0158603	0.0254777	0.0072
1874	2015-07-16 14:00:00	0.0164506	0.013	0.0072
1875	2015-07-16 15:00:00	0.0748297	0.013	0.0072
1876	2015-07-16 16:00:00	#N/A	#N/A	#N/A
1877	2015-07-16 17:00:00	0.0289635	0.013	0.00959758
1878	2015-07-16 18:00:00	0.0174008	0.013	0.0072
1879	2015-07-16 19:00:00	0.146042	0.013	0.0342046
1880	2015-07-16 20:00:00	#N/A	#N/A	#N/A
1881	2015-07-16 21:00:00	0.0203367	0.013	0.00801634
1882	2015-07-16 22:00:00	0.0381231	0.013	0.0072
1883	2015-07-16 23:00:00	0.0167416	0.013	0.0072
1884	2015-07-17	#N/A	#N/A	#N/A
1885	2015-07-17 01:00:00	0.0523013	0.013	0.0072
1886	2015-07-17 02:00:00	0.0470564	0.013	0.0072
1887	2015-07-17 03:00:00	0.0500069	0.013	0.0072
1888	2015-07-17 04:00:00	#N/A	#N/A	#N/A
1889	2015-07-17 05:00:00	0.0697967	0.013	0.0072
1890	2015-07-17 06:00:00	0.0926711	0.013	0.0072
1891	2015-07-17 07:00:00	0.04909	0.013	0.0072
1892	2015-07-17 08:00:00	#N/A	#N/A	#N/A
1893	2015-07-17 09:00:00	0.025643	0.013	0.0237513
1894	2015-07-17 10:00:00	0.0223959	0.0515834	0.0072
1895	2015-07-17 11:00:00	0.0196055	0.013	0.0072
1896	2015-07-17 12:00:00	#N/A	#N/A	#N/A
1897	2015-07-17 13:00:00	0.0639575	0.013	0.0072
1898	2015-07-17 14:00:00	0.0236971	0.0329669	0.0072
1899	2015-07-17 15:00:00	0.0170314	0.013	0.0315911
1900	2015-07-17 16:00:00	#N/A	#N/A	#N/A
1901	2015-07-17 17:00:00	0.00487462	0.0242938	0.00992126
1902	2015-07-17 18:00:00	0.0353346	0.013	0.0159842
1903	2015-07-17 19:00:00	0.013855	0.013	0.0072
1904	2015-07-17 20:00:00	#N/A	#N/A	#N/A
1905	2015-07-17 21:00:00	0.0117879	0.0366552	0.0072
1906	2015-07-17 22:00:00	0.09206	0.013	0.0072
1907	2015-07-17 23:00:00	0.0800783	0.0224619	0.0072
1908	2015-07-18	#N/A	#N/A	#N/A
1909	2015-07-18 01:00:00	0.119814	0.0692235	0.0072
1910	2015-07-18 02:00:00	0.0145995	0.0727598	0.0315817
1911	2015-07-18 03:00:00	0.118937	0.013	0.0072
1912	2015-07-18 04:00:00	#N/A	#N/A	#N/A
1913	2015-07-18 05:00:00	0.0587751	0.013	0.053483
1914	2015-07-18 06:00:00	0.0353017	0.0207712	0.0072
1915	2015-07-18 07:00:00	0.029033	0.0215559	0.0315268
1916	2015-07-18 08:00:00	#N/A	#N/A	#N/A
1917	2015-07-18 09:00:00	0.0526953	0.013	0.0072
1918	2015-07-18 10:00:00	0.0497015	0.013	0.0072
1919	2015-07-18 11:00:00	0.0377805	0.013	0.0072
1920	2015-07-18 12:00:00	#N/A	#N/A	#N/A
1921	2015-07-18 13:00:00	0.0561428	0.013	0.0072
1922	2015-07-18 14:00:00	0.0299676	0.013	0.0072
1923	2015-07-18 15:00:00	0.0251541	0.013	0.00789193
1924	2015-07-18 16:00:00	#N/A	#N/A	#N/A
1925	2015-07-18 17:00:00	0.0118275	0.0425887	0.0072
1926	2015-07-18 18:00:00	0.0941112	0.013	0.0370969
1927	2015-07-18 19:00:00	0.01721	0.013	0.0072
1928	2015-07-18 20:00:00	#N/A	#N/A	#N/A
1929	2015-07-18 21:00:00	0.125555	0.013	0.0412038
1930	2015-07-18 22:00:00	0.149586	0.013	0.0589641
1931	2015-07-18 23:00:00	0.0129925	0.013	0.0339913
1932	2015-07-19	#N/A	#N/A	#N/A
1933	2015-07-19 01:00:00	0.101514	0.013	0.0072
1934	2015-07-19 02:00:00	0.153156	0.013	0.0373224
1935	2015-07-19 03:00:00	0.0998125	0.013	0.0072
1936	2015-07-19 04:00:00	#N/A	#N/A	#N/A
1937	2015-07-19 05:00:00	0.0595526	0.013	0.0072
1938	2015-07-19 06:00:00	0.0953935	0.013	0.0072
1939	2015-07-19 07:00:00	0.0122775	0.0611877	0.0150584
1940	2015-07-19 08:00:00	#N/A	#N/A	#N/A
1941	2015-07-19 09:00:00	0.0602377	0.0599359	0.0169254
1942	2015-07-19 10:00:00	0.0995108	0.013	0.0072
1943	2015-07-19 11:00:00	0.189489	0.013	0.0319222
1944	2015-07-19 12:00:00	#N/A	#N/A	#N/A
1945	2015-07-19 13:00:00	0.100543	0.013	0.0072
1946	2015-07-19 14:00:00	0.0996114	0.013	0.0072
1947	2015-07-19 15:00:00	0.0609232	0.0193135	0.00986389
1948	2015-07-19 16:00:00	#N/A	#N/A	#N/A
1949	2015-07-19 17:00:00	0.0626412	0.013	0.0072
1950	2015-07-19 18:00:00	0.0710407	0.013	0.0072
1951	2015-07-19 19:00:00	0.0411743	0.013	0.0072
1952	2015-07-19 20:00:00	#N/A	#N/A	#N/A
1953	2015-07-19 21:00:00	0.0384576	0.0625293	0.0072
1954	2015-07-19 22:00:00	0.0671967	0.013	0.0150476
1955	2015-07-19 23:00:00	0.0953611	0.013	0.0072
1956	2015-07-20	#N/A	#N/A	#N/A
1957	2015-07-20 01:00:00	0.178462	0.013	0.0072
1958	2015-07-20 02:00:00	0.202253	0.013	0.12877
1959	2015-07-20 03:00:00	0.154786	0.013	0.0572097
1960	2015-07-20 04:00:00	#N/A	#N/A	#N/A
1961	2015-07-20 05:00:00	0.125921	0.013	0.0441431
1962	2015-07-20 06:00:00	0.109561	0.013	0.0072
1963	2015-07-20 07:00:00	0.100668	0.013	0.0072
1964	2015-07-20 08:00:00	#N/A	#N/A	#N/A
1965	2015-07-20 09:00:00	0.0998578	0.013	0.0072
1966	2015-07-20 10:00:00	#N/A	#N/A	#N/A
1967	2015-07-20 11:00:00	#N/A	#N/A	#N/A
1968	2015-07-20 12:00:00	#N/A	#N/A	#N/A
1969	2015-07-20 13:00:00	#N/A	#N/A	#N/A
1970	2015-07-20 14:00:00	#N/A	#N/A	#N/A
1971	2015-07-20 15:00:00	#N/A	#N/A	#N/A
1972	2015-07-20 16:00:00	#N/A	#N/A	#N/A
1973	2015-07-20 17:00:00	#N/A	#N/A	#N/A
1974	2015-07-20 18:00:00	#N/A	#N/A	#N/A
1975	2015-07-20 19:00:00	#N/A	#N/A	#N/A
1976	2015-07-20 20:00:00	#N/A	#N/A	#N/A
1977	2015-07-20 21:00:00	#N/A	#N/A	#N/A
1978	2015-07-20 22:00:00	#N/A	#N/A	#N/A
1979	2015-07-20 23:00:00	#N/A	#N/A	#N/A
1980	2015-07-21	#N/A	#N/A	#N/A
1981	2015-07-21 01:00:00	#N/A	#N/A	#N/A
1982	2015-07-21 02:00:00	#N/A	#N/A	#N/A
1983	2015-07-21 03:00:00	#N/A	#N/A	#N/A
1984	2015-07-21 04:00:00	#N/A	#N/A	#N/A
1985	2015-07-21 05:00:00	#N/A	#N/A	#N/A
1986	2015-07-21 06:00:00	#N/A	#N/A	#N/A
1987	2015-07-21 07:00:00	#N/A	#N/A	#N/A
1988	2015-07-21 08:00:00	#N/A	#N/A	#N/A
1989	2015-07-21 09:00:00	#N/A	#N/A	#N/A
1990	2015-07-21 10:00:00	#N/A	#N/A	#N/A
1991	2015-07-21 11:00:00	#N/A	#N/A	#N/A
1992	2015-07-21 12:00:00	#N/A	#N/A	#N/A
1993	2015-07-21 13:00:00	#N/A	#N/A	#N/A
1994	2015-07-21 14:00:00	#N/A	#N/A	#N/A
1995	2015-07-21 15:00:00	#N/A	#N/A	#N/A
1996	2015-07-21 16:00:00	#N/A	#N/A	#N/A
1997	2015-07-21 17:00:00	#N/A	#N/A	#N/A
1998	2015-07-21 18:00:00	#N/A	#N/A	#N/A
1999	2015-07-21 19:00:00	#N/A	#N/A	#N/A
[truncated: 2,223 more rows]

## Sheet: Rn-Smooth
	Date	Short	Long	Const
1	2015-04-29 13:00:00	0.0738588	0.0194221	0.0241488
2	2015-04-29 14:00:00	0.0739765	0.0194221	0.0236273
3	2015-04-29 15:00:00	0.0756445	0.0194221	0.0231058
4	2015-04-29 16:00:00	0.0750881	0.0194221	0.0268594
5	2015-04-29 17:00:00	0.0750304	0.0194221	0.030501
6	2015-04-29 18:00:00	0.0754487	0.0178166	0.030501
7	2015-04-29 19:00:00	0.0770551	0.016211	0.030501
8	2015-04-29 20:00:00	0.0755632	0.016211	0.030501
9	2015-04-29 21:00:00	0.0734448	0.016211	0.0297509
10	2015-04-29 22:00:00	0.0707036	0.016211	0.0298683
11	2015-04-29 23:00:00	0.0713384	0.016211	0.027535
12	2015-04-30	0.0715841	0.016211	0.0243759
13	2015-04-30 01:00:00	0.0715453	0.016211	0.0235328
14	2015-04-30 02:00:00	0.0719226	0.0162788	0.0203737
15	2015-04-30 03:00:00	0.0718995	0.0163466	0.0186211
16	2015-04-30 04:00:00	0.0707291	0.0163466	0.0184345
17	2015-04-30 05:00:00	0.0690849	0.0163466	0.0177003
18	2015-04-30 06:00:00	0.0688648	0.0163466	0.0177161
19	2015-04-30 07:00:00	0.0695339	0.0156079	0.0177161
20	2015-04-30 08:00:00	0.0686827	0.0148691	0.0177898
21	2015-04-30 09:00:00	0.0666664	0.0148691	0.0178635
22	2015-04-30 10:00:00	0.0661969	0.0148691	0.0178635
23	2015-04-30 11:00:00	0.0673693	0.0148691	0.017342
24	2015-04-30 12:00:00	0.0669656	0.0148691	0.0168205
25	2015-04-30 13:00:00	0.0675757	0.0148691	0.0168205
26	2015-04-30 14:00:00	0.0688528	0.0148691	0.0168205
27	2015-04-30 15:00:00	0.0683136	0.0153493	0.0168205
28	2015-04-30 16:00:00	0.0684724	0.0158294	0.0149437
29	2015-04-30 17:00:00	0.0687697	0.0158294	0.0112461
30	2015-04-30 18:00:00	0.0684863	0.0160331	0.00942526
31	2015-04-30 19:00:00	0.0671441	0.0167218	0.0104952
32	2015-04-30 20:00:00	0.0664013	0.0172068	0.011565
33	2015-04-30 21:00:00	0.066974	0.0172068	0.011565
34	2015-04-30 22:00:00	0.0680067	0.0172068	0.0111227
35	2015-04-30 23:00:00	0.0706538	0.0172068	0.0106803
36	2015-05-01	0.0726889	0.0172068	0.0106803
37	2015-05-01 01:00:00	0.0730415	0.0172068	0.0106803
38	2015-05-01 02:00:00	0.0727724	0.017139	0.0106803
39	2015-05-01 03:00:00	0.0736287	0.0170712	0.0102035
40	2015-05-01 04:00:00	0.0743422	0.0171581	0.00984274
41	2015-05-01 05:00:00	0.0739228	0.017245	0.00994286
42	2015-05-01 06:00:00	0.0730287	0.017245	0.00992701
43	2015-05-01 07:00:00	0.0732305	0.0163782	0.00992701
44	2015-05-01 08:00:00	0.0748186	0.0155115	0.00985333
45	2015-05-01 09:00:00	0.0746137	0.016523	0.00979996
46	2015-05-01 10:00:00	0.0732707	0.018141	0.00982027
47	2015-05-01 11:00:00	0.0724957	0.0187474	0.00982027
48	2015-05-01 12:00:00	0.0728864	0.0187474	0.00982027
49	2015-05-01 13:00:00	0.0713893	0.0187474	0.00982027
50	2015-05-01 14:00:00	0.0746805	0.0187474	0.00982027
51	2015-05-01 15:00:00	0.0800734	0.0182673	0.00982027
52	2015-05-01 16:00:00	0.0794528	0.0184908	0.0098275
53	2015-05-01 17:00:00	0.0778343	0.0199912	0.00985137
54	2015-05-01 18:00:00	0.0775643	0.0205842	0.00986802
55	2015-05-01 19:00:00	0.0785668	0.0204955	0.00879813
56	2015-05-01 20:00:00	0.0805963	0.0206106	0.00772824
57	2015-05-01 21:00:00	0.0822795	0.0206106	0.00772824
58	2015-05-01 22:00:00	0.0822208	0.0206106	0.00772824
59	2015-05-01 23:00:00	0.0794643	0.0206106	0.00772824
60	2015-05-02	0.0764402	0.0206106	0.00772824
61	2015-05-02 01:00:00	0.075983	0.0206106	0.00772824
62	2015-05-02 02:00:00	0.0760366	0.0206106	0.00772824
63	2015-05-02 03:00:00	0.0744387	0.0206106	0.00762427
64	2015-05-02 04:00:00	0.0723018	0.0205237	0.00740433
65	2015-05-02 05:00:00	0.0735984	0.0204368	0.00737724
66	2015-05-02 06:00:00	0.0749314	0.0206282	0.00746612
67	2015-05-02 07:00:00	0.0737929	0.0208195	0.00746612
68	2015-05-02 08:00:00	0.0755833	0.0208195	0.00758435
69	2015-05-02 09:00:00	0.0794713	0.019808	0.00768228
70	2015-05-02 10:00:00	0.0814799	0.01819	0.00786336
71	2015-05-02 11:00:00	0.0822965	0.0175836	0.00806474
72	2015-05-02 12:00:00	0.0821959	0.0175836	0.00806474
73	2015-05-02 13:00:00	0.0823227	0.0175836	0.00806474
74	2015-05-02 14:00:00	0.0779137	0.0175836	0.00806474
75	2015-05-02 15:00:00	0.0727613	0.0185839	0.00806474
76	2015-05-02 16:00:00	0.0730818	0.0188806	0.00805751
77	2015-05-02 17:00:00	0.0753813	0.0173802	0.00803364
78	2015-05-02 18:00:00	0.0774806	0.0165834	0.008017
79	2015-05-02 19:00:00	0.0792014	0.0159834	0.008017
80	2015-05-02 20:00:00	0.0797267	0.0153834	0.008017
81	2015-05-02 21:00:00	0.0792823	0.0154954	0.008017
82	2015-05-02 22:00:00	0.0789358	0.0156075	0.008017
83	2015-05-02 23:00:00	0.0789512	0.0156075	0.008017
84	2015-05-03	0.0796665	0.0156075	0.008017
85	2015-05-03 01:00:00	0.082265	0.0156075	0.008017
86	2015-05-03 02:00:00	0.085283	0.0156075	0.008017
87	2015-05-03 03:00:00	0.0855736	0.0157408	0.008017
88	2015-05-03 04:00:00	0.0854402	0.0163269	0.00814183
89	2015-05-03 05:00:00	0.0835879	0.017184	0.00817779
90	2015-05-03 06:00:00	0.0843618	0.017397	0.00831068
91	2015-05-03 07:00:00	0.0880003	0.0172056	0.00853245
92	2015-05-03 08:00:00	0.0866794	0.0172056	0.00841421
93	2015-05-03 09:00:00	0.0834581	0.0174089	0.00829598
94	2015-05-03 10:00:00	0.0843231	0.0176121	0.00809459
95	2015-05-03 11:00:00	0.0854252	0.0183789	0.00789321
96	2015-05-03 12:00:00	0.0841695	0.020233	0.00789321
97	2015-05-03 13:00:00	0.0843172	0.0213203	0.00789321
98	2015-05-03 14:00:00	0.0843936	0.0213203	0.00789321
99	2015-05-03 15:00:00	0.0852861	0.02032	0.00789321
100	2015-05-03 16:00:00	0.0861914	0.0193197	0.00789321
101	2015-05-03 17:00:00	0.0852581	0.0193197	0.00789321
102	2015-05-03 18:00:00	0.0833187	0.0194717	0.00789321
103	2015-05-03 19:00:00	0.080607	0.0196237	0.00789321
104	2015-05-03 20:00:00	0.0782154	0.0196237	0.00789321
105	2015-05-03 21:00:00	0.0766131	0.0196512	0.0079721
106	2015-05-03 22:00:00	0.0761706	0.0196788	0.00805099
107	2015-05-03 23:00:00	0.0751422	0.0205506	0.00805099
108	2015-05-04	0.0743355	0.0214224	0.00812451
109	2015-05-04 01:00:00	0.0721422	0.0214224	0.00819802
110	2015-05-04 02:00:00	0.0689125	0.0219143	0.00819802
111	2015-05-04 03:00:00	0.0686127	0.0222728	0.00819802
112	2015-05-04 04:00:00	0.0699517	0.0216867	0.00807319
113	2015-05-04 05:00:00	0.071193	0.0208296	0.00794836
114	2015-05-04 06:00:00	0.0702959	0.0204253	0.00772659
115	2015-05-04 07:00:00	0.0700377	0.0204253	0.00750482
116	2015-05-04 08:00:00	0.070361	0.0204253	0.00750482
117	2015-05-04 09:00:00	0.069932	0.020222	0.00750482
118	2015-05-04 10:00:00	0.067787	0.0200187	0.00750482
119	2015-05-04 11:00:00	0.0685907	0.019252	0.00750482
120	2015-05-04 12:00:00	0.0720816	0.0173979	0.00750482
121	2015-05-04 13:00:00	0.0713342	0.0163105	0.00750482
122	2015-05-04 14:00:00	0.06974	0.0165755	0.00750482
123	2015-05-04 15:00:00	0.0685719	0.0168405	0.00750482
124	2015-05-04 16:00:00	0.0698844	0.0168405	0.00750482
125	2015-05-04 17:00:00	0.0715291	0.0168405	0.00754452
126	2015-05-04 18:00:00	0.070758	0.0166886	0.00758423
127	2015-05-04 19:00:00	0.0698414	0.0165366	0.00758423
128	2015-05-04 20:00:00	0.0702679	0.0165366	0.00758423
129	2015-05-04 21:00:00	0.0726719	0.0163969	0.00750534
130	2015-05-04 22:00:00	0.0740655	0.0162573	0.00742645
131	2015-05-04 23:00:00	0.0742508	0.0153855	0.00742645
132	2015-05-05	0.0737125	0.0145819	0.00735293
133	2015-05-05 01:00:00	0.0730665	0.0146501	0.00727942
134	2015-05-05 02:00:00	0.0735346	0.0141583	0.00727942
135	2015-05-05 03:00:00	0.0731854	0.0136664	0.00727942
136	2015-05-05 04:00:00	0.074707	0.0136664	0.00727942
137	2015-05-05 05:00:00	0.0765762	0.0136664	0.00727942
138	2015-05-05 06:00:00	0.0756515	0.0136664	0.00727942
139	2015-05-05 07:00:00	0.072519	0.0143486	0.00727942
140	2015-05-05 08:00:00	0.0708786	0.0150307	0.00727942
141	2015-05-05 09:00:00	0.0744864	0.0150307	0.00727942
142	2015-05-05 10:00:00	0.0771401	0.0155238	0.00745092
143	2015-05-05 11:00:00	0.0757328	0.0160168	0.00762242
144	2015-05-05 12:00:00	0.0748217	0.0160168	0.00762242
145	2015-05-05 13:00:00	0.0795247	0.0160168	0.00762242
146	2015-05-05 14:00:00	0.0868646	0.0157518	0.00762242
147	2015-05-05 15:00:00	0.0889332	0.0154868	0.00763927
148	2015-05-05 16:00:00	0.0860995	0.0154868	0.00765613
149	2015-05-05 17:00:00	0.0851465	0.0154868	0.00761642
150	2015-05-05 18:00:00	0.0872727	0.0154868	0.00757671
151	2015-05-05 19:00:00	0.0882973	0.0158906	0.00757671
152	2015-05-05 20:00:00	0.0870285	0.0162945	0.00757671
153	2015-05-05 21:00:00	0.0853145	0.0162945	0.00757671
154	2015-05-05 22:00:00	0.0859873	0.0162945	0.00757671
155	2015-05-05 23:00:00	0.0870554	0.0162945	0.00757671
156	2015-05-06	0.0871487	0.0162263	0.00757671
157	2015-05-06 01:00:00	0.0864859	0.0161581	0.00757671
158	2015-05-06 02:00:00	0.0852901	0.0161581	0.00757671
159	2015-05-06 03:00:00	0.0849794	0.0161581	0.00757671
160	2015-05-06 04:00:00	0.0821831	0.0161581	0.00757671
161	2015-05-06 05:00:00	0.0791154	0.0161581	0.00757671
162	2015-05-06 06:00:00	0.0784802	0.0161581	0.00757671
163	2015-05-06 07:00:00	0.0785155	0.0154759	0.00757671
164	2015-05-06 08:00:00	0.0779181	0.0147938	0.00782192
165	2015-05-06 09:00:00	0.0736796	0.0147938	0.00806712
166	2015-05-06 10:00:00	0.0707724	0.0143007	0.00789562
167	2015-05-06 11:00:00	0.0684792	0.0138076	0.00787152
168	2015-05-06 12:00:00	0.06537	0.0138076	0.00801893
169	2015-05-06 13:00:00	0.060513	0.0138076	0.00801893
170	2015-05-06 14:00:00	0.0542943	0.0138076	0.00809621
171	2015-05-06 15:00:00	0.0515403	0.0138076	0.00815664
172	2015-05-06 16:00:00	0.0504539	0.0138076	0.00813979
173	2015-05-06 17:00:00	0.0487288	0.0138076	0.00813979
174	2015-05-06 18:00:00	0.0463998	0.0138076	0.00813979
175	2015-05-06 19:00:00	0.047227	0.0134038	0.00813979
176	2015-05-06 20:00:00	0.0488805	0.013	0.00813979
177	2015-05-06 21:00:00	0.048445	0.013	0.00858261
178	2015-05-06 22:00:00	0.0494424	0.013	0.00902544
179	2015-05-06 23:00:00	0.0507557	0.0134885	0.00902544
180	2015-05-07	0.0510852	0.013977	0.00902544
181	2015-05-07 01:00:00	0.0518894	0.013977	0.00902544
182	2015-05-07 02:00:00	0.0533647	0.013977	0.00902544
183	2015-05-07 03:00:00	0.054164	0.013977	0.00902544
184	2015-05-07 04:00:00	0.0539391	0.013977	0.00902544
185	2015-05-07 05:00:00	0.0546878	0.013977	0.00902544
186	2015-05-07 06:00:00	0.0556302	0.013977	0.00902544
187	2015-05-07 07:00:00	0.0559082	0.013977	0.00902544
188	2015-05-07 08:00:00	0.0572928	0.013977	0.00885735
189	2015-05-07 09:00:00	0.0593661	0.013977	0.00887669
190	2015-05-07 10:00:00	0.0600834	0.013977	0.00906412
191	2015-05-07 11:00:00	0.0612337	0.013977	0.00891672
192	2015-05-07 12:00:00	0.0647541	0.013977	0.00876931
193	2015-05-07 13:00:00	0.066303	0.013977	0.00876931
194	2015-05-07 14:00:00	0.0668563	0.013977	0.00869203
195	2015-05-07 15:00:00	0.0694261	0.013977	0.00866354
196	2015-05-07 16:00:00	0.0703442	0.013977	0.00871233
197	2015-05-07 17:00:00	0.0697318	0.013977	0.00871233
198	2015-05-07 18:00:00	0.0694035	0.013977	0.00871233
199	2015-05-07 19:00:00	0.0695096	0.013977	0.00871233
200	2015-05-07 20:00:00	0.0688757	0.013977	0.00871233
201	2015-05-07 21:00:00	0.0675583	0.013977	0.00826951
202	2015-05-07 22:00:00	0.0644002	0.013977	0.00782668
203	2015-05-07 23:00:00	0.0614201	0.0136898	0.00782668
204	2015-05-08	0.0625046	0.0134026	0.00782668
205	2015-05-08 01:00:00	0.0637786	0.0134026	0.00782668
206	2015-05-08 02:00:00	0.0624395	0.0134026	0.00782668
207	2015-05-08 03:00:00	0.0615423	0.0134026	0.00782668
208	2015-05-08 04:00:00	0.0612411	0.0138842	0.00782668
209	2015-05-08 05:00:00	0.0601195	0.0143658	0.00782668
210	2015-05-08 06:00:00	0.0586803	0.0144193	0.00782668
211	2015-05-08 07:00:00	0.0585586	0.0144727	0.00782668
212	2015-05-08 08:00:00	0.0590197	0.0144727	0.00774957
213	2015-05-08 09:00:00	0.0579972	0.0144727	0.00748502
214	2015-05-08 10:00:00	0.0564923	0.0151534	0.00729759
215	2015-05-08 11:00:00	0.0557316	0.015834	0.00729759
216	2015-05-08 12:00:00	0.0545504	0.015834	0.00729759
217	2015-05-08 13:00:00	0.05387	0.015834	0.00729759
218	2015-05-08 14:00:00	0.0520477	0.015834	0.00729759
219	2015-05-08 15:00:00	0.0535756	0.015834	0.00724879
220	2015-05-08 16:00:00	0.057759	0.015834	0.0072
221	2015-05-08 17:00:00	0.0583078	0.015834	0.0072
222	2015-05-08 18:00:00	0.0587643	0.015834	0.0072
223	2015-05-08 19:00:00	0.0580872	0.015834	0.0072
224	2015-05-08 20:00:00	0.0578221	0.015834	0.0072
225	2015-05-08 21:00:00	0.0588759	0.015834	0.0072
226	2015-05-08 22:00:00	0.0585715	0.0162109	0.00720771
227	2015-05-08 23:00:00	0.0602426	0.0163865	0.00721542
228	2015-05-09	0.0610501	0.0161852	0.00721542
229	2015-05-09 01:00:00	0.0602459	0.0161852	0.00721542
230	2015-05-09 02:00:00	0.0635752	0.0161852	0.00721542
231	2015-05-09 03:00:00	0.0673045	0.0161852	0.00721542
232	2015-05-09 04:00:00	0.0687028	0.0167518	0.00721542
233	2015-05-09 05:00:00	0.0699316	0.0173184	0.00721542
234	2015-05-09 06:00:00	0.0739448	0.017265	0.00721542
235	2015-05-09 07:00:00	0.0766982	0.0172116	0.00721542
236	2015-05-09 08:00:00	0.0751599	0.017701	0.00721542
237	2015-05-09 09:00:00	0.0747971	0.0181903	0.00721542
238	2015-05-09 10:00:00	0.0761784	0.0179125	0.00721542
239	2015-05-09 11:00:00	0.0766926	0.0176347	0.00721542
240	2015-05-09 12:00:00	0.0778441	0.0176347	0.00721542
241	2015-05-09 13:00:00	0.0799031	0.0176347	0.00741191
242	2015-05-09 14:00:00	0.0800297	0.0185187	0.0076084
243	2015-05-09 15:00:00	0.0774745	0.0194026	0.0076084
244	2015-05-09 16:00:00	0.0779639	0.0194026	0.00773287
245	2015-05-09 17:00:00	0.0802788	0.0194026	0.00785733
246	2015-05-09 18:00:00	0.0807512	0.0194026	0.00785733
247	2015-05-09 19:00:00	0.0808525	0.0196323	0.00785733
248	2015-05-09 20:00:00	0.0825265	0.019862	0.00785733
249	2015-05-09 21:00:00	0.084496	0.019862	0.00785733
250	2015-05-09 22:00:00	0.0847042	0.0199536	0.00784962
251	2015-05-09 23:00:00	0.0836547	0.0200453	0.00784191
252	2015-05-10	0.0822835	0.0200453	0.00784191
253	2015-05-10 01:00:00	0.0815807	0.0207976	0.00786205
254	2015-05-10 02:00:00	0.0782717	0.0215499	0.00788219
255	2015-05-10 03:00:00	0.0744538	0.0218825	0.00788219
256	2015-05-10 04:00:00	0.0778801	0.0211668	0.00788219
257	2015-05-10 05:00:00	0.0858263	0.0201185	0.00788219
258	2015-05-10 06:00:00	0.0870846	0.0201185	0.00788219
259	2015-05-10 07:00:00	0.0888187	0.0201185	0.00788219
260	2015-05-10 08:00:00	0.0927416	0.0203541	0.00788219
261	2015-05-10 09:00:00	0.0922928	0.0214624	0.00788219
262	2015-05-10 10:00:00	0.0921197	0.0223048	0.00793155
263	2015-05-10 11:00:00	0.0919759	0.0234726	0.00798091
264	2015-05-10 12:00:00	0.0899781	0.0246709	0.00798091
265	2015-05-10 13:00:00	0.0874602	0.0253096	0.00778442
266	2015-05-10 14:00:00	0.0903875	0.0250644	0.00758793
267	2015-05-10 15:00:00	0.0930081	0.0241805	0.00758793
268	2015-05-10 16:00:00	0.089739	0.0253847	0.00746346
269	2015-05-10 17:00:00	0.0875401	0.0270679	0.007339
270	2015-05-10 18:00:00	0.0859134	0.028703	0.007339
271	2015-05-10 19:00:00	0.085434	0.0296296	0.007339
272	2015-05-10 20:00:00	0.0847259	0.0294	0.007339
273	2015-05-10 21:00:00	0.0837312	0.0294	0.007339
274	2015-05-10 22:00:00	0.0845445	0.0301107	0.007339
275	2015-05-10 23:00:00	0.0849086	0.0309996	0.00735198
276	2015-05-11	0.0869028	0.0311777	0.00736497
277	2015-05-11 01:00:00	0.0883168	0.0312933	0.00734482
278	2015-05-11 02:00:00	0.0895439	0.0314088	0.00732468
279	2015-05-11 03:00:00	0.093523	0.0310763	0.00732468
280	2015-05-11 04:00:00	0.096419	0.0307437	0.00732468
281	2015-05-11 05:00:00	0.0929549	0.0307437	0.00732468
282	2015-05-11 06:00:00	0.0879243	0.0315157	0.00732468
283	2015-05-11 07:00:00	0.084867	0.0322876	0.00732468
284	2015-05-11 08:00:00	0.0828036	0.0322713	0.00732468
285	2015-05-11 09:00:00	0.0849865	0.0313821	0.00747356
286	2015-05-11 10:00:00	0.0863942	0.0305408	0.00757307
287	2015-05-11 11:00:00	0.0854439	0.0299788	0.00752372
288	2015-05-11 12:00:00	0.0867149	0.0293852	0.00752372
289	2015-05-11 13:00:00	0.0888524	0.0287464	0.00752372
290	2015-05-11 14:00:00	0.087597	0.0281077	0.00752372
291	2015-05-11 15:00:00	0.0848167	0.0286265	0.00752372
292	2015-05-11 16:00:00	0.0841846	0.028138	0.00752372
293	2015-05-11 17:00:00	0.0858193	0.0266518	0.00752372
294	2015-05-11 18:00:00	0.0898003	0.0250166	0.00757373
295	2015-05-11 19:00:00	0.0928061	0.0238604	0.00762375
296	2015-05-11 20:00:00	0.0942743	0.0238604	0.00762375
297	2015-05-11 21:00:00	0.0947682	0.0238604	0.00773571
298	2015-05-11 22:00:00	0.095066	0.022681	0.00784768
299	2015-05-11 23:00:00	0.0965729	0.0213236	0.00783469
300	2015-05-12	0.0946865	0.021942	0.00782504
301	2015-05-12 01:00:00	0.0928046	0.0228437	0.00782838
302	2015-05-12 02:00:00	0.0943673	0.0229489	0.00785012
303	2015-05-12 03:00:00	0.0952966	0.0229489	0.00796743
304	2015-05-12 04:00:00	0.092726	0.0229489	0.008063
305	2015-05-12 05:00:00	0.0906475	0.0229489	0.008063
306	2015-05-12 06:00:00	0.092441	0.022177	0.008063
307	2015-05-12 07:00:00	0.095462	0.021405	0.008063
308	2015-05-12 08:00:00	0.097212	0.0220896	0.008063
309	2015-05-12 09:00:00	0.0962091	0.0227741	0.00791413
310	2015-05-12 10:00:00	0.0964054	0.0223701	0.00776526
311	2015-05-12 11:00:00	0.100575	0.0213615	0.00776526
312	2015-05-12 12:00:00	0.102885	0.0207569	0.00776526
313	2015-05-12 13:00:00	0.102994	0.0207569	0.00776526
314	2015-05-12 14:00:00	0.103567	0.0211362	0.00776526
315	2015-05-12 15:00:00	0.104552	0.0213609	0.00776526
316	2015-05-12 16:00:00	0.106761	0.0210094	0.00776526
317	2015-05-12 17:00:00	0.108458	0.0208124	0.00776526
318	2015-05-12 18:00:00	0.111392	0.0208124	0.00771524
319	2015-05-12 19:00:00	0.11367	0.0209202	0.00766523
320	2015-05-12 20:00:00	0.113515	0.021028	0.00766523
321	2015-05-12 21:00:00	0.11332	0.0212478	0.00764127
322	2015-05-12 22:00:00	0.113484	0.0214677	0.0076238
323	2015-05-12 23:00:00	0.113538	0.0214677	0.00763028
324	2015-05-13	0.11373	0.0221321	0.00770373
325	2015-05-13 01:00:00	0.116472	0.0218234	0.00777717
326	2015-05-13 02:00:00	0.117428	0.0208503	0.00775543
327	2015-05-13 03:00:00	0.115112	0.0208503	0.00763812
328	2015-05-13 04:00:00	0.115029	0.0208503	0.00754255
329	2015-05-13 05:00:00	0.11575	0.0209342	0.00754255
330	2015-05-13 06:00:00	0.115481	0.0213434	0.00754255
331	2015-05-13 07:00:00	0.112124	0.0216686	0.00756453
332	2015-05-13 08:00:00	0.110245	0.0202755	0.00758652
333	2015-05-13 09:00:00	0.111321	0.0188824	0.00758652
334	2015-05-13 10:00:00	0.11132	0.0188824	0.00758652
335	2015-05-13 11:00:00	0.113963	0.0188824	0.00758652
336	2015-05-13 12:00:00	0.115666	0.0188824	0.00758652
337	2015-05-13 13:00:00	0.114575	0.0188824	0.00758652
338	2015-05-13 14:00:00	0.113328	0.020247	0.00758652
339	2015-05-13 15:00:00	0.11501	0.0212473	0.00758652
340	2015-05-13 16:00:00	0.117336	0.0208831	0.00758652
341	2015-05-13 17:00:00	0.115036	0.0221815	0.00758652
342	2015-05-13 18:00:00	0.10997	0.02348	0.00758652
343	2015-05-13 19:00:00	0.10519	0.0253654	0.00758652
344	2015-05-13 20:00:00	0.102798	0.0272507	0.00758652
345	2015-05-13 21:00:00	0.102647	0.0270309	0.00749851
346	2015-05-13 22:00:00	0.104207	0.0268111	0.00740402
347	2015-05-13 23:00:00	0.104992	0.0268111	0.00739753
348	2015-05-14	0.105059	0.0253502	0.00732075
349	2015-05-14 01:00:00	0.103619	0.0238893	0.00724397
350	2015-05-14 02:00:00	0.100608	0.0242673	0.00724397
351	2015-05-14 03:00:00	0.0979266	0.0246453	0.00724397
352	2015-05-14 04:00:00	0.0935389	0.0246453	0.00724397
353	2015-05-14 05:00:00	0.0923721	0.0245614	0.00740575
354	2015-05-14 06:00:00	0.0939823	0.0241522	0.00756754
355	2015-05-14 07:00:00	0.0936973	0.023827	0.00754556
356	2015-05-14 08:00:00	0.0926916	0.023827	0.0077442
357	2015-05-14 09:00:00	0.0909316	0.0242022	0.00796483
358	2015-05-14 10:00:00	0.0889395	0.0245774	0.00796483
359	2015-05-14 11:00:00	0.0837413	0.0245774	0.00804329
360	2015-05-14 12:00:00	0.078703	0.0245774	0.00812175
361	2015-05-14 13:00:00	0.077616	0.0245774	0.00812175
362	2015-05-14 14:00:00	0.0792669	0.0228336	0.00813709
363	2015-05-14 15:00:00	0.0774493	0.0210897	0.00815243
364	2015-05-14 16:00:00	0.0730882	0.0210897	0.00831012
365	2015-05-14 17:00:00	0.0725523	0.0197912	0.00846781
366	2015-05-14 18:00:00	0.0721889	0.0184928	0.00846781
367	2015-05-14 19:00:00	0.0718576	0.0169335	0.00846781
368	2015-05-14 20:00:00	0.0715011	0.0153742	0.00846781
369	2015-05-14 21:00:00	0.0703201	0.0153742	0.00846781
370	2015-05-14 22:00:00	0.0678411	0.01551	0.00846781
371	2015-05-14 23:00:00	0.0684857	0.0156459	0.00846781
372	2015-05-15	0.0707258	0.0156459	0.00846781
373	2015-05-15 01:00:00	0.070175	0.0156459	0.00846781
374	2015-05-15 02:00:00	0.0698161	0.0158782	0.00846781
375	2015-05-15 03:00:00	0.0701388	0.0161104	0.00846781
376	2015-05-15 04:00:00	0.070001	0.0162402	0.00846781
377	2015-05-15 05:00:00	0.0676515	0.0163699	0.00842389
378	2015-05-15 06:00:00	0.0661226	0.0163699	0.00837997
379	2015-05-15 07:00:00	0.0655066	0.0163699	0.00837997
380	2015-05-15 08:00:00	0.0638527	0.0163699	0.00815934
381	2015-05-15 09:00:00	0.0643082	0.0159947	0.00793872
382	2015-05-15 10:00:00	0.0678621	0.0156195	0.00793872
383	2015-05-15 11:00:00	0.0716201	0.0156195	0.00786025
384	2015-05-15 12:00:00	0.0732011	0.0156195	0.00778179
385	2015-05-15 13:00:00	0.0717443	0.0160131	0.00778179
386	2015-05-15 14:00:00	0.0681393	0.0164068	0.00776645
387	2015-05-15 15:00:00	0.0657325	0.0164068	0.00775111
388	2015-05-15 16:00:00	0.066277	0.0164068	0.00759342
389	2015-05-15 17:00:00	0.0663305	0.0164499	0.00743573
390	2015-05-15 18:00:00	0.0641953	0.0169827	0.00743573
391	2015-05-15 19:00:00	0.0634272	0.0170385	0.00743573
392	2015-05-15 20:00:00	0.063133	0.0166047	0.00743573
393	2015-05-15 21:00:00	0.062816	0.0166047	0.00743573
394	2015-05-15 22:00:00	0.0648556	0.0164688	0.00743573
395	2015-05-15 23:00:00	0.0631916	0.0163329	0.00743573
396	2015-05-16	0.0591706	0.0163329	0.00743573
397	2015-05-16 01:00:00	0.0571771	0.0163329	0.00743573
398	2015-05-16 02:00:00	0.0596902	0.0157227	0.00743573
399	2015-05-16 03:00:00	0.0622904	0.0151124	0.00743573
400	2015-05-16 04:00:00	0.0623917	0.0149827	0.00760209
401	2015-05-16 05:00:00	0.0621799	0.0148529	0.00765057
402	2015-05-16 06:00:00	0.0644178	0.0148529	0.00753271
403	2015-05-16 07:00:00	0.0682885	0.0148529	0.00753271
404	2015-05-16 08:00:00	0.0686132	0.0158448	0.00753271
405	2015-05-16 09:00:00	0.0685241	0.0168367	0.00753271
406	2015-05-16 10:00:00	0.0668287	0.0168367	0.00753271
407	2015-05-16 11:00:00	0.0637598	0.0168367	0.00753271
408	2015-05-16 12:00:00	0.0616274	0.0168367	0.00753271
409	2015-05-16 13:00:00	0.0626561	0.016443	0.00767277
410	2015-05-16 14:00:00	0.0642077	0.0160494	0.00781284
411	2015-05-16 15:00:00	0.0636922	0.0165358	0.00781284
412	2015-05-16 16:00:00	0.0616018	0.0170222	0.00781284
413	2015-05-16 17:00:00	0.0601155	0.0172282	0.00781284
414	2015-05-16 18:00:00	0.0611607	0.0169445	0.00781284
415	2015-05-16 19:00:00	0.0612919	0.0166301	0.00781284
416	2015-05-16 20:00:00	0.0609457	0.0168055	0.00781284
417	2015-05-16 21:00:00	0.0608535	0.0168055	0.00781284
418	2015-05-16 22:00:00	0.0583667	0.0169529	0.00785049
419	2015-05-16 23:00:00	0.0586312	0.0171003	0.00788814
420	2015-05-17	0.0636549	0.0171003	0.00788814
421	2015-05-17 01:00:00	0.0667553	0.0171003	0.00788814
422	2015-05-17 02:00:00	0.0637213	0.0171003	0.00788814
423	2015-05-17 03:00:00	0.0612639	0.0171003	0.00788814
424	2015-05-17 04:00:00	0.0611626	0.0171003	0.00772178
425	2015-05-17 05:00:00	0.0605999	0.0171003	0.00755543
426	2015-05-17 06:00:00	0.0561693	0.0175711	0.00755543
427	2015-05-17 07:00:00	0.0510025	0.0180418	0.00755543
428	2015-05-17 08:00:00	0.0505119	0.01705	0.00755543
429	2015-05-17 09:00:00	0.0487608	0.0162261	0.00755543
430	2015-05-17 10:00:00	0.0463818	0.0164356	0.00755543
431	2015-05-17 11:00:00	0.0455318	0.0164771	0.00755543
432	2015-05-17 12:00:00	0.0476457	0.0164771	0.00755543
433	2015-05-17 13:00:00	0.0487422	0.0164771	0.00741536
434	2015-05-17 14:00:00	0.0496826	0.0164771	0.0072753
435	2015-05-17 15:00:00	0.0526672	0.0159907	0.0072753
436	2015-05-17 16:00:00	0.0564349	0.0155043	0.0072753
437	2015-05-17 17:00:00	0.0594242	0.0152551	0.0072753
438	2015-05-17 18:00:00	0.0589572	0.015531	0.0072753
439	2015-05-17 19:00:00	0.0587149	0.0158805	0.0072753
440	2015-05-17 20:00:00	0.0611776	0.0157052	0.0072753
441	2015-05-17 21:00:00	0.0644186	0.0157052	0.00727623
442	2015-05-17 22:00:00	0.0693192	0.0155578	0.00723952
443	2015-05-17 23:00:00	0.0728573	0.0154104	0.00720187
444	2015-05-18	0.0702876	0.0156674	0.00720187
445	2015-05-18 01:00:00	0.0684502	0.0159243	0.00720187
446	2015-05-18 02:00:00	0.0737264	0.0159243	0.00720187
447	2015-05-18 03:00:00	0.0784261	0.0159243	0.00720187
448	2015-05-18 04:00:00	0.0781851	0.0159243	0.00720187
449	2015-05-18 05:00:00	0.0776245	0.0162356	0.00720187
450	2015-05-18 06:00:00	0.079722	0.0160762	0.00720187
451	2015-05-18 07:00:00	0.0819433	0.0156054	0.00720187
452	2015-05-18 08:00:00	0.0818278	0.0156054	0.00720187
453	2015-05-18 09:00:00	0.0839177	0.0154374	0.00720187
454	2015-05-18 10:00:00	0.0858392	0.0156368	0.00720187
455	2015-05-18 11:00:00	0.0850487	0.0160043	0.00720187
456	2015-05-18 12:00:00	0.082428	0.0160981	0.00720187
457	2015-05-18 13:00:00	0.081362	0.0161919	0.00720187
458	2015-05-18 14:00:00	0.0835281	0.0161919	0.00720187
459	2015-05-18 15:00:00	0.0840384	0.0169591	0.00722068
460	2015-05-18 16:00:00	0.0799654	0.0177263	0.00752848
461	2015-05-18 17:00:00	0.077112	0.0177263	0.00781747
462	2015-05-18 18:00:00	0.0815492	0.0172014	0.00781747
463	2015-05-18 19:00:00	0.0857475	0.0166765	0.00781747
464	2015-05-18 20:00:00	0.084066	0.0166765	0.00781747
465	2015-05-18 21:00:00	0.0803436	0.0170998	0.00781654
466	2015-05-18 22:00:00	0.0773875	0.017523	0.0078156
467	2015-05-18 23:00:00	0.0739307	0.0175499	0.0078156
468	2015-05-19	0.0712317	0.0173198	0.00787006
469	2015-05-19 01:00:00	0.0705078	0.0170628	0.00792451
470	2015-05-19 02:00:00	0.0691957	0.0170628	0.00792451
471	2015-05-19 03:00:00	0.068338	0.0170628	0.00792451
472	2015-05-19 04:00:00	0.068091	0.0170628	0.00792451
473	2015-05-19 05:00:00	0.0680523	0.0167515	0.00792451
474	2015-05-19 06:00:00	0.066923	0.0164401	0.00792451
475	2015-05-19 07:00:00	0.0658583	0.0164401	0.00792451
476	2015-05-19 08:00:00	0.0663563	0.0164401	0.00792451
477	2015-05-19 09:00:00	0.06479	0.0164401	0.00792451
478	2015-05-19 10:00:00	0.0645709	0.0160312	0.00792451
479	2015-05-19 11:00:00	0.0655316	0.0156223	0.00792451
480	2015-05-19 12:00:00	0.0645844	0.0159517	0.00792451
481	2015-05-19 13:00:00	0.0632744	0.0162811	0.00792451
482	2015-05-19 14:00:00	0.0628413	0.0162811	0.00792451
483	2015-05-19 15:00:00	0.0632661	0.0155139	0.00854784
484	2015-05-19 16:00:00	0.0647045	0.0147467	0.00888218
485	2015-05-19 17:00:00	0.0658884	0.0147467	0.00859319
486	2015-05-19 18:00:00	0.0621952	0.0147467	0.00859319
487	2015-05-19 19:00:00	0.0586515	0.0147467	0.00859319
488	2015-05-19 20:00:00	0.0581552	0.0147467	0.00859319
489	2015-05-19 21:00:00	0.0594368	0.0143234	0.00923523
490	2015-05-19 22:00:00	0.0615115	0.0139002	0.00987727
491	2015-05-19 23:00:00	0.0619834	0.0138733	0.00987727
492	2015-05-20	0.0623882	0.0138465	0.00990018
493	2015-05-20 01:00:00	0.0633635	0.0138465	0.0099231
494	2015-05-20 02:00:00	0.0629954	0.0138465	0.0099231
495	2015-05-20 03:00:00	0.0613388	0.0142644	0.0099231
496	2015-05-20 04:00:00	0.0622314	0.0146823	0.0099231
497	2015-05-20 05:00:00	0.0636853	0.0149529	0.0099231
498	2015-05-20 06:00:00	0.0649899	0.0152235	0.0099231
499	2015-05-20 07:00:00	0.06607	0.0153098	0.0099231
500	2015-05-20 08:00:00	0.0658383	0.015503	0.0099231
501	2015-05-20 09:00:00	0.0665697	0.01561	0.0099231
502	2015-05-20 10:00:00	0.066342	0.01561	0.0099231
503	2015-05-20 11:00:00	0.0661697	0.01561	0.0099231
504	2015-05-20 12:00:00	0.0692486	0.0151868	0.0099231
505	2015-05-20 13:00:00	0.0752344	0.0147636	0.0099231
506	2015-05-20 14:00:00	0.0785786	0.0147636	0.0099231
507	2015-05-20 15:00:00	0.078885	0.0147636	0.00928096
508	2015-05-20 16:00:00	0.0781166	0.0157667	0.00863882
509	2015-05-20 17:00:00	0.0776952	0.0168799	0.00863882
510	2015-05-20 18:00:00	0.0789082	0.0172842	0.00863882
511	2015-05-20 19:00:00	0.0798279	0.0175784	0.00878484
512	2015-05-20 20:00:00	0.0813188	0.0175784	0.00893086
513	2015-05-20 21:00:00	0.0813472	0.0175784	0.00828883
514	2015-05-20 22:00:00	0.0822071	0.0175784	0.00764679
515	2015-05-20 23:00:00	0.0845478	0.0175784	0.00764679
516	2015-05-21	0.0855634	0.0175784	0.00756942
517	2015-05-21 01:00:00	0.0864172	0.0175784	0.00749204
518	2015-05-21 02:00:00	0.0843089	0.0187825	0.00749204
519	2015-05-21 03:00:00	0.0830359	0.0195721	0.00749204
520	2015-05-21 04:00:00	0.0844101	0.0191576	0.00749204
521	2015-05-21 05:00:00	0.0859184	0.018887	0.00749204
522	2015-05-21 06:00:00	0.0858636	0.0186164	0.00749204
523	2015-05-21 07:00:00	0.0862427	0.0185301	0.00749204
524	2015-05-21 08:00:00	0.0906765	0.0183369	0.00758157
525	2015-05-21 09:00:00	0.0935097	0.0182299	0.0076711
526	2015-05-21 10:00:00	0.0944823	0.0182299	0.0076711
527	2015-05-21 11:00:00	0.0956194	0.0182299	0.0076711
528	2015-05-21 12:00:00	0.0956733	0.0182299	0.0076711
529	2015-05-21 13:00:00	0.092897	0.0182299	0.0076711
530	2015-05-21 14:00:00	0.0868987	0.0192773	0.0076711
531	2015-05-21 15:00:00	0.0841229	0.0203248	0.00772663
532	2015-05-21 16:00:00	0.0857671	0.0193217	0.00778216
533	2015-05-21 17:00:00	0.0869477	0.0182084	0.00778216
534	2015-05-21 18:00:00	0.0886019	0.0178041	0.00778216
535	2015-05-21 19:00:00	0.0919493	0.01751	0.00763614
536	2015-05-21 20:00:00	0.0945291	0.01751	0.00749012
537	2015-05-21 21:00:00	0.0947551	0.01751	0.00749012
538	2015-05-21 22:00:00	0.0892379	0.01843	0.00749012
539	2015-05-21 23:00:00	0.0863104	0.0193501	0.00749012
540	2015-05-22	0.0887881	0.0193501	0.00749012
541	2015-05-22 01:00:00	0.0879892	0.0193501	0.0075436
542	2015-05-22 02:00:00	0.0889328	0.0181459	0.00759709
543	2015-05-22 03:00:00	0.0900628	0.0169384	0.00759709
544	2015-05-22 04:00:00	0.0876988	0.016935	0.00759709
545	2015-05-22 05:00:00	0.0856437	0.016935	0.00781232
546	2015-05-22 06:00:00	0.0878123	0.016935	0.00802754
547	2015-05-22 07:00:00	0.0884496	0.016935	0.00802754
548	2015-05-22 08:00:00	0.0832342	0.016935	0.00793801
549	2015-05-22 09:00:00	0.0793035	0.016935	0.00784848
550	2015-05-22 10:00:00	0.0765207	0.0166642	0.00769848
551	2015-05-22 11:00:00	0.0729265	0.0161225	0.00739848
552	2015-05-22 12:00:00	0.0689315	0.0155808	0.00709848
553	2015-05-22 13:00:00	0.0647613	0.0150392	0.00679848
554	2015-05-22 14:00:00	0.0620697	0.01345	0.00649848
555	2015-05-22 15:00:00	0.0592754	0.0118609	0.00614295
556	2015-05-22 16:00:00	0.0567662	0.0115901	0.00593743
557	2015-05-22 17:00:00	0.0556533	0.0115901	0.00595611
558	2015-05-22 18:00:00	0.055597	0.0115901	0.00604465
559	2015-05-22 19:00:00	0.0568605	0.0115901	0.00612491
560	2015-05-22 20:00:00	0.0569716	0.0115901	0.0061353
561	2015-05-22 21:00:00	0.0565766	0.0115901	0.0061353
562	2015-05-22 22:00:00	0.0592446	0.0106701	0.0061353
563	2015-05-22 23:00:00	#N/A	#N/A	#N/A
564	2015-05-23	#N/A	#N/A	#N/A
565	2015-05-23 01:00:00	#N/A	#N/A	#N/A
566	2015-05-23 02:00:00	#N/A	#N/A	#N/A
567	2015-05-23 03:00:00	0.0614581	0.00975	0.00700796
568	2015-05-23 04:00:00	0.0620994	0.00991233	0.00700796
569	2015-05-23 05:00:00	0.0619683	0.0100747	0.00679273
570	2015-05-23 06:00:00	0.0648891	0.0100747	0.00657751
571	2015-05-23 07:00:00	0.0685168	0.0100747	0.00657751
572	2015-05-23 08:00:00	0.0699199	0.0100747	0.00657751
573	2015-05-23 09:00:00	0.071376	0.0100747	0.00657751
574	2015-05-23 10:00:00	0.0774522	0.0103455	0.00672751
575	2015-05-23 11:00:00	0.0837058	0.0108872	0.00702751
576	2015-05-23 12:00:00	0.0856229	0.0114288	0.0073392
577	2015-05-23 13:00:00	0.0897735	0.0119705	0.00776689
578	2015-05-23 14:00:00	0.0942048	0.0137491	0.0081829
579	2015-05-23 15:00:00	0.0967564	0.015956	0.0084829
580	2015-05-23 16:00:00	0.0977217	0.0175016	0.0086329
581	2015-05-23 17:00:00	0.0972404	0.0192092	0.00861422
582	2015-05-23 18:00:00	0.096034	0.0200701	0.00852568
583	2015-05-23 19:00:00	0.0913648	0.0211152	0.00844542
584	2015-05-23 20:00:00	0.0881367	0.0221603	0.00843502
585	2015-05-23 21:00:00	0.0886712	0.0221603	0.00843502
586	2015-05-23 22:00:00	0.0870358	0.0224369	0.00843502
587	2015-05-23 23:00:00	0.0855663	0.0227134	0.00843502
588	2015-05-24	0.0862097	0.0227134	0.00794521
589	2015-05-24 01:00:00	0.0861764	0.0227134	0.00745539
590	2015-05-24 02:00:00	0.0824246	0.0227134	0.00745539
591	2015-05-24 03:00:00	0.0788294	0.0227134	0.00745539
592	2015-05-24 04:00:00	0.0792724	0.0225511	0.00745539
593	2015-05-24 05:00:00	0.0798603	0.0223887	0.00745539
594	2015-05-24 06:00:00	0.0741145	0.0223887	0.00745539
595	2015-05-24 07:00:00	0.0683896	0.0223887	0.00809922
596	2015-05-24 08:00:00	0.0686867	0.0223887	0.00874305
597	2015-05-24 09:00:00	0.0682631	0.0223887	0.00874305
598	2015-05-24 10:00:00	0.0637027	0.0223887	0.00874305
599	2015-05-24 11:00:00	0.0595927	0.0223887	0.00874305
600	2015-05-24 12:00:00	0.0586211	0.0223887	0.00889114
601	2015-05-24 13:00:00	0.0557157	0.0223887	0.00892322
602	2015-05-24 14:00:00	0.0524086	0.0211517	0.00886916
603	2015-05-24 15:00:00	0.0510935	0.0194865	0.0089311
604	2015-05-24 16:00:00	0.0508755	0.0182118	0.0089311
605	2015-05-24 17:00:00	0.0506247	0.0165042	0.0089311
606	2015-05-24 18:00:00	0.0495649	0.0156433	0.0089311
607	2015-05-24 19:00:00	0.048994	0.0145982	0.0089311
608	2015-05-24 20:00:00	0.0479547	0.0135531	0.00922759
609	2015-05-24 21:00:00	0.046288	0.0135531	0.00952407
610	2015-05-24 22:00:00	0.0459189	0.0132765	0.0109509
611	2015-05-24 23:00:00	0.0457188	0.013	0.0128883
612	2015-05-25	0.0450852	0.013	0.0133989
613	2015-05-25 01:00:00	0.0455457	0.013	0.0133989
614	2015-05-25 02:00:00	0.0454267	0.013	0.0133989
615	2015-05-25 03:00:00	0.0436681	0.013	0.0133989
616	2015-05-25 04:00:00	0.046378	0.013	0.0134134
617	2015-05-25 05:00:00	0.050615	0.013	0.0134279
618	2015-05-25 06:00:00	0.0509034	0.013	0.0134279
619	2015-05-25 07:00:00	0.0508947	0.013	0.0127841
620	2015-05-25 08:00:00	0.0511642	0.013	0.0121403
621	2015-05-25 09:00:00	0.054436	0.013	0.0129675
622	2015-05-25 10:00:00	0.0577846	0.013	0.0137948
623	2015-05-25 11:00:00	0.0581055	0.0133154	0.0138738
624	2015-05-25 12:00:00	0.0597094	0.0136307	0.0137931
625	2015-05-25 13:00:00	0.0614791	0.0136307	0.0136333
626	2015-05-25 14:00:00	0.0625832	0.0137587	0.0135714
627	2015-05-25 15:00:00	0.0629112	0.0138866	0.0135094
628	2015-05-25 16:00:00	0.0630612	0.0140786	0.0135094
629	2015-05-25 17:00:00	0.0634801	0.0142705	0.0135094
630	2015-05-25 18:00:00	0.0627298	0.014546	0.0135094
631	2015-05-25 19:00:00	0.0619562	0.0148215	0.0135094
632	2015-05-25 20:00:00	0.0620815	0.0148215	0.0135951
633	2015-05-25 21:00:00	0.0628357	0.0148215	0.0136807
634	2015-05-25 22:00:00	0.0640252	0.0148215	0.0122539
635	2015-05-25 23:00:00	0.0643106	0.0148215	0.0103165
636	2015-05-26	0.06393	0.0155527	0.00982301
637	2015-05-26 01:00:00	0.0634073	0.0162838	0.00984017
638	2015-05-26 02:00:00	0.0633259	0.0164654	0.00984017
639	2015-05-26 03:00:00	0.0642481	0.0166469	0.00984017
640	2015-05-26 04:00:00	0.0615754	0.0166469	0.00982566
641	2015-05-26 05:00:00	0.0578612	0.0166469	0.00981115
642	2015-05-26 06:00:00	0.0574656	0.0166469	0.00981115
643	2015-05-26 07:00:00	0.0586246	0.0166469	0.00998541
644	2015-05-26 08:00:00	0.0595233	0.0166469	0.0101597
645	2015-05-26 09:00:00	0.0563424	0.0166469	0.00933243
646	2015-05-26 10:00:00	0.0535358	0.0166469	0.00850519
647	2015-05-26 11:00:00	0.0536756	0.0163316	0.00842613
648	2015-05-26 12:00:00	0.0529569	0.0160162	0.00834706
649	2015-05-26 13:00:00	0.0514469	0.0162354	0.00862159
650	2015-05-26 14:00:00	0.0519313	0.0163266	0.00889611
651	2015-05-26 15:00:00	0.0536904	0.0161987	0.00889611
652	2015-05-26 16:00:00	0.0543223	0.0160067	0.00889611
653	2015-05-26 17:00:00	0.0580375	0.0158148	0.00889611
654	2015-05-26 18:00:00	0.0626123	0.0155393	0.00889611
655	2015-05-26 19:00:00	0.0636417	0.0152638	0.00889611
656	2015-05-26 20:00:00	0.0649525	0.0152638	0.00851401
657	2015-05-26 21:00:00	0.065074	0.0164281	0.0081319
658	2015-05-26 22:00:00	0.0632472	0.0183458	0.0081319
659	2015-05-26 23:00:00	0.0628238	0.0190992	0.0081319
660	2015-05-27	0.063073	0.0193787	0.00830224
661	2015-05-27 01:00:00	0.0628172	0.0196582	0.00847258
662	2015-05-27 02:00:00	0.0628438	0.0194766	0.0086945
663	2015-05-27 03:00:00	0.0634439	0.0192951	0.00891642
664	2015-05-27 04:00:00	0.0635179	0.0192951	0.00891642
665	2015-05-27 05:00:00	0.0630178	0.0192951	0.00891642
666	2015-05-27 06:00:00	0.0629098	0.0192951	0.00891642
667	2015-05-27 07:00:00	0.0642675	0.0192951	0.00888023
668	2015-05-27 08:00:00	0.0652693	0.0200074	0.00884404
669	2015-05-27 09:00:00	0.0653944	0.0207198	0.00884404
670	2015-05-27 10:00:00	0.065467	0.0207198	0.00884404
671	2015-05-27 11:00:00	0.0652664	0.0217125	0.00884404
672	2015-05-27 12:00:00	0.0663067	0.0227052	0.00884404
673	2015-05-27 13:00:00	0.0669289	0.0234928	0.00856951
674	2015-05-27 14:00:00	0.0661796	0.0242805	0.00829499
675	2015-05-27 15:00:00	0.0652036	0.0242805	0.00829499
676	2015-05-27 16:00:00	0.0643278	0.0242805	0.00842588
677	2015-05-27 17:00:00	0.0604765	0.0242805	0.00855677
678	2015-05-27 18:00:00	0.0564912	0.0242805	0.00891918
679	2015-05-27 19:00:00	0.0561445	0.0242805	0.00928159
680	2015-05-27 20:00:00	0.0556474	0.0242805	0.00928159
681	2015-05-27 21:00:00	0.056436	0.0231162	0.00928159
682	2015-05-27 22:00:00	0.0581432	0.0211985	0.00928159
683	2015-05-27 23:00:00	0.0587861	0.0204452	0.00928159
684	2015-05-28	0.0605326	0.0194345	0.00909408
685	2015-05-28 01:00:00	0.0642083	0.0184238	0.00915719
686	2015-05-28 02:00:00	0.0655567	0.0191766	0.00918588
687	2015-05-28 03:00:00	0.0673829	0.0199295	0.00905576
688	2015-05-28 04:00:00	0.0704759	0.0199295	0.00914756
689	2015-05-28 05:00:00	0.0719755	0.0199295	0.00914756
690	2015-05-28 06:00:00	0.0729061	0.0199295	0.00914756
691	2015-05-28 07:00:00	0.0716133	0.0199295	0.00900949
692	2015-05-28 08:00:00	0.0709353	0.0192171	0.00887142
693	2015-05-28 09:00:00	0.0713817	0.0185048	0.00887142
694	2015-05-28 10:00:00	0.073071	0.0185048	0.00887142
695	2015-05-28 11:00:00	0.0751246	0.0175121	0.00887142
696	2015-05-28 12:00:00	0.0746582	0.0165194	0.00887142
697	2015-05-28 13:00:00	0.0741678	0.0160395	0.00887142
698	2015-05-28 14:00:00	0.0741648	0.0155597	0.00887142
699	2015-05-28 15:00:00	0.0783887	0.0155597	0.00887142
700	2015-05-28 16:00:00	0.0834353	0.0155597	0.00874053
701	2015-05-28 17:00:00	0.0841728	0.016063	0.00860964
702	2015-05-28 18:00:00	0.0857223	0.0165663	0.00824723
703	2015-05-28 19:00:00	0.0873575	0.0165663	0.00788482
704	2015-05-28 20:00:00	0.0890969	0.0165663	0.00788482
705	2015-05-28 21:00:00	0.0904621	0.0165663	0.00788482
706	2015-05-28 22:00:00	0.0901138	0.0179782	0.00799812
707	2015-05-28 23:00:00	0.0921988	0.01939	0.00811142
708	2015-05-29	0.0949096	0.01939	0.00811142
709	2015-05-29 01:00:00	0.0931219	0.01939	0.00786081
710	2015-05-29 02:00:00	0.0914681	0.0186372	0.0076102
711	2015-05-29 03:00:00	0.0891752	0.0185426	0.0075184
712	2015-05-29 04:00:00	0.0865913	0.0194556	0.00742659
713	2015-05-29 05:00:00	0.0860362	0.0197104	0.00742659
714	2015-05-29 06:00:00	0.0855823	0.0197104	0.00742659
715	2015-05-29 07:00:00	0.0839064	0.0202482	0.00742659
716	2015-05-29 08:00:00	0.0837953	0.020786	0.00785141
717	2015-05-29 09:00:00	0.0844957	0.0217028	0.00840695
718	2015-05-29 10:00:00	0.0819939	0.0226196	0.00853769
719	2015-05-29 11:00:00	0.0814335	0.0226196	0.00853769
720	2015-05-29 12:00:00	0.0815287	0.0230725	0.00854134
721	2015-05-29 13:00:00	0.0827479	0.0229984	0.00854499
722	2015-05-29 14:00:00	0.0838074	0.0229025	0.00862436
723	2015-05-29 15:00:00	0.0783681	0.0234049	0.00870373
724	2015-05-29 16:00:00	0.0737288	0.0234761	0.00870373
725	2015-05-29 17:00:00	0.075569	0.0229728	0.00870373
726	2015-05-29 18:00:00	0.0759009	0.0224694	0.00870373
727	2015-05-29 19:00:00	0.0736977	0.0224694	0.00879496
728	2015-05-29 20:00:00	0.0714332	0.0224694	0.0088862
729	2015-05-29 21:00:00	0.0715751	0.0224694	0.0088862
730	2015-05-29 22:00:00	0.0739835	0.0210576	0.0087729
731	2015-05-29 23:00:00	0.0710129	0.0208088	0.00866038
732	2015-05-30	0.0679628	0.0219718	0.00876279
733	2015-05-30 01:00:00	0.0690709	0.0219718	0.00886442
734	2015-05-30 02:00:00	0.070774	0.0219718	0.00886442
735	2015-05-30 03:00:00	0.0729887	0.0213136	0.00886442
736	2015-05-30 04:00:00	0.07473	0.0204006	0.00886442
737	2015-05-30 05:00:00	0.074788	0.0201458	0.00886442
738	2015-05-30 06:00:00	0.0739874	0.0206597	0.00886442
739	2015-05-30 07:00:00	0.0742925	0.0206359	0.00886442
740	2015-05-30 08:00:00	0.0724572	0.0213015	0.0084396
741	2015-05-30 09:00:00	0.0704509	0.0223951	0.00788406
742	2015-05-30 10:00:00	0.0706076	0.0222853	0.00775332
743	2015-05-30 11:00:00	0.0693598	0.0225842	0.00775332
744	2015-05-30 12:00:00	0.0687444	0.0224809	0.00774967
745	2015-05-30 13:00:00	0.0684242	0.0220786	0.00774602
746	2015-05-30 14:00:00	0.0694403	0.0216475	0.00768752
747	2015-05-30 15:00:00	0.0712289	0.0223165	0.00762901
748	2015-05-30 16:00:00	0.0719662	0.0234166	0.00762901
749	2015-05-30 17:00:00	0.0714573	0.0234166	0.00762901
750	2015-05-30 18:00:00	0.0714321	0.024117	0.00762901
751	2015-05-30 19:00:00	0.0733761	0.0248174	0.00753778
752	2015-05-30 20:00:00	0.0742491	0.024965	0.00746382
753	2015-05-30 21:00:00	0.0729528	0.0251126	0.00748109
754	2015-05-30 22:00:00	0.0711902	0.0260179	0.00748109
755	2015-05-30 23:00:00	0.0721419	0.0257601	0.00748031
756	2015-05-31	0.0727181	0.0245971	0.00737791
757	2015-05-31 01:00:00	0.0711673	0.0256708	0.00727628
758	2015-05-31 02:00:00	0.0703954	0.0267446	0.00727628
759	2015-05-31 03:00:00	0.0697618	0.0267446	0.00727628
760	2015-05-31 04:00:00	0.0673777	0.0277125	0.00728437
761	2015-05-31 05:00:00	0.0684395	0.0286805	0.00729247
762	2015-05-31 06:00:00	0.0709733	0.029578	0.00729247
763	2015-05-31 07:00:00	0.0710103	0.0304754	0.00729247
764	2015-05-31 08:00:00	0.0722538	0.029272	0.00729247
765	2015-05-31 09:00:00	0.0739092	0.0281548	0.00733063
766	2015-05-31 10:00:00	0.0751218	0.0282409	0.0073688
767	2015-05-31 11:00:00	0.0794831	0.0279419	0.00757681
768	2015-05-31 12:00:00	0.0832967	0.0279426	0.00778482
769	2015-05-31 13:00:00	0.0825114	0.0282422	0.00778482
770	2015-05-31 14:00:00	0.0807263	0.0287213	0.00795636
771	2015-05-31 15:00:00	0.0800478	0.0284181	0.0081279
772	2015-05-31 16:00:00	0.0797596	0.0276359	0.0081279
773	2015-05-31 17:00:00	0.0809228	0.0276359	0.0081279
774	2015-05-31 18:00:00	0.082872	0.0269355	0.0081279
775	2015-05-31 19:00:00	0.0829026	0.0262351	0.0081279
776	2015-05-31 20:00:00	0.0831773	0.0260875	0.00811063
777	2015-05-31 21:00:00	0.0867616	0.0259399	0.00809335
778	2015-05-31 22:00:00	0.0894365	0.026322	0.00809335
779	2015-05-31 23:00:00	0.0883574	0.026704	0.00809335
780	2015-06-01	0.0875428	0.026704	0.00809335
781	2015-06-01 01:00:00	0.0901439	0.0256303	0.00809335
782	2015-06-01 02:00:00	0.0945655	0.0245566	0.00809335
783	2015-06-01 03:00:00	0.095726	0.0245566	0.00809335
784	2015-06-01 04:00:00	0.0966726	0.0235886	0.00808526
785	2015-06-01 05:00:00	0.100181	0.0226206	0.00807716
786	2015-06-01 06:00:00	0.102672	0.0212092	0.00807716
787	2015-06-01 07:00:00	0.102857	0.0197977	0.00807716
788	2015-06-01 08:00:00	0.102853	0.0197977	0.00807716
789	2015-06-01 09:00:00	0.105353	0.0189046	0.008039
790	2015-06-01 10:00:00	0.106464	0.0184201	0.00824816
791	2015-06-01 11:00:00	0.106452	0.0188287	0.00844034
792	2015-06-01 12:00:00	0.10845	0.0184784	0.00838519
793	2015-06-01 13:00:00	0.111062	0.0181282	0.00838519
794	2015-06-01 14:00:00	0.112766	0.0176492	0.00819279
795	2015-06-01 15:00:00	0.114663	0.016781	0.00800039
796	2015-06-01 16:00:00	0.116944	0.0163919	0.00800039
797	2015-06-01 17:00:00	0.118214	0.0163919	0.00800039
798	2015-06-01 18:00:00	0.118683	0.0163919	0.00800039
799	2015-06-01 19:00:00	0.1187	0.0163919	0.00800039
800	2015-06-01 20:00:00	0.119557	0.0163919	0.00800039
801	2015-06-01 21:00:00	0.116758	0.0163919	0.00800039
802	2015-06-01 22:00:00	0.114796	0.0151045	0.00800039
803	2015-06-01 23:00:00	0.116656	0.0138172	0.00800039
804	2015-06-02	0.116754	0.0138172	0.00811663
805	2015-06-02 01:00:00	0.113183	0.0142524	0.00823287
806	2015-06-02 02:00:00	0.107921	0.0146877	0.00823287
807	2015-06-02 03:00:00	0.105089	0.0146877	0.00823287
808	2015-06-02 04:00:00	0.103408	0.015031	0.00868712
809	2015-06-02 05:00:00	0.0968505	0.0156622	0.00914136
810	2015-06-02 06:00:00	0.0918915	0.0159501	0.00914136
811	2015-06-02 07:00:00	0.0917922	0.0159501	0.00914136
812	2015-06-02 08:00:00	0.0904331	0.0159501	0.00914136
813	2015-06-02 09:00:00	0.0867783	0.0159501	0.00914136
814	2015-06-02 10:00:00	0.0838876	0.0155415	0.00889404
815	2015-06-02 11:00:00	0.0783138	0.0151329	0.00849384
816	2015-06-02 12:00:00	0.0733735	0.0151329	0.00834097
817	2015-06-02 13:00:00	0.0713997	0.0160415	0.00834097
818	2015-06-02 14:00:00	0.0694948	0.0169501	0.00854249
819	2015-06-02 15:00:00	0.0676587	0.0171662	0.00874401
820	2015-06-02 16:00:00	0.0652979	0.0173822	0.00874401
821	2015-06-02 17:00:00	0.0616969	0.0173822	0.00874401
822	2015-06-02 18:00:00	0.0570723	0.0173822	0.00874401
823	2015-06-02 19:00:00	0.0555868	0.0173822	0.00874401
824	2015-06-02 20:00:00	0.0538053	0.0173822	0.00874401
825	2015-06-02 21:00:00	0.0528736	0.0173822	0.00874401
826	2015-06-02 22:00:00	0.0538761	0.0173822	0.00874401
827	2015-06-02 23:00:00	0.0557334	0.0173822	0.00874401
828	2015-06-03	0.0565687	0.0173822	0.00862777
829	2015-06-03 01:00:00	0.0574029	0.016947	0.00851153
830	2015-06-03 02:00:00	0.0574394	0.0165118	0.00851153
831	2015-06-03 03:00:00	0.0589048	0.0165118	0.00851153
832	2015-06-03 04:00:00	0.0614029	0.0161685	0.00805728
833	2015-06-03 05:00:00	0.0617959	0.0155373	0.00760304
834	2015-06-03 06:00:00	0.0607637	0.0152494	0.00760304
835	2015-06-03 07:00:00	0.0594291	0.0152494	0.00760304
836	2015-06-03 08:00:00	0.0592626	0.0152494	0.00761275
837	2015-06-03 09:00:00	0.0587928	0.0152494	0.00762247
838	2015-06-03 10:00:00	0.0590612	0.0152494	0.00762247
839	2015-06-03 11:00:00	0.0591551	0.0152494	0.00762247
840	2015-06-03 12:00:00	0.0569005	0.0152494	0.00762247
841	2015-06-03 13:00:00	0.0557449	0.0143713	0.00762247
842	2015-06-03 14:00:00	0.0553735	0.0134932	0.00742096
843	2015-06-03 15:00:00	0.0537445	0.0137763	0.00721944
844	2015-06-03 16:00:00	0.0519737	0.0140594	0.00721944
845	2015-06-03 17:00:00	0.0502116	0.0140594	0.0075586
846	2015-06-03 18:00:00	0.0499586	0.0140594	0.00789776
847	2015-06-03 19:00:00	0.0490363	0.0140594	0.00789776
848	2015-06-03 20:00:00	0.0476005	0.0140594	0.00789776
849	2015-06-03 21:00:00	0.0456504	0.0140594	0.00789776
850	2015-06-03 22:00:00	0.0432272	0.0140594	0.00818008
851	2015-06-03 23:00:00	0.0398719	0.0140594	0.00846239
852	2015-06-04	0.0368231	0.0140594	0.00846239
853	2015-06-04 01:00:00	0.0360081	0.0140594	0.00863399
854	2015-06-04 02:00:00	0.0356385	0.0140594	0.00880558
855	2015-06-04 03:00:00	0.0331444	0.0140594	0.00880558
856	2015-06-04 04:00:00	0.031513	0.0140594	0.00882652
857	2015-06-04 05:00:00	0.0318869	0.0140594	0.00884746
858	2015-06-04 06:00:00	0.0316633	0.0140594	0.00884746
859	2015-06-04 07:00:00	0.0321511	0.0140594	0.00884746
860	2015-06-04 08:00:00	0.0327578	0.0140594	0.00883774
861	2015-06-04 09:00:00	0.0334178	0.0140594	0.00882803
862	2015-06-04 10:00:00	0.0332481	0.014329	0.00882803
863	2015-06-04 11:00:00	0.0333091	0.0145985	0.00882803
864	2015-06-04 12:00:00	0.0344346	0.0145985	0.00882803
865	2015-06-04 13:00:00	0.0344991	0.0145679	0.00882803
866	2015-06-04 14:00:00	0.0353471	0.0145374	0.00882803
867	2015-06-04 15:00:00	0.0370245	0.0140382	0.00917075
868	2015-06-04 16:00:00	0.0372719	0.013539	0.00951347
869	2015-06-04 17:00:00	0.0386497	0.013539	0.0091743
870	2015-06-04 18:00:00	0.0402025	0.013539	0.00885075
871	2015-06-04 19:00:00	0.0407436	0.013539	0.00920657
872	2015-06-04 20:00:00	0.0426996	0.013539	0.00954678
873	2015-06-04 21:00:00	0.0441116	0.013539	0.00954678
874	2015-06-04 22:00:00	0.0434217	0.013539	0.00926447
875	2015-06-04 23:00:00	0.0432492	0.013539	0.00898215
876	2015-06-05	0.0457615	0.013539	0.00898215
877	2015-06-05 01:00:00	0.0466681	0.0137796	0.00881056
878	2015-06-05 02:00:00	0.0476725	0.0140202	0.00865149
879	2015-06-05 03:00:00	0.0496547	0.0140202	0.00866402
880	2015-06-05 04:00:00	0.0484078	0.0140202	0.00864308
881	2015-06-05 05:00:00	0.0504866	0.0140202	0.00862214
882	2015-06-05 06:00:00	0.0539321	0.0140202	0.00862214
883	2015-06-05 07:00:00	0.0538304	0.0140202	0.00862214
884	2015-06-05 08:00:00	0.0529656	0.0140202	0.00862214
885	2015-06-05 09:00:00	0.0524976	0.0140202	0.00862214
886	2015-06-05 10:00:00	0.0522859	0.0137506	0.00862214
887	2015-06-05 11:00:00	0.0527875	0.0134811	0.00896667
888	2015-06-05 12:00:00	0.0532333	0.0134811	0.0093112
889	2015-06-05 13:00:00	0.0537359	0.0134811	0.00936774
890	2015-06-05 14:00:00	0.0540229	0.0134811	0.00945659
891	2015-06-05 15:00:00	0.0538225	0.0134811	0.00914617
892	2015-06-05 16:00:00	0.0541477	0.0134811	0.00880345
893	2015-06-05 17:00:00	0.0536015	0.0134811	0.00880345
894	2015-06-05 18:00:00	0.0529451	0.0134811	0.00878784
895	2015-06-05 19:00:00	0.0529281	0.0134811	0.00843202
896	2015-06-05 20:00:00	0.052057	0.0134811	0.00809181
897	2015-06-05 21:00:00	0.0516205	0.0134811	0.00809181
898	2015-06-05 22:00:00	0.0523425	0.0134811	0.00809181
899	2015-06-05 23:00:00	0.0531533	0.0134811	0.00815167
900	2015-06-06	0.0519024	0.0134811	0.00823703
901	2015-06-06 01:00:00	0.050465	0.0132406	0.00826252
902	2015-06-06 02:00:00	0.0490888	0.013	0.00825
903	2015-06-06 03:00:00	0.0471546	0.013	0.00823747
904	2015-06-06 04:00:00	0.0487294	0.013	0.00823747
905	2015-06-06 05:00:00	0.047665	0.013	0.00823747
906	2015-06-06 06:00:00	0.0448626	0.013	0.00823747
907	2015-06-06 07:00:00	0.0456215	0.013	0.00823747
908	2015-06-06 08:00:00	0.0466666	0.013	0.00823747
909	2015-06-06 09:00:00	0.0466706	0.013	0.0086738
910	2015-06-06 10:00:00	0.0466812	0.013	0.00911014
911	2015-06-06 11:00:00	0.0471808	0.013	0.00876561
912	2015-06-06 12:00:00	0.0469565	0.013	0.00842108
913	2015-06-06 13:00:00	0.0464097	0.013	0.00836454
914	2015-06-06 14:00:00	0.0454621	0.013	0.00827569
915	2015-06-06 15:00:00	0.045442	0.013	0.00824339
916	2015-06-06 16:00:00	0.0463519	0.013	0.00824339
917	2015-06-06 17:00:00	0.0462979	0.013	0.00824339
918	2015-06-06 18:00:00	0.0480289	0.013	0.00832343
919	2015-06-06 19:00:00	0.0501573	0.013	0.00840346
920	2015-06-06 20:00:00	0.050202	0.013	0.00840346
921	2015-06-06 21:00:00	0.0496207	0.013	0.00840346
922	2015-06-06 22:00:00	0.048619	0.0133426	0.00840346
923	2015-06-06 23:00:00	0.0476954	0.0138124	0.0083436
924	2015-06-07	0.0468455	0.0146545	0.00853006
925	2015-06-07 01:00:00	0.046817	0.0153694	0.00877638
926	2015-06-07 02:00:00	0.0477722	0.0153694	0.00877638
927	2015-06-07 03:00:00	0.0485473	0.0153694	0.00877638
928	2015-06-07 04:00:00	0.0469829	0.0153694	0.00877638
929	2015-06-07 05:00:00	0.0454518	0.0153694	0.00877638
930	2015-06-07 06:00:00	0.0454277	0.0153694	0.00877638
931	2015-06-07 07:00:00	0.0446608	0.0153694	0.00877638
932	2015-06-07 08:00:00	0.0444042	0.0153694	0.00877638
933	2015-06-07 09:00:00	0.0450143	0.0153694	0.00841501
934	2015-06-07 10:00:00	0.0455925	0.0153694	0.00805364
935	2015-06-07 11:00:00	0.0452178	0.0153694	0.00805364
936	2015-06-07 12:00:00	0.0453437	0.0153694	0.00805364
937	2015-06-07 13:00:00	0.0468985	0.0153694	0.00805704
938	2015-06-07 14:00:00	0.0492883	0.0153694	0.00836154
939	2015-06-07 15:00:00	0.0511959	0.0153694	0.00890665
940	2015-06-07 16:00:00	0.0526179	0.0153694	0.00919349
941	2015-06-07 17:00:00	0.0537517	0.0153694	0.00923634
942	2015-06-07 18:00:00	0.0513175	0.0154617	0.0091563
943	2015-06-07 19:00:00	0.048145	0.0155943	0.00907627
944	2015-06-07 20:00:00	0.0496111	0.0156346	0.00907627
945	2015-06-07 21:00:00	0.0523462	0.0156346	0.00907627
946	2015-06-07 22:00:00	0.0548395	0.015292	0.00907627
947	2015-06-07 23:00:00	0.0561689	0.0148222	0.00907627
948	2015-06-08	0.0566053	0.0139801	0.00880445
949	2015-06-08 01:00:00	0.0574502	0.0132652	0.00853263
950	2015-06-08 02:00:00	0.057157	0.0132652	0.00853263
951	2015-06-08 03:00:00	0.0571721	0.0132652	0.00853263
952	2015-06-08 04:00:00	0.0577434	0.0132652	0.00853263
953	2015-06-08 05:00:00	0.0584562	0.0132652	0.00853263
954	2015-06-08 06:00:00	0.0587186	0.0132652	0.00853263
955	2015-06-08 07:00:00	0.0580801	0.0139587	0.00853263
956	2015-06-08 08:00:00	0.0569837	0.0153071	0.00853263
957	2015-06-08 09:00:00	0.0571229	0.0159619	0.00845767
958	2015-06-08 10:00:00	0.0626241	0.0159619	0.00838907
959	2015-06-08 11:00:00	0.0667813	0.0162907	0.00839544
960	2015-06-08 12:00:00	0.0680249	0.0166196	0.00839544
961	2015-06-08 13:00:00	0.0686545	0.0169996	0.00839204
962	2015-06-08 14:00:00	0.0684479	0.0173796	0.00808753
963	2015-06-08 15:00:00	0.0694766	0.0173796	0.00754243
964	2015-06-08 16:00:00	0.0709866	0.0173796	0.00727492
965	2015-06-08 17:00:00	0.0727025	0.0173796	0.00725141
966	2015-06-08 18:00:00	0.0746417	0.0172873	0.00725141
967	2015-06-08 19:00:00	0.0766272	0.0176638	0.00725141
968	2015-06-08 20:00:00	0.0740385	0.0188161	0.00725141
969	2015-06-08 21:00:00	0.0732908	0.0194996	0.00752013
970	2015-06-08 22:00:00	0.0732017	0.0194996	0.00778886
971	2015-06-08 23:00:00	0.0719372	0.0196651	0.00778886
972	2015-06-09	0.0757439	0.0198307	0.00778886
973	2015-06-09 01:00:00	0.0792784	0.0202782	0.00778886
974	2015-06-09 02:00:00	0.0821001	0.0207257	0.00778886
975	2015-06-09 03:00:00	0.0846224	0.0207257	0.00778886
976	2015-06-09 04:00:00	0.0849532	0.0210156	0.00778886
977	2015-06-09 05:00:00	0.0849111	0.0213055	0.00778886
978	2015-06-09 06:00:00	0.0896574	0.0213055	0.00778886
979	2015-06-09 07:00:00	0.0958056	0.020612	0.00778886
980	2015-06-09 08:00:00	0.101015	0.0192637	0.00778886
981	2015-06-09 09:00:00	0.103967	0.0200937	0.00781406
982	2015-06-09 10:00:00	0.099114	0.0215786	0.00783289
983	2015-06-09 11:00:00	0.0956683	0.022384	0.00818447
984	2015-06-09 12:00:00	0.0953099	0.0231893	0.00854294
985	2015-06-09 13:00:00	0.0978162	0.0228093	0.00854346
986	2015-06-09 14:00:00	0.101618	0.0224293	0.00854346
987	2015-06-09 15:00:00	0.102158	0.0224293	0.00854346
988	2015-06-09 16:00:00	0.100302	0.0228048	0.00852413
989	2015-06-09 17:00:00	0.098908	0.0231803	0.0085048
990	2015-06-09 18:00:00	0.0978644	0.0239133	0.0085048
991	2015-06-09 19:00:00	0.0969202	0.0250647	0.0085048
992	2015-06-09 20:00:00	0.0992075	0.0247995	0.0085048
993	2015-06-09 21:00:00	0.09973	0.024116	0.00823607
994	2015-06-09 22:00:00	0.101225	0.024116	0.00796735
995	2015-06-09 23:00:00	0.104173	0.0239504	0.00796735
996	2015-06-10	0.101249	0.0245182	0.00796735
997	2015-06-10 01:00:00	0.0978964	0.0248039	0.00796735
998	2015-06-10 02:00:00	0.100786	0.0243564	0.00796735
999	2015-06-10 03:00:00	0.103688	0.0243564	0.00796735
1000	2015-06-10 04:00:00	0.103451	0.0240665	0.00796735
1001	2015-06-10 05:00:00	0.103149	0.0237766	0.00796735
1002	2015-06-10 06:00:00	0.0998288	0.0237766	0.00796735
1003	2015-06-10 07:00:00	0.096499	0.0237766	0.00796735
1004	2015-06-10 08:00:00	0.0933097	0.0237766	0.00796735
1005	2015-06-10 09:00:00	0.091293	0.0222917	0.00794215
1006	2015-06-10 10:00:00	0.0915013	0.0208067	0.00791695
1007	2015-06-10 11:00:00	0.0910532	0.0196726	0.007559
1008	2015-06-10 12:00:00	0.0920501	0.0185384	0.00726109
1009	2015-06-10 13:00:00	0.0900356	0.0185384	0.00749657
1010	2015-06-10 14:00:00	0.0847032	0.0185384	0.007672
1011	2015-06-10 15:00:00	0.0809219	0.0185384	0.00782246
1012	2015-06-10 16:00:00	0.0796894	0.018163	0.00797292
1013	2015-06-10 17:00:00	0.0827208	0.0177875	0.00797292
1014	2015-06-10 18:00:00	0.0868003	0.0170544	0.00797292
1015	2015-06-10 19:00:00	0.0898069	0.0153939	0.00797292
1016	2015-06-10 20:00:00	0.0909059	0.0149386	0.00797292
1017	2015-06-10 21:00:00	0.0919759	0.0154105	0.00797292
1018	2015-06-10 22:00:00	0.0913709	0.0157724	0.00797292
1019	2015-06-10 23:00:00	0.0884927	0.0163315	0.00797292
1020	2015-06-11	0.0884172	0.0157955	0.00797292
1021	2015-06-11 01:00:00	0.0894585	0.0150622	0.00797292
1022	2015-06-11 02:00:00	0.0857499	0.0150622	0.00797292
1023	2015-06-11 03:00:00	0.0824084	0.0150622	0.00797292
1024	2015-06-11 04:00:00	0.083865	0.0150622	0.00797292
1025	2015-06-11 05:00:00	0.0837224	0.0150622	0.00797292
1026	2015-06-11 06:00:00	0.0841637	0.0150622	0.00797292
1027	2015-06-11 07:00:00	0.08452	0.0150622	0.00797292
1028	2015-06-11 08:00:00	0.0837147	0.0150622	0.00797292
1029	2015-06-11 09:00:00	0.0827681	0.0150622	0.00797292
1030	2015-06-11 10:00:00	0.0814659	0.0150622	0.00797292
1031	2015-06-11 11:00:00	0.0802571	0.0150622	0.00797292
1032	2015-06-11 12:00:00	0.0778187	0.0150622	0.00791236
1033	2015-06-11 13:00:00	0.0753743	0.0150622	0.00767636
1034	2015-06-11 14:00:00	0.0742573	0.0150622	0.00750092
1035	2015-06-11 15:00:00	0.0735954	0.0150622	0.00736802
1036	2015-06-11 16:00:00	0.0739471	0.0150622	0.00760579
1037	2015-06-11 17:00:00	0.0705803	0.0150622	0.00797646
1038	2015-06-11 18:00:00	0.0662016	0.0150622	0.00797646
1039	2015-06-11 19:00:00	0.0633077	0.0150622	0.00797646
1040	2015-06-11 20:00:00	0.0623678	0.0145902	0.00797646
1041	2015-06-11 21:00:00	0.0598769	0.0141182	0.00797646
1042	2015-06-11 22:00:00	0.0555038	0.0138919	0.00804112
1043	2015-06-11 23:00:00	0.0539492	0.0134683	0.00810578
1044	2015-06-12	0.0525193	0.013271	0.00810578
1045	2015-06-12 01:00:00	0.0512982	0.013271	0.00855704
1046	2015-06-12 02:00:00	0.0495255	0.013271	0.00900831
1047	2015-06-12 03:00:00	0.0464329	0.013271	0.00900831
1048	2015-06-12 04:00:00	0.0439489	0.013271	0.00900831
1049	2015-06-12 05:00:00	0.0433789	0.013271	0.00900831
1050	2015-06-12 06:00:00	0.0406956	0.013271	0.00900831
1051	2015-06-12 07:00:00	0.0382055	0.013271	0.00900831
1052	2015-06-12 08:00:00	0.0379233	0.013271	0.00900831
1053	2015-06-12 09:00:00	0.0369256	0.013271	0.00900831
1054	2015-06-12 10:00:00	0.0381747	0.013271	0.00919831
1055	2015-06-12 11:00:00	0.0396475	0.013271	0.00952128
1056	2015-06-12 12:00:00	0.0389193	0.013271	0.00965423
1057	2015-06-12 13:00:00	0.0385724	0.013271	0.00965423
1058	2015-06-12 14:00:00	0.0380223	0.013271	0.00965423
1059	2015-06-12 15:00:00	0.0383235	0.013271	0.00963667
1060	2015-06-12 16:00:00	0.038087	0.013271	0.00924844
1061	2015-06-12 17:00:00	0.0386982	0.013271	0.00930569
1062	2015-06-12 18:00:00	0.0394997	0.013271	0.00973361
1063	2015-06-12 19:00:00	0.0384872	0.013271	0.00973361
1064	2015-06-12 20:00:00	0.0369025	0.013271	0.00973361
1065	2015-06-12 21:00:00	0.0354611	0.0134956	0.00973361
1066	2015-06-12 22:00:00	0.0362956	0.0135848	0.00966895
1067	2015-06-12 23:00:00	0.0374223	0.0134493	0.0096043
1068	2015-06-13	0.0379756	0.0134493	0.0096043
1069	2015-06-13 01:00:00	0.0375498	0.0134493	0.00915303
1070	2015-06-13 02:00:00	0.0376138	0.0134493	0.00940717
1071	2015-06-13 03:00:00	0.0388119	0.0134493	0.0101126
1072	2015-06-13 04:00:00	0.039884	0.0134493	0.0102039
1073	2015-06-13 05:00:00	0.0410045	0.0134493	0.0102952
1074	2015-06-13 06:00:00	0.0424658	0.0134493	0.0102952
1075	2015-06-13 07:00:00	0.0434368	0.0134493	0.0102952
1076	2015-06-13 08:00:00	0.0441399	0.0134493	0.0102952
1077	2015-06-13 09:00:00	0.0468625	0.0134493	0.0103463
1078	2015-06-13 10:00:00	0.046562	0.0135438	0.0102075
1079	2015-06-13 11:00:00	0.0442907	0.0140855	0.00994619
1080	2015-06-13 12:00:00	0.0442801	0.0145329	0.0098749
1081	2015-06-13 13:00:00	0.0455718	0.0145329	0.0098749
1082	2015-06-13 14:00:00	0.0469901	0.0145329	0.0098749
1083	2015-06-13 15:00:00	0.046742	0.0145329	0.0098749
1084	2015-06-13 16:00:00	0.0468663	0.0145329	0.0098749
1085	2015-06-13 17:00:00	0.0457645	0.0145329	0.00944698
1086	2015-06-13 18:00:00	0.0445437	0.0145329	0.00901906
1087	2015-06-13 19:00:00	0.0455072	0.0145329	0.00901906
1088	2015-06-13 20:00:00	0.0461392	0.0145329	0.00901906
1089	2015-06-13 21:00:00	0.0468633	0.0143082	0.00901906
1090	2015-06-13 22:00:00	0.0472667	0.0140836	0.00901906
1091	2015-06-13 23:00:00	0.0479578	0.0140836	0.00901906
1092	2015-06-14	0.0490831	0.0140836	0.00901906
1093	2015-06-14 01:00:00	0.0512767	0.0140836	0.00901906
1094	2015-06-14 02:00:00	0.0525785	0.0140836	0.00831365
1095	2015-06-14 03:00:00	0.0525039	0.0140836	0.00760824
1096	2015-06-14 04:00:00	0.0524649	0.0140836	0.00751694
1097	2015-06-14 05:00:00	0.0516647	0.0140836	0.00742564
1098	2015-06-14 06:00:00	0.0536234	0.0140836	0.00769855
1099	2015-06-14 07:00:00	0.0578945	0.0140836	0.00849873
1100	2015-06-14 08:00:00	0.0585226	0.0138127	0.008876
1101	2015-06-14 09:00:00	0.0556838	0.0135419	0.00867484
1102	2015-06-14 10:00:00	0.0551089	0.0134475	0.00862368
1103	2015-06-14 11:00:00	0.0569381	0.0129057	0.00856202
1104	2015-06-14 12:00:00	0.0575507	0.0121875	0.00835036
1105	2015-06-14 13:00:00	0.0562777	0.0119167	0.00820036
1106	2015-06-14 14:00:00	0.0560627	0.0119167	0.00820036
1107	2015-06-14 15:00:00	0.0568313	0.0119167	0.00820036
1108	2015-06-14 16:00:00	0.0559021	0.0116458	0.00805036
1109	2015-06-14 17:00:00	0.0550846	0.011375	0.00790036
1110	2015-06-14 18:00:00	0.0559156	0.011375	0.00790036
1111	2015-06-14 19:00:00	0.0565653	0.011375	0.00790036
1112	2015-06-14 20:00:00	0.0557539	0.0111042	0.00775036
1113	2015-06-14 21:00:00	0.0552038	0.0108333	0.00760036
1114	2015-06-14 22:00:00	0.0557231	0.0108333	0.00760042
1115	2015-06-14 23:00:00	0.0560758	0.0108333	0.00760048
1116	2015-06-15	0.0551025	0.0105625	0.00745048
1117	2015-06-15 01:00:00	0.0520006	0.0111064	0.00753573
1118	2015-06-15 02:00:00	0.0541512	0.0119211	0.00783154
1119	2015-06-15 03:00:00	0.0579057	0.0119211	0.00789211
1120	2015-06-15 04:00:00	0.056974	0.0116503	0.00774211
1121	2015-06-15 05:00:00	0.0573719	0.0113795	0.00759211
1122	2015-06-15 06:00:00	0.0558321	0.0120854	0.00731919
1123	2015-06-15 07:00:00	0.0524564	0.0127913	0.00651901
1124	2015-06-15 08:00:00	0.0516683	0.0127913	0.00599175
1125	2015-06-15 09:00:00	0.0526046	0.0127913	0.00599175
1126	2015-06-15 10:00:00	0.0554602	0.0127913	0.00599175
1127	2015-06-15 11:00:00	0.0570935	0.0139573	0.00610992
1128	2015-06-15 12:00:00	0.0568074	0.0151234	0.00622809
1129	2015-06-15 13:00:00	0.0602386	0.0151234	0.00622809
1130	2015-06-15 14:00:00	0.0642976	0.016014	0.00622809
1131	2015-06-15 15:00:00	0.0657668	0.0169046	0.00622809
1132	2015-06-15 16:00:00	0.0666084	0.0169046	0.00622809
1133	2015-06-15 17:00:00	0.0710688	0.0169046	0.00622809
1134	2015-06-15 18:00:00	0.076483	0.0169046	0.00622809
1135	2015-06-15 19:00:00	0.0773961	0.0193974	0.00622809
1136	2015-06-15 20:00:00	0.0773554	0.0218902	0.00622809
1137	2015-06-15 21:00:00	0.0787158	0.0218902	0.00622809
1138	2015-06-15 22:00:00	0.0802833	0.0233396	0.00622803
1139	2015-06-15 23:00:00	0.0813097	0.024789	0.00622796
1140	2015-06-16	0.082129	0.024789	0.00622796
1141	2015-06-16 01:00:00	0.0832475	0.0240094	0.00599357
1142	2015-06-16 02:00:00	0.0811322	0.0232298	0.00569862
1143	2015-06-16 03:00:00	0.0771968	0.0243227	0.00563805
1144	2015-06-16 04:00:00	0.0764952	0.0254155	0.00563805
1145	2015-06-16 05:00:00	0.07633	0.0254155	0.00563805
1146	2015-06-16 06:00:00	0.0765925	0.0247096	0.00573955
1147	2015-06-16 07:00:00	0.0766047	0.0240036	0.00584104
1148	2015-06-16 08:00:00	0.0761893	0.0240036	0.00584104
1149	2015-06-16 09:00:00	0.0755809	0.0240036	0.00584104
1150	2015-06-16 10:00:00	0.0728157	0.0240036	0.00584104
1151	2015-06-16 11:00:00	0.0727252	0.0228376	0.00581021
1152	2015-06-16 12:00:00	0.0747917	0.0216716	0.00577938
1153	2015-06-16 13:00:00	0.0736215	0.0216716	0.00582819
1154	2015-06-16 14:00:00	0.0722997	0.020781	0.00596323
1155	2015-06-16 15:00:00	0.0716175	0.0198904	0.00604946
1156	2015-06-16 16:00:00	0.0710869	0.0198904	0.00604946
1157	2015-06-16 17:00:00	0.0669156	0.0198904	0.00604946
1158	2015-06-16 18:00:00	0.0612655	0.0198904	0.00604946
1159	2015-06-16 19:00:00	0.0596096	0.0173976	0.00604946
1160	2015-06-16 20:00:00	0.0594324	0.0149047	0.00604946
1161	2015-06-16 21:00:00	0.0589642	0.0149047	0.00604946
1162	2015-06-16 22:00:00	0.0584507	0.0134553	0.00604946
1163	2015-06-16 23:00:00	0.0569443	0.0120059	0.00604946
1164	2015-06-17	0.0554832	0.0120059	0.00604946
1165	2015-06-17 01:00:00	0.0542545	0.0119708	0.00604861
1166	2015-06-17 02:00:00	0.0519045	0.0119357	0.00604775
1167	2015-06-17 03:00:00	0.0515194	0.0108428	0.00604775
1168	2015-06-17 04:00:00	0.0522557	0.00975	0.00604775
1169	2015-06-17 05:00:00	0.0511418	0.00975	0.00604775
1170	2015-06-17 06:00:00	0.0486547	0.010219	0.00594626
1171	2015-06-17 07:00:00	0.0464472	0.0106879	0.00584477
1172	2015-06-17 08:00:00	0.045613	0.0106879	0.00584477
1173	2015-06-17 09:00:00	0.0455087	0.0106879	0.00584477
1174	2015-06-17 10:00:00	0.046588	0.0106879	0.00645237
1175	2015-06-17 11:00:00	0.0456505	0.0109123	0.00697264
1176	2015-06-17 12:00:00	0.0435294	0.0111368	0.0068853
1177	2015-06-17 13:00:00	0.0422432	0.0111368	0.00683649
1178	2015-06-17 14:00:00	0.0406063	0.0111368	0.00670145
1179	2015-06-17 15:00:00	0.0406211	0.0111368	0.00661522
1180	2015-06-17 16:00:00	0.0409866	0.0111368	0.00661522
1181	2015-06-17 17:00:00	0.043534	0.0111368	0.00724482
1182	2015-06-17 18:00:00	0.0466213	0.0111368	0.00787443
1183	2015-06-17 19:00:00	0.0465776	0.0126315	0.00821745
1184	2015-06-17 20:00:00	0.0459941	0.0141261	0.00856046
1185	2015-06-17 21:00:00	0.045057	0.0143998	0.00856046
1186	2015-06-17 22:00:00	0.0439251	0.0146735	0.00884554
1187	2015-06-17 23:00:00	0.0436762	0.0146735	0.00913061
1188	2015-06-18	0.0436222	0.0146735	0.00913061
1189	2015-06-18 01:00:00	0.04342	0.0146735	0.00913061
1190	2015-06-18 02:00:00	0.0435593	0.0146735	0.00913061
1191	2015-06-18 03:00:00	0.0437419	0.0146735	0.00913061
1192	2015-06-18 04:00:00	0.043583	0.0146735	0.00913061
1193	2015-06-18 05:00:00	0.043792	0.0146735	0.00913061
1194	2015-06-18 06:00:00	0.0457871	0.0142045	0.00913061
1195	2015-06-18 07:00:00	0.0479729	0.0137356	0.0102489
1196	2015-06-18 08:00:00	0.0483724	0.0137356	0.0113673
1197	2015-06-18 09:00:00	0.049091	0.0137356	0.0118433
1198	2015-06-18 10:00:00	0.0486898	0.0137356	0.0117117
1199	2015-06-18 11:00:00	0.0468933	0.0135111	0.0111041
1200	2015-06-18 12:00:00	0.0462166	0.0132867	0.0111041
1201	2015-06-18 13:00:00	0.0443474	0.0132867	0.0111041
1202	2015-06-18 14:00:00	0.0425665	0.0132867	0.0111041
1203	2015-06-18 15:00:00	0.0416735	0.0132867	0.0111041
1204	2015-06-18 16:00:00	0.0406923	0.0132867	0.0111041
1205	2015-06-18 17:00:00	0.0378593	0.0132867	0.0104745
1206	2015-06-18 18:00:00	0.0348495	0.0132867	0.00984486
1207	2015-06-18 19:00:00	0.0347671	0.0119647	0.00969587
1208	2015-06-18 20:00:00	0.0348616	0.0106426	0.00954688
1209	2015-06-18 21:00:00	0.0347191	0.0103689	0.00954688
1210	2015-06-18 22:00:00	0.0350678	0.0100953	0.00939035
1211	2015-06-18 23:00:00	0.0354728	0.0100953	0.00923381
1212	2015-06-19	0.0353867	0.0100953	0.00923381
1213	2015-06-19 01:00:00	0.0359485	0.0100953	0.00951998
1214	2015-06-19 02:00:00	0.0363185	0.0100953	0.00980615
1215	2015-06-19 03:00:00	0.035597	0.0100953	0.00980615
1216	2015-06-19 04:00:00	0.0350673	0.0100953	0.00980615
1217	2015-06-19 05:00:00	0.0359892	0.0100953	0.00995202
1218	2015-06-19 06:00:00	0.03556	0.0100953	0.0101329
1219	2015-06-19 07:00:00	0.0331952	0.0100953	0.00904966
1220	2015-06-19 08:00:00	0.0321814	0.0100953	0.00793134
1221	2015-06-19 09:00:00	0.0306239	0.0105879	0.00745532
1222	2015-06-19 10:00:00	0.0294373	0.0110806	0.0069793
1223	2015-06-19 11:00:00	0.0328439	0.0110806	0.00709283
1224	2015-06-19 12:00:00	0.0358796	0.0110806	0.00720636
1225	2015-06-19 13:00:00	0.0369871	0.0110806	0.00720636
1226	2015-06-19 14:00:00	0.0379163	0.0112046	0.00720636
1227	2015-06-19 15:00:00	0.0396842	0.0113287	0.00720636
1228	2015-06-19 16:00:00	0.0416302	0.0113287	0.00720636
1229	2015-06-19 17:00:00	0.0413707	0.0113287	0.00720636
1230	2015-06-19 18:00:00	0.0410025	0.0113287	0.00720636
1231	2015-06-19 19:00:00	0.0409505	0.0117403	0.00701234
1232	2015-06-19 20:00:00	0.041007	0.0121519	0.00681831
1233	2015-06-19 21:00:00	0.0408303	0.0121519	0.00681831
1234	2015-06-19 22:00:00	0.0410384	0.0121519	0.00668977
1235	2015-06-19 23:00:00	0.0417156	0.0121519	0.00656123
1236	2015-06-20	0.0420079	0.0121519	0.00656123
1237	2015-06-20 01:00:00	0.0421314	0.0121519	0.00627506
1238	2015-06-20 02:00:00	0.0431904	0.0121519	0.0059889
1239	2015-06-20 03:00:00	0.0446378	0.0130422	0.0059889
1240	2015-06-20 04:00:00	0.0451496	0.0139325	0.0059889
1241	2015-06-20 05:00:00	0.0439563	0.014941	0.00601544
1242	2015-06-20 06:00:00	0.0431945	0.0167698	0.00600694
1243	2015-06-20 07:00:00	0.0450264	0.0175902	0.0059719
1244	2015-06-20 08:00:00	0.0464269	0.0175902	0.0059719
1245	2015-06-20 09:00:00	0.0484816	0.0170975	0.0059719
1246	2015-06-20 10:00:00	0.0502731	0.0166048	0.0059719
1247	2015-06-20 11:00:00	0.0482447	0.0166048	0.00585837
1248	2015-06-20 12:00:00	0.0464795	0.0166048	0.00574484
1249	2015-06-20 13:00:00	0.0470076	0.0166048	0.00574484
1250	2015-06-20 14:00:00	0.048117	0.0164808	0.00574484
1251	2015-06-20 15:00:00	0.0465812	0.0166187	0.00588172
1252	2015-06-20 16:00:00	0.0444642	0.0168805	0.00601859
1253	2015-06-20 17:00:00	0.0446424	0.0168805	0.00601859
1254	2015-06-20 18:00:00	0.0460515	0.0168805	0.00601859
1255	2015-06-20 19:00:00	0.0503765	0.0162963	0.00601859
1256	2015-06-20 20:00:00	0.0534706	0.015712	0.00601859
1257	2015-06-20 21:00:00	0.0547904	0.015712	0.00601859
1258	2015-06-20 22:00:00	0.056463	0.015712	0.00601859
1259	2015-06-20 23:00:00	0.0569674	0.015712	0.00601859
1260	2015-06-21	0.057119	0.015712	0.00601859
1261	2015-06-21 01:00:00	0.0574624	0.015712	0.00601859
1262	2015-06-21 02:00:00	0.0579101	0.015712	0.00601859
1263	2015-06-21 03:00:00	0.0583156	0.0148217	0.00601859
1264	2015-06-21 04:00:00	0.0586166	0.0139314	0.00601859
1265	2015-06-21 05:00:00	0.0596925	0.0129229	0.00584618
1266	2015-06-21 06:00:00	0.0615448	0.0110941	0.00567376
1267	2015-06-21 07:00:00	0.0611554	0.0102738	0.00567376
1268	2015-06-21 08:00:00	0.0599896	0.0102738	0.00567376
1269	2015-06-21 09:00:00	0.0594955	0.0102738	0.00567376
1270	2015-06-21 10:00:00	0.0618822	0.0102738	0.00644793
1271	2015-06-21 11:00:00	0.0668601	0.0102738	0.00750557
1272	2015-06-21 12:00:00	0.0689575	0.0102738	0.00778903
1273	2015-06-21 13:00:00	0.0694282	0.0104657	0.00778903
1274	2015-06-21 14:00:00	0.071017	0.0106575	0.00778903
1275	2015-06-21 15:00:00	0.0741585	0.0103956	0.00765215
1276	2015-06-21 16:00:00	0.0761821	0.0101338	0.00751527
1277	2015-06-21 17:00:00	0.076822	0.0101338	0.00751527
1278	2015-06-21 18:00:00	0.0772623	0.0101338	0.00752385
1279	2015-06-21 19:00:00	0.0749005	0.0101338	0.00754549
1280	2015-06-21 20:00:00	0.0727382	0.0101338	0.00755855
1281	2015-06-21 21:00:00	0.0710508	0.0101338	0.00815627
1282	2015-06-21 22:00:00	0.068191	0.0101338	0.00875399
1283	2015-06-21 23:00:00	0.0678825	0.0101338	0.00875399
1284	2015-06-22	0.0687463	0.0101338	0.00875399
1285	2015-06-22 01:00:00	0.0681179	0.0101338	0.00875399
1286	2015-06-22 02:00:00	0.067296	0.0101338	0.00875399
1287	2015-06-22 03:00:00	0.0663302	0.0109697	0.00875399
1288	2015-06-22 04:00:00	0.0655579	0.0118055	0.00875399
1289	2015-06-22 05:00:00	0.0657569	0.0118055	0.00875399
1290	2015-06-22 06:00:00	0.0663659	0.0118055	0.00875399
1291	2015-06-22 07:00:00	0.0674901	0.0118055	0.00875399
1292	2015-06-22 08:00:00	0.0682043	0.0118055	0.00875399
1293	2015-06-22 09:00:00	0.0674152	0.0118055	0.00875399
1294	2015-06-22 10:00:00	0.0638485	0.0118055	0.0081378
1295	2015-06-22 11:00:00	0.0583358	0.0118822	0.00723815
1296	2015-06-22 12:00:00	0.0556007	0.0119589	0.00695469
1297	2015-06-22 13:00:00	0.0537919	0.011767	0.006993
1298	2015-06-22 14:00:00	0.0505525	0.0115751	0.0070313
1299	2015-06-22 15:00:00	0.0472424	0.0115751	0.0070313
1300	2015-06-22 16:00:00	0.045363	0.0115751	0.0070313
1301	2015-06-22 17:00:00	0.0446048	0.0115751	0.00704953
1302	2015-06-22 18:00:00	0.0429369	0.0125545	0.00705918
1303	2015-06-22 19:00:00	0.0423579	0.0135339	0.00703754
1304	2015-06-22 20:00:00	0.0426888	0.0135339	0.00702448
1305	2015-06-22 21:00:00	0.043934	0.0135339	0.00642676
1306	2015-06-22 22:00:00	0.0454768	0.0135339	0.00582904
1307	2015-06-22 23:00:00	0.044634	0.0135339	0.00599855
1308	2015-06-23	0.0434936	0.0135339	0.00616805
1309	2015-06-23 01:00:00	0.0435182	0.0135339	0.00616805
1310	2015-06-23 02:00:00	0.0424303	0.0135339	0.00616805
1311	2015-06-23 03:00:00	0.0413031	0.0127664	0.00616805
1312	2015-06-23 04:00:00	0.0412885	0.011999	0.00616805
1313	2015-06-23 05:00:00	0.0408809	0.011999	0.00652854
1314	2015-06-23 06:00:00	0.0388833	0.011999	0.00688903
1315	2015-06-23 07:00:00	0.0379262	0.011999	0.00688903
1316	2015-06-23 08:00:00	0.0385591	0.011999	0.00688903
1317	2015-06-23 09:00:00	0.0380392	0.011999	0.00688903
1318	2015-06-23 10:00:00	0.0386785	0.011999	0.00683718
1319	2015-06-23 11:00:00	0.0401708	0.0119223	0.00678534
1320	2015-06-23 12:00:00	0.040504	0.0118457	0.00678534
1321	2015-06-23 13:00:00	0.040628	0.0118457	0.00676952
1322	2015-06-23 14:00:00	0.0425565	0.0118457	0.0067537
1323	2015-06-23 15:00:00	0.044678	0.0118457	0.0067537
1324	2015-06-23 16:00:00	0.0449949	0.0118457	0.0067537
1325	2015-06-23 17:00:00	0.0445554	0.0118457	0.00673547
1326	2015-06-23 18:00:00	0.0440036	0.0108663	0.00671724
1327	2015-06-23 19:00:00	0.043315	0.00988692	0.00675561
1328	2015-06-23 20:00:00	0.0427389	0.00988692	0.00679399
1329	2015-06-23 21:00:00	0.0411114	0.00988692	0.00680257
1330	2015-06-23 22:00:00	0.038991	0.00988692	0.00681115
1331	2015-06-23 23:00:00	0.0391066	0.00988692	0.00664164
1332	2015-06-24	0.0397152	0.00988692	0.00647214
1333	2015-06-24 01:00:00	0.0392914	0.00988692	0.00647214
1334	2015-06-24 02:00:00	0.0392542	0.00988692	0.00647214
1335	2015-06-24 03:00:00	0.040368	0.00981846	0.00647214
1336	2015-06-24 04:00:00	0.0410954	0.00975	0.00647214
1337	2015-06-24 05:00:00	0.0410262	0.00975	0.00611165
1338	2015-06-24 06:00:00	0.041514	0.00975	0.00575116
1339	2015-06-24 07:00:00	0.0408309	0.00975	0.00575116
1340	2015-06-24 08:00:00	0.0395907	0.00975	0.00575116
1341	2015-06-24 09:00:00	0.0426095	0.00975	0.00586372
1342	2015-06-24 10:00:00	0.0440659	0.0108904	0.00609164
1343	2015-06-24 11:00:00	0.0433587	0.0120308	0.00620699
1344	2015-06-24 12:00:00	0.0442137	0.0120308	0.00620699
1345	2015-06-24 13:00:00	0.0453685	0.0120308	0.00618451
1346	2015-06-24 14:00:00	0.0469874	0.0120308	0.00616202
1347	2015-06-24 15:00:00	0.0472163	0.0121677	0.00622433
1348	2015-06-24 16:00:00	0.0469811	0.0123046	0.00628663
1349	2015-06-24 17:00:00	0.0480416	0.0123046	0.00628663
1350	2015-06-24 18:00:00	0.053557	0.0123046	0.00628663
1351	2015-06-24 19:00:00	0.0597238	0.0123046	0.00624826
1352	2015-06-24 20:00:00	0.0614358	0.0123046	0.00620988
1353	2015-06-24 21:00:00	0.0623354	0.0123046	0.0062013
1354	2015-06-24 22:00:00	0.0630071	0.0135146	0.00619373
1355	2015-06-24 23:00:00	0.0624239	0.0147246	0.00619474
1356	2015-06-25	0.0620686	0.0147246	0.00619474
1357	2015-06-25 01:00:00	0.0641005	0.0147246	0.00637511
1358	2015-06-25 02:00:00	0.066663	0.0147246	0.00655547
1359	2015-06-25 03:00:00	0.0674437	0.0147246	0.00655547
1360	2015-06-25 04:00:00	0.0676937	0.0147246	0.00655547
1361	2015-06-25 05:00:00	0.0676761	0.0147246	0.00655547
1362	2015-06-25 06:00:00	0.0685919	0.0147246	0.00655547
1363	2015-06-25 07:00:00	0.0703109	0.0147246	0.00655547
1364	2015-06-25 08:00:00	0.0710964	0.0147246	0.00655547
1365	2015-06-25 09:00:00	0.0717433	0.0147246	0.00646064
1366	2015-06-25 10:00:00	0.073845	0.0137023	0.00614432
1367	2015-06-25 11:00:00	0.0751159	0.0126799	0.00592282
1368	2015-06-25 12:00:00	0.0749319	0.0126799	0.00592282
1369	2015-06-25 13:00:00	0.073779	0.0136512	0.00592282
1370	2015-06-25 14:00:00	0.0699248	0.0164556	0.00592282
1371	2015-06-25 15:00:00	0.0676072	0.0184457	0.006119
1372	2015-06-25 16:00:00	0.0679907	0.0186026	0.00631518
1373	2015-06-25 17:00:00	0.069254	0.0186026	0.00631518
1374	2015-06-25 18:00:00	0.0673009	0.0186026	0.00631518
1375	2015-06-25 19:00:00	0.0636257	0.0186026	0.00631518
1376	2015-06-25 20:00:00	0.0631667	0.0186026	0.00631518
1377	2015-06-25 21:00:00	0.0628565	0.0197554	0.00631518
1378	2015-06-25 22:00:00	0.0626799	0.0207996	0.00631418
1379	2015-06-25 23:00:00	0.0623567	0.0233044	0.00631317
1380	2015-06-26	0.0618998	0.0259178	0.00631317
1381	2015-06-26 01:00:00	0.0620164	0.0259178	0.0061328
1382	2015-06-26 02:00:00	0.0625212	0.0259178	0.00595243
1383	2015-06-26 03:00:00	0.0622295	0.0273574	0.00595243
1384	2015-06-26 04:00:00	0.0615497	0.0287969	0.00595243
1385	2015-06-26 05:00:00	0.0656132	0.0287969	0.00595243
1386	2015-06-26 06:00:00	0.0695351	0.029971	0.00595243
1387	2015-06-26 07:00:00	0.0725867	0.031145	0.00595243
1388	2015-06-26 08:00:00	0.0757798	0.031145	0.00595243
1389	2015-06-26 09:00:00	0.0721406	0.0326452	0.00595439
1390	2015-06-26 10:00:00	0.0670892	0.0361809	0.0059895
1391	2015-06-26 11:00:00	0.0685845	0.0382164	0.00604322
1392	2015-06-26 12:00:00	0.0714921	0.0382164	0.0060638
1393	2015-06-26 13:00:00	0.071444	0.0382443	0.0060638
1394	2015-06-26 14:00:00	0.0755041	0.036439	0.0060638
1395	2015-06-26 15:00:00	0.0801608	0.0348973	0.00588837
1396	2015-06-26 16:00:00	0.0807092	0.0351889	0.00571295
1397	2015-06-26 17:00:00	0.0798154	0.0351889	0.00571295
1398	2015-06-26 18:00:00	0.0829755	0.0351889	0.00590023
1399	2015-06-26 19:00:00	0.0897769	0.0351889	0.00608751
1400	2015-06-26 20:00:00	0.0925244	0.0351889	0.00608751
1401	2015-06-26 21:00:00	0.0926509	0.0358495	0.00608751
1402	2015-06-26 22:00:00	0.0932938	0.0374676	0.00618328
1403	2015-06-26 23:00:00	0.0996271	0.0358118	0.00627905
1404	2015-06-27	0.105444	0.0331984	0.00627905
1405	2015-06-27 01:00:00	0.106076	0.0331984	0.00627905
1406	2015-06-27 02:00:00	0.107818	0.0331984	0.00627905
1407	2015-06-27 03:00:00	0.11067	0.0326217	0.00627905
1408	2015-06-27 04:00:00	0.112412	0.0320449	0.00627905
1409	2015-06-27 05:00:00	0.109052	0.0320449	0.00627905
1410	2015-06-27 06:00:00	0.106134	0.0308709	0.00627905
1411	2015-06-27 07:00:00	0.107413	0.0296968	0.00627905
1412	2015-06-27 08:00:00	0.10825	0.0296968	0.00627905
1413	2015-06-27 09:00:00	0.112537	0.0281966	0.00644119
1414	2015-06-27 10:00:00	0.12015	0.0245429	0.00665065
1415	2015-06-27 11:00:00	0.126138	0.0223893	0.00672299
1416	2015-06-27 12:00:00	0.128801	0.0223893	0.00674799
1417	2015-06-27 13:00:00	0.129347	0.0213902	0.00674799
1418	2015-06-27 14:00:00	0.126032	0.0207647	0.00674799
1419	2015-06-27 15:00:00	0.123838	0.0205529	0.00666493
1420	2015-06-27 16:00:00	0.125504	0.0199676	0.00658187
1421	2015-06-27 17:00:00	0.124381	0.0199676	0.00658187
1422	2015-06-27 18:00:00	0.118388	0.0199676	0.00639459
1423	2015-06-27 19:00:00	0.109063	0.020445	0.00620731
1424	2015-06-27 20:00:00	0.104607	0.0209225	0.00620731
1425	2015-06-27 21:00:00	0.103983	0.0198634	0.00624166
1426	2015-06-27 22:00:00	0.102635	0.0170501	0.00624729
1427	2015-06-27 23:00:00	0.0994322	0.0152959	0.00621857
1428	2015-06-28	0.0969528	0.0152959	0.00621857
1429	2015-06-28 01:00:00	0.0944541	0.0152959	0.00621857
1430	2015-06-28 02:00:00	0.0902398	0.0152959	0.00621857
1431	2015-06-28 03:00:00	0.0888426	0.0144331	0.00621857
1432	2015-06-28 04:00:00	0.0891609	0.0135703	0.00621857
1433	2015-06-28 05:00:00	0.0887572	0.0135703	0.00621857
1434	2015-06-28 06:00:00	0.0867783	0.0135703	0.00621857
1435	2015-06-28 07:00:00	0.0804663	0.0137038	0.00621857
1436	2015-06-28 08:00:00	0.0757294	0.0138373	0.00621857
1437	2015-06-28 09:00:00	0.072886	0.0138373	0.00609617
1438	2015-06-28 10:00:00	0.0672526	0.0138373	0.00589329
1439	2015-06-28 11:00:00	0.0579646	0.0138373	0.00576723
1440	2015-06-28 12:00:00	0.0514665	0.0138373	0.00572165
1441	2015-06-28 13:00:00	0.0507251	0.01403	0.00572165
1442	2015-06-28 14:00:00	0.0502216	0.0138492	0.00572165
1443	2015-06-28 15:00:00	0.0481952	0.0146625	0.00572165
1444	2015-06-28 16:00:00	0.045931	0.0158495	0.00572165
1445	2015-06-28 17:00:00	0.0455594	0.0158495	0.00572165
1446	2015-06-28 18:00:00	0.0447878	0.0158495	0.00596747
1447	2015-06-28 19:00:00	0.0478904	0.0153721	0.0062133
1448	2015-06-28 20:00:00	0.0513931	0.0148947	0.0062133
1449	2015-06-28 21:00:00	0.052495	0.0141403	0.00617895
1450	2015-06-28 22:00:00	0.0537815	0.0130812	0.00607754
1451	2015-06-28 23:00:00	0.0523933	0.0127765	0.00603032
1452	2015-06-29	0.0508204	0.0127765	0.00605014
1453	2015-06-29 01:00:00	0.0509161	0.0127765	0.00605014
1454	2015-06-29 02:00:00	0.050161	0.0138281	0.00605014
1455	2015-06-29 03:00:00	0.0477926	0.0148798	0.00605014
1456	2015-06-29 04:00:00	0.0462749	0.0148798	0.00605014
1457	2015-06-29 05:00:00	0.0456281	0.0148798	0.00605014
1458	2015-06-29 06:00:00	0.0470006	0.0148798	0.00605014
1459	2015-06-29 07:00:00	0.0488854	0.0147463	0.00616535
1460	2015-06-29 08:00:00	0.0487509	0.0146128	0.00628056
1461	2015-06-29 09:00:00	0.0474511	0.0146128	0.00622114
1462	2015-06-29 10:00:00	0.0455645	0.0146511	0.00616686
1463	2015-06-29 11:00:00	0.0450611	0.0146895	0.00617201
1464	2015-06-29 12:00:00	0.0451445	0.0146895	0.00617201
1465	2015-06-29 13:00:00	0.0458286	0.0144967	0.00647033
1466	2015-06-29 14:00:00	0.0464221	0.014304	0.00676866
1467	2015-06-29 15:00:00	0.0496174	0.013117	0.00676866
1468	2015-06-29 16:00:00	0.0529033	0.01193	0.00676866
1469	2015-06-29 17:00:00	0.058676	0.01193	0.00676866
1470	2015-06-29 18:00:00	0.0699166	0.01193	0.00654467
1471	2015-06-29 19:00:00	0.0744858	0.01193	0.00632069
1472	2015-06-29 20:00:00	0.0735872	0.01193	0.00632069
1473	2015-06-29 21:00:00	0.0742144	0.01193	0.00632069
1474	2015-06-29 22:00:00	0.0761742	0.0125025	0.00632069
1475	2015-06-29 23:00:00	0.0803128	0.013075	0.00630086
1476	2015-06-30	0.0831188	0.013075	0.00628104
1477	2015-06-30 01:00:00	0.0836746	0.013075	0.00628104
1478	2015-06-30 02:00:00	0.0852189	0.0120233	0.00628104
1479	2015-06-30 03:00:00	0.0860899	0.0118109	0.00628104
1480	2015-06-30 04:00:00	0.0859726	0.01265	0.00628104
1481	2015-06-30 05:00:00	0.0867986	0.0128405	0.00628104
1482	2015-06-30 06:00:00	0.0862805	0.0131468	0.00628104
1483	2015-06-30 07:00:00	0.0904505	0.0132625	0.00616583
1484	2015-06-30 08:00:00	0.0959648	0.0132625	0.00605062
1485	2015-06-30 09:00:00	0.0990301	0.0132625	0.00607272
1486	2015-06-30 10:00:00	0.10211	0.0143964	0.00608969
1487	2015-06-30 11:00:00	0.103392	0.0155304	0.00608454
1488	2015-06-30 12:00:00	0.10466	0.0155304	0.00608454
1489	2015-06-30 13:00:00	0.104461	0.0157569	0.00578622
1490	2015-06-30 14:00:00	0.104089	0.0160162	0.00548789
1491	2015-06-30 15:00:00	0.101129	0.016049	0.00548789
1492	2015-06-30 16:00:00	0.0983428	0.016049	0.00548789
1493	2015-06-30 17:00:00	0.0930477	0.016049	0.00548789
1494	2015-06-30 18:00:00	0.0819961	0.016049	0.00546605
1495	2015-06-30 19:00:00	0.0766369	0.016049	0.00553012
1496	2015-06-30 20:00:00	0.0770342	0.016049	0.00561603
1497	2015-06-30 21:00:00	0.0754774	0.016049	0.00561603
1498	2015-06-30 22:00:00	0.0739455	0.0154765	0.00563714
1499	2015-06-30 23:00:00	0.0723132	0.014904	0.00565824
1500	2015-07-01	0.0706559	0.014904	0.00565824
1501	2015-07-01 01:00:00	0.0700044	0.014904	0.00565824
1502	2015-07-01 02:00:00	0.0692048	0.014904	0.00565846
1503	2015-07-01 03:00:00	0.06829	0.0149043	0.00565869
1504	2015-07-01 04:00:00	0.0675232	0.0149046	0.00565869
1505	2015-07-01 05:00:00	0.0671185	0.0147141	0.00565869
1506	2015-07-01 06:00:00	0.0664849	0.0144079	0.00565869
1507	2015-07-01 07:00:00	0.0628207	0.0142922	0.00565869
1508	2015-07-01 08:00:00	0.0593853	0.0142922	0.00565869
1509	2015-07-01 09:00:00	0.0563145	0.0142922	0.0058074
1510	2015-07-01 10:00:00	0.0532614	0.0133779	0.00595612
1511	2015-07-01 11:00:00	0.0517533	0.0124637	0.00595612
1512	2015-07-01 12:00:00	0.0502277	0.0124637	0.00595612
1513	2015-07-01 13:00:00	0.0500004	0.0122372	0.00599465
1514	2015-07-01 14:00:00	0.0501132	0.0119779	0.00603318
1515	2015-07-01 15:00:00	0.0497633	0.011945	0.00603318
1516	2015-07-01 16:00:00	0.0490732	0.011945	0.00603318
1517	2015-07-01 17:00:00	0.0500627	0.011945	0.00603318
1518	2015-07-01 18:00:00	0.0512968	0.0120413	0.00613559
1519	2015-07-01 19:00:00	0.0486856	0.0121375	0.00615209
1520	2015-07-01 20:00:00	0.0458298	0.0121375	0.00606618
1521	2015-07-01 21:00:00	0.0462218	0.0121375	0.00606618
1522	2015-07-01 22:00:00	0.0456598	0.0121375	0.00604508
1523	2015-07-01 23:00:00	0.0419682	0.0121375	0.00621825
1524	2015-07-02	0.0392308	0.0121375	0.00641252
1525	2015-07-02 01:00:00	0.0404291	0.0121375	0.00641252
1526	2015-07-02 02:00:00	0.0416547	0.0121375	0.0064123
1527	2015-07-02 03:00:00	0.0429228	0.011298	0.00641207
1528	2015-07-02 04:00:00	0.0441638	0.0104586	0.00641207
1529	2015-07-02 05:00:00	0.0440657	0.0104586	0.00641207
1530	2015-07-02 06:00:00	0.0436894	0.0104586	0.00641207
1531	2015-07-02 07:00:00	0.0415965	0.0104586	0.00641207
1532	2015-07-02 08:00:00	0.0397819	0.0104586	0.00641207
1533	2015-07-02 09:00:00	0.0397758	0.0104586	0.00624125
1534	2015-07-02 10:00:00	0.0400927	0.0102005	0.00622237
1535	2015-07-02 11:00:00	0.0398836	0.00994243	0.00728946
1536	2015-07-02 12:00:00	0.0393516	0.00994243	0.00820462
1537	2015-07-02 13:00:00	0.0403695	0.00994243	0.00869268
1538	2015-07-02 14:00:00	0.041297	0.00994243	0.00918075
1539	2015-07-02 15:00:00	0.0407829	0.00994243	0.00918075
1540	2015-07-02 16:00:00	0.0403592	0.00994243	0.00918075
1541	2015-07-02 17:00:00	0.0390243	0.00994243	0.00918075
1542	2015-07-02 18:00:00	0.0377103	0.00984621	0.00907833
1543	2015-07-02 19:00:00	0.0375242	0.00975	0.00897592
1544	2015-07-02 20:00:00	0.0373172	0.00975	0.00897592
1545	2015-07-02 21:00:00	0.0391232	0.00975	0.00901312
1546	2015-07-02 22:00:00	0.040958	0.00975	0.00960854
1547	2015-07-02 23:00:00	0.0409662	0.00975	0.0104467
1548	2015-07-03	0.0409455	0.00975	0.0107267
1549	2015-07-03 01:00:00	0.0398027	0.00975	0.0107267
1550	2015-07-03 02:00:00	0.0386436	0.00975	0.0107267
1551	2015-07-03 03:00:00	0.0373189	0.0102399	0.0107267
1552	2015-07-03 04:00:00	0.0360104	0.0107298	0.0107267
1553	2015-07-03 05:00:00	0.035704	0.0116363	0.0107267
1554	2015-07-03 06:00:00	0.0370237	0.0125428	0.01139
1555	2015-07-03 07:00:00	0.0394058	0.0125428	0.0120533
1556	2015-07-03 08:00:00	0.0401617	0.0125428	0.0120533
1557	2015-07-03 09:00:00	0.0422692	0.0125428	0.0120533
1558	2015-07-03 10:00:00	0.0442445	0.013293	0.0119014
1559	2015-07-03 11:00:00	0.045273	0.0140432	0.0108343
1560	2015-07-03 12:00:00	0.0464337	0.0140432	0.00991913
1561	2015-07-03 13:00:00	0.0479304	0.0140432	0.00945925
1562	2015-07-03 14:00:00	0.0494299	0.0140432	0.00899937
1563	2015-07-03 15:00:00	0.0498181	0.0140432	0.00899937
1564	2015-07-03 16:00:00	0.0502036	0.0140432	0.00899937
1565	2015-07-03 17:00:00	0.0536719	0.0140432	0.0090028
1566	2015-07-03 18:00:00	0.0569325	0.0140432	0.00900623
1567	2015-07-03 19:00:00	0.0573201	0.0140432	0.00900623
1568	2015-07-03 20:00:00	0.0579154	0.0140432	0.00900623
1569	2015-07-03 21:00:00	0.0570036	0.0140432	0.00896903
1570	2015-07-03 22:00:00	0.0565303	0.0140432	0.00865284
1571	2015-07-03 23:00:00	0.0571962	0.0140432	0.00789962
1572	2015-07-04	0.0574236	0.0140432	0.00742539
1573	2015-07-04 01:00:00	0.057222	0.0140432	0.00742539
1574	2015-07-04 02:00:00	0.0563535	0.0140432	0.00742539
1575	2015-07-04 03:00:00	0.0557443	0.0136258	0.00777172
1576	2015-07-04 04:00:00	0.0558021	0.0132084	0.00811806
1577	2015-07-04 05:00:00	0.0556172	0.0123019	0.00811806
1578	2015-07-04 06:00:00	0.0534989	0.0113954	0.00745474
1579	2015-07-04 07:00:00	0.0507285	0.0113954	0.00679142
1580	2015-07-04 08:00:00	0.0498916	0.0113954	0.00679142
1581	2015-07-04 09:00:00	0.0482151	0.0113954	0.00703702
1582	2015-07-04 10:00:00	0.0480723	0.0106452	0.00807127
1583	2015-07-04 11:00:00	0.0491678	0.00989503	0.00885992
1584	2015-07-04 12:00:00	0.0487295	0.00989503	0.00885992
1585	2015-07-04 13:00:00	0.0464613	0.00989503	0.00879321
1586	2015-07-04 14:00:00	0.0441925	0.00989503	0.00872649
1587	2015-07-04 15:00:00	0.0439233	0.00989503	0.00931438
1588	2015-07-04 16:00:00	0.0436546	0.00989503	0.00990227
1589	2015-07-04 17:00:00	0.0422036	0.00989503	0.010769
1590	2015-07-04 18:00:00	0.0406629	0.0103111	0.011798
1591	2015-07-04 19:00:00	0.0403541	0.0107272	0.0119603
1592	2015-07-04 20:00:00	0.0401351	0.0107272	0.0119603
1593	2015-07-04 21:00:00	0.0407142	0.0107272	0.0119603
1594	2015-07-04 22:00:00	0.0412467	0.0107272	0.0116811
1595	2015-07-04 23:00:00	0.0419094	0.0107272	0.0114018
1596	2015-07-05	0.0426186	0.0107272	0.0114018
1597	2015-07-05 01:00:00	0.0428695	0.010911	0.0114018
1598	2015-07-05 02:00:00	0.0441529	0.0110947	0.0114018
1599	2015-07-05 03:00:00	0.0474346	0.0110222	0.0110555
1600	2015-07-05 04:00:00	0.0496837	0.0109497	0.0107092
1601	2015-07-05 05:00:00	0.0511038	0.0109497	0.0107092
1602	2015-07-05 06:00:00	0.0534342	0.0109497	0.0107092
1603	2015-07-05 07:00:00	0.0549163	0.0109497	0.0107092
1604	2015-07-05 08:00:00	0.0554882	0.0109497	0.0107092
1605	2015-07-05 09:00:00	0.056151	0.0109497	0.0104636
1606	2015-07-05 10:00:00	0.0556196	0.0109497	0.00967686
1607	2015-07-05 11:00:00	0.0552434	0.0109497	0.00913575
1608	2015-07-05 12:00:00	0.0560616	0.0109497	0.00913575
1609	2015-07-05 13:00:00	0.0569745	0.0109497	0.00913575
1610	2015-07-05 14:00:00	0.0576966	0.0109497	0.00913575
1611	2015-07-05 15:00:00	0.0572465	0.0109497	0.0088705
1612	2015-07-05 16:00:00	0.0569872	0.0109497	0.00860524
1613	2015-07-05 17:00:00	0.0554205	0.0109497	0.00773506
1614	2015-07-05 18:00:00	0.054915	0.0105336	0.00670261
1615	2015-07-05 19:00:00	0.0558778	0.0101175	0.00654036
1616	2015-07-05 20:00:00	0.0557794	0.0101175	0.00654036
1617	2015-07-05 21:00:00	0.0548533	0.0101175	0.00654036
1618	2015-07-05 22:00:00	0.0543622	0.0101175	0.00654036
1619	2015-07-05 23:00:00	0.0540589	0.0101175	0.00654036
1620	2015-07-06	0.0533206	0.0101175	0.00654036
1621	2015-07-06 01:00:00	0.0540871	0.00993375	0.00654036
1622	2015-07-06 02:00:00	0.0549015	0.00975	0.00654036
1623	2015-07-06 03:00:00	0.0545126	0.00975	0.00654036
1624	2015-07-06 04:00:00	0.0540759	0.00975	0.00654036
1625	2015-07-06 05:00:00	0.0541241	0.00975	0.00654036
1626	2015-07-06 06:00:00	0.0547591	0.00975	0.00654036
1627	2015-07-06 07:00:00	0.0562492	0.00975	0.00654036
1628	2015-07-06 08:00:00	0.0571526	0.00975	0.00654036
1629	2015-07-06 09:00:00	0.0576101	0.00975	0.00660326
1630	2015-07-06 10:00:00	0.0589553	0.0103697	0.00641861
1631	2015-07-06 11:00:00	0.0611095	0.0109893	0.00636001
1632	2015-07-06 12:00:00	0.062376	0.0109893	0.00654896
1633	2015-07-06 13:00:00	0.062253	0.0113756	0.00750036
1634	2015-07-06 14:00:00	0.0638791	0.0117619	0.00845177
1635	2015-07-06 15:00:00	0.0675239	0.0117619	0.00812913
1636	2015-07-06 16:00:00	0.0694194	0.0117619	0.00780649
1637	2015-07-06 17:00:00	0.0697395	0.0117619	0.00780649
1638	2015-07-06 18:00:00	0.0725898	0.0117619	0.00834768
1639	2015-07-06 19:00:00	0.0750974	0.0128485	0.00923062
1640	2015-07-06 20:00:00	0.0750748	0.013935	0.00957235
1641	2015-07-06 21:00:00	0.0748978	0.013935	0.00957235
1642	2015-07-06 22:00:00	0.0738541	0.013935	0.00957235
1643	2015-07-06 23:00:00	0.0732692	0.013935	0.00957235
1644	2015-07-07	0.073551	0.013935	0.00957235
1645	2015-07-07 01:00:00	0.072485	0.013935	0.00957235
1646	2015-07-07 02:00:00	0.0708553	0.013935	0.00957235
1647	2015-07-07 03:00:00	0.0687606	0.013935	0.00957235
1648	2015-07-07 04:00:00	0.0672297	0.013935	0.00957235
1649	2015-07-07 05:00:00	0.0652343	0.014045	0.00957235
1650	2015-07-07 06:00:00	0.0617895	0.0141549	0.00979678
1651	2015-07-07 07:00:00	0.0587245	0.0141549	0.0101906
1652	2015-07-07 08:00:00	0.0571087	0.0141549	0.0103599
1653	2015-07-07 09:00:00	0.0553915	0.0141549	0.010297
1654	2015-07-07 10:00:00	0.052248	0.0135353	0.0102341
1655	2015-07-07 11:00:00	0.0491254	0.0129156	0.0100987
1656	2015-07-07 12:00:00	0.047429	0.0129156	0.00996331
1657	2015-07-07 13:00:00	0.0463262	0.0125293	0.00901191
1658	2015-07-07 14:00:00	0.0426741	0.012143	0.00806051
1659	2015-07-07 15:00:00	0.0381299	0.012143	0.00806051
1660	2015-07-07 16:00:00	0.036135	0.012143	0.00806051
1661	2015-07-07 17:00:00	0.0380818	0.012143	0.00891742
1662	2015-07-07 18:00:00	0.0362068	0.012143	0.00942701
1663	2015-07-07 19:00:00	0.0318113	0.0110565	0.00873794
1664	2015-07-07 20:00:00	0.0312374	0.00996997	0.00839621
1665	2015-07-07 21:00:00	0.030795	0.00996997	0.00839621
1666	2015-07-07 22:00:00	0.0302897	0.00996997	0.00839621
1667	2015-07-07 23:00:00	0.0299505	0.00996997	0.00839621
1668	2015-07-08	0.0296743	0.00996997	0.00839621
1669	2015-07-08 01:00:00	0.0300413	0.00996997	0.00839621
1670	2015-07-08 02:00:00	0.0307709	0.00996997	0.00839621
1671	2015-07-08 03:00:00	0.0319918	0.00996997	0.00960051
1672	2015-07-08 04:00:00	0.03285	0.00996997	0.0108048
1673	2015-07-08 05:00:00	0.0354431	0.00985998	0.011494
1674	2015-07-08 06:00:00	0.0375393	0.0107543	0.0120239
1675	2015-07-08 07:00:00	0.0375787	0.0120021	0.0116953
1676	2015-07-08 08:00:00	0.0381149	0.0122456	0.011526
1677	2015-07-08 09:00:00	0.0391484	0.0122456	0.011526
1678	2015-07-08 10:00:00	0.0408074	0.0122456	0.011526
1679	2015-07-08 11:00:00	0.0407649	0.0122456	0.0114724
1680	2015-07-08 12:00:00	0.0400969	0.0122456	0.0114189
1681	2015-07-08 13:00:00	0.0409832	0.0128584	0.0114189
1682	2015-07-08 14:00:00	0.042746	0.0146771	0.0114189
1683	2015-07-08 15:00:00	0.0436598	0.0164218	0.0115791
1684	2015-07-08 16:00:00	0.0436969	0.0169605	0.0117393
1685	2015-07-08 17:00:00	0.0416266	0.017307	0.0108824
1686	2015-07-08 18:00:00	0.0458515	0.0176534	0.0103811
1687	2015-07-08 19:00:00	0.0527954	0.0176534	0.0107369
1688	2015-07-08 20:00:00	0.0534442	0.0176534	0.0107369
1689	2015-07-08 21:00:00	0.0535341	0.0190071	0.0107369
1690	2015-07-08 22:00:00	0.0537431	0.0203608	0.0110103
1691	2015-07-08 23:00:00	0.0538989	0.0203608	0.0112838
1692	2015-07-09	0.0539356	0.0203608	0.0112838
1693	2015-07-09 01:00:00	0.0544131	0.0203608	0.0112838
1694	2015-07-09 02:00:00	0.0548228	0.0203608	0.0112838
1695	2015-07-09 03:00:00	0.0548404	0.0203608	0.0100795
1696	2015-07-09 04:00:00	0.0549259	0.0203608	0.00887521
1697	2015-07-09 05:00:00	0.0539918	0.0203608	0.00818601
1698	2015-07-09 06:00:00	0.0538156	0.0201791	0.00743166
1699	2015-07-09 07:00:00	0.05555	0.019754	0.00736651
1700	2015-07-09 08:00:00	0.0565265	0.0195105	0.00736651
1701	2015-07-09 09:00:00	0.0560572	0.0225462	0.00736651
1702	2015-07-09 10:00:00	0.058053	0.0255818	0.00736651
1703	2015-07-09 11:00:00	0.0639984	0.0255818	0.00736651
1704	2015-07-09 12:00:00	0.0674788	0.0255818	0.00736651
1705	2015-07-09 13:00:00	0.0765841	0.024969	0.00736651
1706	2015-07-09 14:00:00	0.0886102	0.0261153	0.00736651
1707	2015-07-09 15:00:00	0.0943251	0.0294449	0.00776866
1708	2015-07-09 16:00:00	0.0971193	0.0310154	0.00817082
1709	2015-07-09 17:00:00	0.100488	0.0320744	0.00851362
1710	2015-07-09 18:00:00	0.105646	0.0331334	0.00830684
1711	2015-07-09 19:00:00	0.116205	0.0331334	0.00775726
1712	2015-07-09 20:00:00	0.124976	0.0331334	0.00775726
1713	2015-07-09 21:00:00	0.13456	0.0317797	0.00775726
1714	2015-07-09 22:00:00	0.146759	0.0315088	0.00780602
1715	2015-07-09 23:00:00	0.150941	0.0341739	0.00785477
1716	2015-07-10	0.152506	0.0357562	0.00785477
1717	2015-07-10 01:00:00	0.153816	0.037242	0.00803745
1718	2015-07-10 02:00:00	0.159531	0.0387279	0.00822013
1719	2015-07-10 03:00:00	0.166404	0.0396602	0.00822013
1720	2015-07-10 04:00:00	0.168874	0.0405925	0.00822013
1721	2015-07-10 05:00:00	0.172204	0.0405925	0.00822013
1722	2015-07-10 06:00:00	0.175538	0.0444935	0.00822013
1723	2015-07-10 07:00:00	0.183128	0.0483945	0.00822013
1724	2015-07-10 08:00:00	0.190714	0.0483945	0.00822013
1725	2015-07-10 09:00:00	0.194512	0.0478147	0.00822013
1726	2015-07-10 10:00:00	0.201054	0.0474346	0.00822013
1727	2015-07-10 11:00:00	0.206012	0.0503713	0.00845874
1728	2015-07-10 12:00:00	0.208225	0.0531083	0.00869735
1729	2015-07-10 13:00:00	0.208077	0.0550108	0.00869735
1730	2015-07-10 14:00:00	0.211423	0.0616977	0.00869735
1731	2015-07-10 15:00:00	0.223967	0.064373	0.008135
1732	2015-07-10 16:00:00	0.233018	0.0622638	0.00757265
1733	2015-07-10 17:00:00	0.243144	0.0608584	0.00722985
1734	2015-07-10 18:00:00	0.246869	0.0650031	0.00688705
1735	2015-07-10 19:00:00	0.237446	0.0723268	0.00688705
1736	2015-07-10 20:00:00	0.234424	0.0741004	0.00688705
1737	2015-07-10 21:00:00	0.228812	0.0753473	0.00718785
1738	2015-07-10 22:00:00	0.22937	0.0755114	0.00716642
1739	2015-07-10 23:00:00	0.243424	0.0728463	0.00684418
1740	2015-07-11	0.251308	0.071264	0.00684418
1741	2015-07-11 01:00:00	0.257295	0.0697782	0.0066615
1742	2015-07-11 02:00:00	0.268128	0.0682923	0.00658761
1743	2015-07-11 03:00:00	0.270209	0.0713673	0.0066964
1744	2015-07-11 04:00:00	0.267444	0.0744422	0.0066964
1745	2015-07-11 05:00:00	0.26487	0.0761842	0.00688878
1746	2015-07-11 06:00:00	0.26338	0.0762749	0.00708115
1747	2015-07-11 07:00:00	0.259073	0.0746236	0.00708115
1748	2015-07-11 08:00:00	0.253681	0.0746236	0.00708115
1749	2015-07-11 09:00:00	0.26251	0.0721677	0.00708115
1750	2015-07-11 10:00:00	0.279074	0.0695121	0.00708115
1751	2015-07-11 11:00:00	0.283024	0.0721676	0.00701147
1752	2015-07-11 12:00:00	0.27924	0.0750226	0.00694179
1753	2015-07-11 13:00:00	0.273045	0.0770964	0.00697182
1754	2015-07-11 14:00:00	0.26319	0.0765519	0.00700186
1755	2015-07-11 15:00:00	0.258921	0.0739336	0.00700186
1756	2015-07-11 16:00:00	0.258312	0.0739336	0.00700186
1757	2015-07-11 17:00:00	0.25287	0.0739336	0.00700186
1758	2015-07-11 18:00:00	0.25912	0.0683834	0.00700186
1759	2015-07-11 19:00:00	0.269877	0.0641339	0.00700186
1760	2015-07-11 20:00:00	0.268941	0.0654346	0.00700186
1761	2015-07-11 21:00:00	0.269195	0.0693467	0.00670106
1762	2015-07-11 22:00:00	0.265103	0.0785799	0.00640026
1763	2015-07-11 23:00:00	0.255623	0.0872083	0.00640026
1764	2015-07-12	0.250489	0.0905154	0.00640026
1765	2015-07-12 01:00:00	0.253344	0.0905154	0.00640026
1766	2015-07-12 02:00:00	0.24866	0.0956797	0.00629147
1767	2015-07-12 03:00:00	0.243407	0.101611	0.00618268
1768	2015-07-12 04:00:00	0.245693	0.102378	0.00618268
1769	2015-07-12 05:00:00	0.24759	0.105979	0.00599031
1770	2015-07-12 06:00:00	0.252034	0.110874	0.00579794
1771	2015-07-12 07:00:00	0.25358	0.117196	0.00579794
1772	2015-07-12 08:00:00	0.252579	0.122224	0.00579794
1773	2015-07-12 09:00:00	0.244272	0.12356	0.00579794
1774	2015-07-12 10:00:00	0.232993	0.124895	0.00579794
1775	2015-07-12 11:00:00	0.232322	0.124541	0.005629
1776	2015-07-12 12:00:00	0.234624	0.124188	0.00546007
1777	2015-07-12 13:00:00	0.237874	0.12184	0.00543004
1778	2015-07-12 14:00:00	0.244527	0.115398	0.00616866
1779	2015-07-12 15:00:00	0.247625	0.111305	0.00693732
1780	2015-07-12 16:00:00	0.247319	0.111305	0.00693732
1781	2015-07-12 17:00:00	0.242571	0.11761	0.00693732
1782	2015-07-12 18:00:00	0.233579	0.126838	0.00693732
1783	2015-07-12 19:00:00	0.228682	0.134337	0.00722899
1784	2015-07-12 20:00:00	0.22803	0.138912	0.00752066
1785	2015-07-12 21:00:00	0.233887	0.133753	0.00752066
1786	2015-07-12 22:00:00	0.248183	0.123273	0.00752066
1787	2015-07-12 23:00:00	0.259325	0.114645	0.00752066
1788	2015-07-13	0.262028	0.111338	0.00752066
1789	2015-07-13 01:00:00	0.255216	0.112838	0.00775257
1790	2015-07-13 02:00:00	0.249767	0.11097	0.00798449
1791	2015-07-13 03:00:00	0.250686	0.1054	0.00798449
1792	2015-07-13 04:00:00	0.250241	0.1032	0.00798449
1793	2015-07-13 05:00:00	0.247074	0.101142	0.00798449
1794	2015-07-13 06:00:00	0.249666	0.0947191	0.00798449
1795	2015-07-13 07:00:00	0.260448	0.085325	0.00798449
1796	2015-07-13 08:00:00	0.265471	0.0802968	0.00798449
1797	2015-07-13 09:00:00	0.265658	0.0789615	0.00798449
1798	2015-07-13 10:00:00	0.258019	0.0793566	0.00840909
1799	2015-07-13 11:00:00	0.24952	0.0775149	0.00931548
1800	2015-07-13 12:00:00	0.248847	0.0739426	0.00979727
1801	2015-07-13 13:00:00	0.244879	0.0780071	0.00979727
1802	2015-07-13 14:00:00	0.244553	0.0810337	0.00902861
1803	2015-07-13 15:00:00	0.250576	0.0799958	0.00825994
1804	2015-07-13 16:00:00	0.252958	0.0799958	0.00825994
1805	2015-07-13 17:00:00	0.257296	0.0736906	0.00825994
1806	2015-07-13 18:00:00	0.256498	0.0693266	0.00833083
1807	2015-07-13 19:00:00	0.250851	0.0682382	0.00825797
1808	2015-07-13 20:00:00	0.25034	0.0652086	0.00811423
1809	2015-07-13 21:00:00	0.241513	0.0700665	0.00811423
1810	2015-07-13 22:00:00	0.226527	0.0749243	0.00811423
1811	2015-07-13 23:00:00	0.220556	0.0749243	0.00811423
1812	2015-07-14	0.220744	0.0749243	0.00811423
1813	2015-07-14 01:00:00	0.222399	0.0734238	0.00788231
1814	2015-07-14 02:00:00	0.220592	0.0729074	0.00765039
1815	2015-07-14 03:00:00	0.217706	0.0713181	0.00765039
1816	2015-07-14 04:00:00	0.218284	0.0687448	0.00765039
1817	2015-07-14 05:00:00	0.218618	0.0680672	0.00823362
1818	2015-07-14 06:00:00	0.209849	0.0695866	0.00881685
1819	2015-07-14 07:00:00	0.194837	0.0750071	0.0090752
1820	2015-07-14 08:00:00	0.188927	0.0782306	0.00933354
1821	2015-07-14 09:00:00	0.186463	0.079259	0.00933354
1822	2015-07-14 10:00:00	0.187025	0.0785569	0.00890894
1823	2015-07-14 11:00:00	0.19005	0.0761024	0.00800255
1824	2015-07-14 12:00:00	0.190048	0.0753783	0.00752077
1825	2015-07-14 13:00:00	0.191811	0.0716078	0.00752077
1826	2015-07-14 14:00:00	0.185366	0.0717012	0.00775355
1827	2015-07-14 15:00:00	0.17497	0.0755651	0.00798634
1828	2015-07-14 16:00:00	0.17278	0.0755651	0.00798634
1829	2015-07-14 17:00:00	0.175209	0.0755651	0.00798634
1830	2015-07-14 18:00:00	0.185885	0.0707007	0.00791545
1831	2015-07-14 19:00:00	0.196368	0.0612163	0.00769665
1832	2015-07-14 20:00:00	0.198604	0.0565962	0.00754872
1833	2015-07-14 21:00:00	0.204606	0.0517384	0.00754872
1834	2015-07-14 22:00:00	0.208464	0.0468806	0.00754872
1835	2015-07-14 23:00:00	0.200349	0.0487967	0.00754872
1836	2015-07-15	0.194378	0.0507129	0.00754872
1837	2015-07-15 01:00:00	0.190364	0.0507129	0.00827638
1838	2015-07-15 02:00:00	0.187754	0.048273	0.00933889
1839	2015-07-15 03:00:00	0.188469	0.0458332	0.00967373
1840	2015-07-15 04:00:00	0.187781	0.0458332	0.00967373
1841	2015-07-15 05:00:00	0.18769	0.0432248	0.0090905
1842	2015-07-15 06:00:00	0.187439	0.0398759	0.00850727
1843	2015-07-15 07:00:00	0.186918	0.035912	0.00824893
1844	2015-07-15 08:00:00	0.186559	0.0326885	0.00799058
1845	2015-07-15 09:00:00	0.185435	0.0316601	0.00814436
1846	2015-07-15 10:00:00	0.182121	0.0306317	0.00829814
1847	2015-07-15 11:00:00	0.17708	0.0296896	0.00829814
1848	2015-07-15 12:00:00	0.174229	0.0287475	0.00829814
1849	2015-07-15 13:00:00	0.16982	0.0268253	0.00829814
1850	2015-07-15 14:00:00	0.16352	0.0210852	0.00816966
1851	2015-07-15 15:00:00	0.151723	0.0172673	0.00804117
1852	2015-07-15 16:00:00	0.141816	0.0172673	0.00804117
1853	2015-07-15 17:00:00	0.13042	0.0176553	0.00804117
1854	2015-07-15 18:00:00	0.107201	0.0180432	0.00804117
1855	2015-07-15 19:00:00	0.0910377	0.0180432	0.00889644
1856	2015-07-15 20:00:00	0.0866971	0.0180432	0.00975172
1857	2015-07-15 21:00:00	0.0787507	0.0180432	0.00975172
1858	2015-07-15 22:00:00	0.0668108	0.0180432	0.00980519
1859	2015-07-15 23:00:00	0.0610473	0.0161271	0.00985865
1860	2015-07-16	0.0592772	0.014211	0.00985865
1861	2015-07-16 01:00:00	0.0571337	0.0144709	0.00913099
1862	2015-07-16 02:00:00	0.0529345	0.0143909	0.00806849
1863	2015-07-16 03:00:00	0.0494814	0.014051	0.00773364
1864	2015-07-16 04:00:00	0.0480841	0.014051	0.00773364
1865	2015-07-16 05:00:00	0.0471526	0.014051	0.00778359
1866	2015-07-16 06:00:00	0.0454401	0.0125944	0.00783354
1867	2015-07-16 07:00:00	0.0455563	0.0111379	0.00839614
1868	2015-07-16 08:00:00	0.0464535	0.0111379	0.00895873
1869	2015-07-16 09:00:00	0.0448708	0.0111379	0.00882196
1870	2015-07-16 10:00:00	0.039826	0.0111379	0.00868519
1871	2015-07-16 11:00:00	0.0353071	0.0111379	0.00868519
1872	2015-07-16 12:00:00	0.0342503	0.0111379	0.00868519
1873	2015-07-16 13:00:00	0.0344236	0.0111379	0.00868519
1874	2015-07-16 14:00:00	0.0347443	0.0110918	0.00858089
1875	2015-07-16 15:00:00	0.0343673	0.0110458	0.00847659
1876	2015-07-16 16:00:00	0.033843	0.0110458	0.00847659
1877	2015-07-16 17:00:00	0.0352241	0.0106579	0.00847659
1878	2015-07-16 18:00:00	0.0376643	0.0102699	0.00847659
1879	2015-07-16 19:00:00	0.0371957	0.0102699	0.00762131
1880	2015-07-16 20:00:00	0.0356682	0.0102699	0.00676603
1881	2015-07-16 21:00:00	0.0360809	0.0102699	0.00711085
1882	2015-07-16 22:00:00	0.0352383	0.0110737	0.00740221
1883	2015-07-16 23:00:00	0.0337272	0.0118775	0.00734874
1884	2015-07-17	0.0334715	0.0118775	0.00734874
1885	2015-07-17 01:00:00	0.0344735	0.0116176	0.00734874
1886	2015-07-17 02:00:00	0.0356265	0.0117736	0.00734874
1887	2015-07-17 03:00:00	0.0345733	0.0121896	0.00785689
1888	2015-07-17 04:00:00	0.0333692	0.0121896	0.00836503
1889	2015-07-17 05:00:00	0.0328673	0.0124249	0.00837178
1890	2015-07-17 06:00:00	0.0327391	0.0126602	0.00856152
1891	2015-07-17 07:00:00	0.0303588	0.0126602	0.00818193
1892	2015-07-17 08:00:00	0.0276049	0.0126602	0.00761934
1893	2015-07-17 09:00:00	0.0274268	0.013153	0.00760233
1894	2015-07-17 10:00:00	0.0283724	0.0136458	0.00758532
1895	2015-07-17 11:00:00	0.0308156	0.0138429	0.00758532
1896	2015-07-17 12:00:00	0.0321351	0.01404	0.00758532
1897	2015-07-17 13:00:00	0.0335417	0.0152114	0.00758532
1898	2015-07-17 14:00:00	0.034272	0.0176277	0.00809328
1899	2015-07-17 15:00:00	0.0350318	0.0188727	0.00860123
1900	2015-07-17 16:00:00	0.0364679	0.0188727	0.00860123
1901	2015-07-17 17:00:00	0.0362383	0.0188727	0.00956546
1902	2015-07-17 18:00:00	0.0348134	0.0190346	0.0105297
1903	2015-07-17 19:00:00	0.0332004	0.0193747	0.0110365
1904	2015-07-17 20:00:00	0.0327825	0.019553	0.0115433
1905	2015-07-17 21:00:00	0.0333461	0.019553	0.0111985
1906	2015-07-17 22:00:00	0.0344786	0.0187492	0.0108537
1907	2015-07-17 23:00:00	0.0354261	0.0179453	0.0108537
1908	2015-07-18	0.0358047	0.0179453	0.0108537
1909	2015-07-18 01:00:00	0.0356419	0.0179453	0.0108537
1910	2015-07-18 02:00:00	0.0356098	0.0175294	0.0108537
1911	2015-07-18 03:00:00	0.0359096	0.0171134	0.0103599
1912	2015-07-18 04:00:00	0.0360788	0.0171134	0.0098662
1913	2015-07-18 05:00:00	0.0362237	0.0174945	0.00980951
1914	2015-07-18 06:00:00	0.0375931	0.0178757	0.0101927
1915	2015-07-18 07:00:00	0.0388875	0.0178757	0.0106325
1916	2015-07-18 08:00:00	0.0389574	0.0178757	0.0106325
1917	2015-07-18 09:00:00	0.0413275	0.0173829	0.0113409
1918	2015-07-18 10:00:00	0.0448961	0.01689	0.0131278
1919	2015-07-18 11:00:00	0.044697	0.0166929	0.0147643
1920	2015-07-18 12:00:00	0.0432993	0.0164958	0.0153225
1921	2015-07-18 13:00:00	0.0429181	0.0153245	0.0153225
1922	2015-07-18 14:00:00	0.0454234	0.0129082	0.0154421
1923	2015-07-18 15:00:00	0.0479116	0.0116632	0.0155617
1924	2015-07-18 16:00:00	0.0475132	0.0116632	0.0155617
1925	2015-07-18 17:00:00	0.0475294	0.0116632	0.0145974
1926	2015-07-18 18:00:00	0.0487975	0.0115013	0.0136332
1927	2015-07-18 19:00:00	0.0497003	0.012165	0.0132901
1928	2015-07-18 20:00:00	0.0493512	0.0129907	0.012947
1929	2015-07-18 21:00:00	0.0495084	0.0139685	0.0131496
1930	2015-07-18 22:00:00	0.0507032	0.0149463	0.0133523
1931	2015-07-18 23:00:00	0.0549015	0.0149463	0.0138673
1932	2015-07-19	0.0580621	0.0149463	0.0143824
1933	2015-07-19 01:00:00	0.0589871	0.0149463	0.0143824
1934	2015-07-19 02:00:00	0.061363	0.0149463	0.0143824
1935	2015-07-19 03:00:00	0.0635591	0.0150779	0.0144234
1936	2015-07-19 04:00:00	0.0643043	0.0152094	0.0144645
1937	2015-07-19 05:00:00	0.0653629	0.014593	0.0144645
1938	2015-07-19 06:00:00	0.0659409	0.0139765	0.0138417
1939	2015-07-19 07:00:00	0.0659595	0.0139765	0.0132188
1940	2015-07-19 08:00:00	0.0664588	0.0139765	0.0132188
1941	2015-07-19 09:00:00	0.0646443	0.0150084	0.0125104
1942	2015-07-19 10:00:00	0.0611133	0.0160403	0.0108871
1943	2015-07-19 11:00:00	0.0611129	0.0160403	0.00941398
1944	2015-07-19 12:00:00	0.0628289	0.0160403	0.00885583
1945	2015-07-19 13:00:00	0.0644319	0.0160403	0.00885583
1946	2015-07-19 14:00:00	0.0670579	0.0160403	0.010761
1947	2015-07-19 15:00:00	0.069226	0.0160403	0.013708
1948	2015-07-19 16:00:00	0.0703713	0.0160403	0.0147499
1949	2015-07-19 17:00:00	0.071754	0.0160403	0.0155195
1950	2015-07-19 18:00:00	0.0734318	0.0160403	0.0162892
1951	2015-07-19 19:00:00	0.0755684	0.0150364	0.0161255
1952	2015-07-19 20:00:00	0.0774099	0.0140324	0.0159617
1953	2015-07-19 21:00:00	0.0782353	0.0130546	0.0157591
1954	2015-07-19 22:00:00	0.0769876	0.011806	0.0154065
1955	2015-07-19 23:00:00	0.0709668	0.0112643	0.0145915
1956	2015-07-20	0.0670191	0.0109935	0.0139264
1957	2015-07-20 01:00:00	0.0649244	0.0107226	0.0137764
1958	2015-07-20 02:00:00	0.0607545	0.010181	0.0134764
1959	2015-07-20 03:00:00	0.0574101	0.00950775	0.0131209
1960	2015-07-20 04:00:00	0.0561408	0.00910539	0.0129154
1961	2015-07-20 05:00:00	0.0548358	0.00883455	0.0127654
1962	2015-07-20 06:00:00	0.0520508	0.00829289	0.0124654
1963	2015-07-20 07:00:00	0.0497129	0.00775122	0.0121654
1964	2015-07-20 08:00:00	0.0488552	0.00748039	0.0120154
1965	2015-07-20 09:00:00	0.048054	0.00617769	0.0118654
1966	2015-07-20 10:00:00	0.0458528	0.00460417	0.0114019
1967	2015-07-20 11:00:00	#N/A	#N/A	#N/A
1968	2015-07-20 12:00:00	#N/A	#N/A	#N/A
1969	2015-07-20 13:00:00	#N/A	#N/A	#N/A
1970	2015-07-20 14:00:00	#N/A	#N/A	#N/A
1971	2015-07-20 15:00:00	#N/A	#N/A	#N/A
1972	2015-07-20 16:00:00	#N/A	#N/A	#N/A
1973	2015-07-20 17:00:00	#N/A	#N/A	#N/A
1974	2015-07-20 18:00:00	#N/A	#N/A	#N/A
1975	2015-07-20 19:00:00	#N/A	#N/A	#N/A
1976	2015-07-20 20:00:00	#N/A	#N/A	#N/A
1977	2015-07-20 21:00:00	#N/A	#N/A	#N/A
1978	2015-07-20 22:00:00	#N/A	#N/A	#N/A
1979	2015-07-20 23:00:00	#N/A	#N/A	#N/A
1980	2015-07-21	#N/A	#N/A	#N/A
1981	2015-07-21 01:00:00	#N/A	#N/A	#N/A
1982	2015-07-21 02:00:00	#N/A	#N/A	#N/A
1983	2015-07-21 03:00:00	#N/A	#N/A	#N/A
1984	2015-07-21 04:00:00	#N/A	#N/A	#N/A
1985	2015-07-21 05:00:00	#N/A	#N/A	#N/A
1986	2015-07-21 06:00:00	#N/A	#N/A	#N/A
1987	2015-07-21 07:00:00	#N/A	#N/A	#N/A
1988	2015-07-21 08:00:00	#N/A	#N/A	#N/A
1989	2015-07-21 09:00:00	#N/A	#N/A	#N/A
1990	2015-07-21 10:00:00	#N/A	#N/A	#N/A
1991	2015-07-21 11:00:00	#N/A	#N/A	#N/A
1992	2015-07-21 12:00:00	#N/A	#N/A	#N/A
1993	2015-07-21 13:00:00	#N/A	#N/A	#N/A
1994	2015-07-21 14:00:00	#N/A	#N/A	#N/A
1995	2015-07-21 15:00:00	#N/A	#N/A	#N/A
1996	2015-07-21 16:00:00	#N/A	#N/A	#N/A
1997	2015-07-21 17:00:00	#N/A	#N/A	#N/A
1998	2015-07-21 18:00:00	#N/A	#N/A	#N/A
1999	2015-07-21 19:00:00	#N/A	#N/A	#N/A
[truncated: 2,223 more rows]

## Sheet: Meteo
	Date	WindS	WindS.1	AirTemp	SnowDepth
1	2015-04-29 13:00:00	0.747083	197	-11.2553	0.36222
2	2015-04-29 14:00:00	0.8806	233.6	-11.0585	0.363968
3	2015-04-29 15:00:00	0.950683	140.6	-10.8855	0.360516
4	2015-04-29 16:00:00	1.5594	186.6	-10.7465	0.363106
5	2015-04-29 17:00:00	1.2903	221.6	-10.6742	0.363386
6	2015-04-29 18:00:00	1.4791	222.5	-10.6508	0.364098
7	2015-04-29 19:00:00	1.41515	234.4	-10.6778	0.364463
8	2015-04-29 20:00:00	1.48512	239.1	-10.7413	0.36583
9	2015-04-29 21:00:00	1.12353	228.7	-10.8438	0.364405
10	2015-04-29 22:00:00	0.845517	224.5	-10.9967	0.363727
11	2015-04-29 23:00:00	2.55585	155.7	-11.181	0.366185
12	2015-04-30	1.15488	230.8	-11.3725	0.366106
13	2015-04-30 01:00:00	0.573133	58	-11.5548	0.363534
14	2015-04-30 02:00:00	0.566417	289.1	-11.7328	0.365109
15	2015-04-30 03:00:00	1.943	157.8	-11.887	0.363554
16	2015-04-30 04:00:00	0.322467	220.7	-11.994	0.364642
17	2015-04-30 05:00:00	0.926217	128.8	-12.057	0.361047
18	2015-04-30 06:00:00	1.09608	168.3	-12.0922	0.363463
19	2015-04-30 07:00:00	2.87107	139.5	-12.0797	0.363467
20	2015-04-30 08:00:00	2.17065	149.8	-12.0008	0.362326
21	2015-04-30 09:00:00	0.833133	185.3	-11.8883	0.364999
22	2015-04-30 10:00:00	1.13352	168.3	-11.7443	0.363987
23	2015-04-30 11:00:00	1.00405	194.7	-11.5922	0.365234
24	2015-04-30 12:00:00	1.29537	215.6	-11.4153	0.36463
25	2015-04-30 13:00:00	0.622433	174.8	-11.2427	0.363982
26	2015-04-30 14:00:00	1.07362	219.6	-11.1102	0.366034
27	2015-04-30 15:00:00	0.869917	170.6	-10.9937	0.363195
28	2015-04-30 16:00:00	1.5816	136.1	-10.8978	0.363775
29	2015-04-30 17:00:00	1.4269	124.9	-10.8207	0.363032
30	2015-04-30 18:00:00	2.07933	131.4	-10.763	0.364517
31	2015-04-30 19:00:00	1.94968	122.4	-10.7252	0.365061
32	2015-04-30 20:00:00	2.59988	117.4	-10.7125	0.365843
33	2015-04-30 21:00:00	1.95467	111.4	-10.7138	0.367165
34	2015-04-30 22:00:00	2.10412	125.2	-10.7305	0.366574
35	2015-04-30 23:00:00	3.04755	116.8	-10.7543	0.365982
36	2015-05-01	3.34968	118.6	-10.7852	0.365024
37	2015-05-01 01:00:00	1.47283	140.6	-10.8145	0.364253
38	2015-05-01 02:00:00	1.78653	110.8	-10.8427	0.363716
39	2015-05-01 03:00:00	1.1808	117.3	-10.866	0.364084
40	2015-05-01 04:00:00	0.3718	104.6	-10.8865	0.362628
41	2015-05-01 05:00:00	2.5445	116.6	-10.9188	0.362518
42	2015-05-01 06:00:00	0.532367	169.1	-10.943	0.361886
43	2015-05-01 07:00:00	0.959617	223.2	-10.9488	0.360715
44	2015-05-01 08:00:00	1.18855	209.1	-10.9097	0.358801
45	2015-05-01 09:00:00	2.04562	229.3	-10.8438	0.363659
46	2015-05-01 10:00:00	2.146	241.4	-10.742	0.362772
47	2015-05-01 11:00:00	1.79093	236	-10.6293	0.364132
48	2015-05-01 12:00:00	2.45272	242.3	-10.4883	0.364245
49	2015-05-01 13:00:00	3.01243	233.4	-10.3473	0.364434
50	2015-05-01 14:00:00	3.14367	230.7	-10.2227	0.363421
51	2015-05-01 15:00:00	2.48968	233.7	-10.1243	0.361992
52	2015-05-01 16:00:00	1.67352	232.3	-10.06	0.361133
53	2015-05-01 17:00:00	1.85672	228.4	-10.0403	0.359723
54	2015-05-01 18:00:00	1.2232	218.3	-10.0538	0.360693
55	2015-05-01 19:00:00	0.247767	100.1	-10.1105	0.357319
56	2015-05-01 20:00:00	0.0853833	267.3	-10.2165	0.360476
57	2015-05-01 21:00:00	0.31875	246.5	-10.3448	0.360814
58	2015-05-01 22:00:00	0.189167	225	-10.4892	0.361308
59	2015-05-01 23:00:00	0.526217	82.8	-10.6423	0.362187
60	2015-05-02	0.66355	181.8	-10.795	0.362084
61	2015-05-02 01:00:00	0.8259	234.3	-10.9342	0.362717
62	2015-05-02 02:00:00	0.284917	225	-11.056	0.362278
63	2015-05-02 03:00:00	0.293783	120.1	-11.1587	0.361984
64	2015-05-02 04:00:00	0.152	104.2	-11.2217	0.355432
65	2015-05-02 05:00:00	0.594583	190.2	-11.2728	0.356253
66	2015-05-02 06:00:00	0.769717	201.7	-11.2862	0.35583
67	2015-05-02 07:00:00	0.00525	225	-11.2743	0.351845
68	2015-05-02 08:00:00	0.286517	225	-11.2437	0.356083
69	2015-05-02 09:00:00	0.153033	184.1	-11.178	0.353455
70	2015-05-02 10:00:00	1.07397	224.3	-11.0927	0.358972
71	2015-05-02 11:00:00	1.06502	227.3	-10.9673	0.360948
72	2015-05-02 12:00:00	0.483883	226.2	-10.8123	0.358199
73	2015-05-02 13:00:00	0.87025	222.8	-10.6508	0.361579
74	2015-05-02 14:00:00	0.924333	240.1	-10.5017	0.362501
75	2015-05-02 15:00:00	0.4444	200.5	-10.3988	0.362816
76	2015-05-02 16:00:00	1.78168	143.1	-10.3393	0.3631
77	2015-05-02 17:00:00	1.34578	218.8	-10.3108	0.365441
78	2015-05-02 18:00:00	0.282733	230	-10.324	0.364363
79	2015-05-02 19:00:00	0.983033	244.5	-10.395	0.366086
80	2015-05-02 20:00:00	0.99185	259.9	-10.4993	0.366105
81	2015-05-02 21:00:00	0.285417	225	-10.633	0.368388
82	2015-05-02 22:00:00	1.63778	107.8	-10.7753	0.367884
83	2015-05-02 23:00:00	1.12245	141.8	-10.9043	0.368761
84	2015-05-03	0.62905	228.3	-11.0135	0.367976
85	2015-05-03 01:00:00	1.35428	244.6	-11.122	0.368205
86	2015-05-03 02:00:00	1.22492	241.5	-11.2438	0.369492
87	2015-05-03 03:00:00	1.7342	142.1	-11.3428	0.369117
88	2015-05-03 04:00:00	0.407117	151.8	-11.3967	0.366917
89	2015-05-03 05:00:00	0.743233	243.4	-11.4225	0.368287
90	2015-05-03 06:00:00	1.25313	249.3	-11.431	0.368867
91	2015-05-03 07:00:00	0.2344	195.5	-11.4148	0.364771
92	2015-05-03 08:00:00	0.32085	299.9	-11.3727	0.358025
93	2015-05-03 09:00:00	0.3242	94.4	-11.2905	0.360249
94	2015-05-03 10:00:00	0.867867	238.2	-11.1767	0.36971
95	2015-05-03 11:00:00	0.226933	241.7	-11.0342	0.362271
96	2015-05-03 12:00:00	0.0625	225	-10.8835	0.363384
97	2015-05-03 13:00:00	0.648017	152	-10.7348	0.364928
98	2015-05-03 14:00:00	0.689583	226.1	-10.6103	0.363996
99	2015-05-03 15:00:00	0.326317	219.2	-10.499	0.355973
100	2015-05-03 16:00:00	0.00498333	225	-10.4173	0.3593
101	2015-05-03 17:00:00	0.186133	126.5	-10.4152	0.366876
102	2015-05-03 18:00:00	0.501283	223	-10.4627	0.36826
103	2015-05-03 19:00:00	0.760067	234.5	-10.5492	0.367195
104	2015-05-03 20:00:00	0.0379333	225	-10.6538	0.358397
105	2015-05-03 21:00:00	0.390983	222.9	-10.7938	0.365422
106	2015-05-03 22:00:00	0.585517	225.3	-10.928	0.36544
107	2015-05-03 23:00:00	0.8762	235.5	-11.0692	0.364054
108	2015-05-04	0.144583	225	-11.2155	0.364039
109	2015-05-04 01:00:00	0.53825	252.8	-11.3645	0.362509
110	2015-05-04 02:00:00	1.03837	212.6	-11.4958	0.35983
111	2015-05-04 03:00:00	2.30143	175.3	-11.6112	0.359678
112	2015-05-04 04:00:00	1.50465	233.3	-11.6887	0.359087
113	2015-05-04 05:00:00	0.991	229.6	-11.7357	0.359412
114	2015-05-04 06:00:00	1.90475	158	-11.7533	0.357572
115	2015-05-04 07:00:00	2.94783	135.1	-11.7352	0.357923
116	2015-05-04 08:00:00	2.02212	179.6	-11.6753	0.362441
117	2015-05-04 09:00:00	3.15987	127.3	-11.5727	0.362961
118	2015-05-04 10:00:00	1.87737	176	-11.4347	0.365043
119	2015-05-04 11:00:00	1.53253	202.7	-11.2698	0.366982
120	2015-05-04 12:00:00	1.41693	226.9	-11.0882	0.36736
121	2015-05-04 13:00:00	1.27923	226.9	-10.9153	0.36619
122	2015-05-04 14:00:00	1.04223	223.8	-10.7525	0.365562
123	2015-05-04 15:00:00	0.626017	207.5	-10.6373	0.361652
124	2015-05-04 16:00:00	1.26435	202.4	-10.5847	0.366631
125	2015-05-04 17:00:00	0.111717	225	-10.5557	0.362629
126	2015-05-04 18:00:00	0.0976167	156.8	-10.5377	0.366322
127	2015-05-04 19:00:00	0.134267	225	-10.5255	0.367308
128	2015-05-04 20:00:00	2.11892	230.9	-10.5197	0.366643
129	2015-05-04 21:00:00	1.28173	187.6	-10.5257	0.362741
130	2015-05-04 22:00:00	0.9886	135.1	-10.5423	0.36472
131	2015-05-04 23:00:00	1.76628	117.3	-10.5602	0.364336
132	2015-05-05	3.52955	120.3	-10.582	0.361231
133	2015-05-05 01:00:00	1.7489	192.8	-10.601	0.367862
134	2015-05-05 02:00:00	3.81952	283.3	-10.6165	0.360456
135	2015-05-05 03:00:00	4.44887	312	-10.6307	0.369738
136	2015-05-05 04:00:00	3.08577	315.2	-10.635	0.354151
137	2015-05-05 05:00:00	3.08005	321	-10.6233	0.362849
138	2015-05-05 06:00:00	1.79377	315.3	-10.6073	0.355895
139	2015-05-05 07:00:00	0.9873	247	-10.5748	0.361177
140	2015-05-05 08:00:00	3.03072	247.1	-10.5307	0.390294
141	2015-05-05 09:00:00	2.3444	247.9	-10.469	0.39919
142	2015-05-05 10:00:00	1.39413	224.3	-10.3995	0.385995
143	2015-05-05 11:00:00	1.30108	202.2	-10.3185	0.357918
144	2015-05-05 12:00:00	0.795517	146	-10.2212	0.356659
145	2015-05-05 13:00:00	2.06848	124.7	-10.1175	0.354705
146	2015-05-05 14:00:00	1.46025	200.7	-10.0117	0.367722
147	2015-05-05 15:00:00	2.6639	143.5	-9.91817	0.362694
148	2015-05-05 16:00:00	3.2896	129.7	-9.852	0.366935
149	2015-05-05 17:00:00	3.09278	133.2	-9.81367	0.366022
150	2015-05-05 18:00:00	1.59525	178.9	-9.8015	0.355494
151	2015-05-05 19:00:00	1.58537	228.9	-9.81433	0.374793
152	2015-05-05 20:00:00	1.24593	225.7	-9.84033	0.376453
153	2015-05-05 21:00:00	1.61853	224.1	-9.87583	0.382416
154	2015-05-05 22:00:00	1.1282	221.7	-9.921	0.385082
155	2015-05-05 23:00:00	0.568683	244.8	-9.96617	0.383503
156	2015-05-06	1.65373	228.5	-10.0187	0.385833
157	2015-05-06 01:00:00	1.7419	231.3	-10.0663	0.384563
158	2015-05-06 02:00:00	1.38752	233.6	-10.1095	0.386392
159	2015-05-06 03:00:00	0.68825	210.3	-10.1618	0.383109
160	2015-05-06 04:00:00	0.767217	200.4	-10.2162	0.385186
161	2015-05-06 05:00:00	0.916067	214.6	-10.2455	0.384954
162	2015-05-06 06:00:00	2.30748	220.9	-10.2477	0.387286
163	2015-05-06 07:00:00	2.48077	185	-10.2227	0.393218
164	2015-05-06 08:00:00	1.56138	183.2	-10.1733	0.383159
165	2015-05-06 09:00:00	1.48075	175.7	-10.1077	0.376682
166	2015-05-06 10:00:00	1.23633	197.8	-10.0278	0.364917
167	2015-05-06 11:00:00	1.78907	201.1	-9.94833	0.376445
168	2015-05-06 12:00:00	2.32118	147.8	-9.87967	0.399049
169	2015-05-06 13:00:00	3.78527	136.4	-9.81717	0.418288
170	2015-05-06 14:00:00	2.09745	135.4	-9.7535	0.416174
171	2015-05-06 15:00:00	2.1034	230.7	-9.69267	0.416982
172	2015-05-06 16:00:00	0.625433	231.5	-9.627	0.41317
173	2015-05-06 17:00:00	0.82165	299.3	-9.57983	0.409545
174	2015-05-06 18:00:00	2.20137	196.9	-9.5435	0.416328
175	2015-05-06 19:00:00	5.65947	116.8	-9.53	0.42041
176	2015-05-06 20:00:00	6.9998	118	-9.5385	0.420596
177	2015-05-06 21:00:00	6.61017	118.1	-9.55417	0.4209
178	2015-05-06 22:00:00	6.62355	117.4	-9.57133	0.420982
179	2015-05-06 23:00:00	8.15538	109	-9.59117	0.40657
180	2015-05-07	8.76048	110.8	-9.61217	0.404967
181	2015-05-07 01:00:00	7.96088	117.7	-9.6385	0.404321
182	2015-05-07 02:00:00	5.35992	125.3	-9.66333	0.403998
183	2015-05-07 03:00:00	3.4003	137.8	-9.68267	0.39977
184	2015-05-07 04:00:00	2.83015	136.9	-9.70017	0.399592
185	2015-05-07 05:00:00	2.08478	110.9	-9.72717	0.399506
186	2015-05-07 06:00:00	0.80635	312	-9.747	0.39913
187	2015-05-07 07:00:00	0.366883	196.4	-9.7435	0.392138
188	2015-05-07 08:00:00	0.159717	244.1	-9.7315	0.38833
189	2015-05-07 09:00:00	0.0196667	225	-9.70467	0.385995
190	2015-05-07 10:00:00	0.80845	110.4	-9.66417	0.394895
191	2015-05-07 11:00:00	1.18905	114.6	-9.608	0.395006
192	2015-05-07 12:00:00	2.03668	163.9	-9.5385	0.39831
193	2015-05-07 13:00:00	1.69633	236.8	-9.46717	0.401306
194	2015-05-07 14:00:00	0.7867	234	-9.39333	0.393711
195	2015-05-07 15:00:00	0.551667	96.8	-9.3305	0.393803
196	2015-05-07 16:00:00	0.428667	195.8	-9.27483	0.39495
197	2015-05-07 17:00:00	3.895	122.1	-9.251	0.397915
198	2015-05-07 18:00:00	6.31493	112.3	-9.234	0.398908
199	2015-05-07 19:00:00	6.94968	92.1	-9.2345	0.400039
200	2015-05-07 20:00:00	6.1672	96.5	-9.25467	0.399056
201	2015-05-07 21:00:00	6.5992	112.8	-9.29117	0.397924
202	2015-05-07 22:00:00	2.83695	140.5	-9.33933	0.396022
203	2015-05-07 23:00:00	2.46318	79.2	-9.39233	0.396228
204	2015-05-08	7.3429	113	-9.44617	0.395854
205	2015-05-08 01:00:00	8.11987	111.7	-9.49833	0.394624
206	2015-05-08 02:00:00	8.39528	110.3	-9.54217	0.392043
207	2015-05-08 03:00:00	7.904	109.5	-9.576	0.390955
208	2015-05-08 04:00:00	8.22535	113	-9.5985	0.389844
209	2015-05-08 05:00:00	8.29003	107.5	-9.60517	0.390448
210	2015-05-08 06:00:00	8.96878	111.5	-9.60183	0.390825
211	2015-05-08 07:00:00	9.30908	114.6	-9.58283	0.389593
212	2015-05-08 08:00:00	9.3085	113	-9.54517	0.385305
213	2015-05-08 09:00:00	9.07567	118.1	-9.5	0.38244
214	2015-05-08 10:00:00	9.45467	125.6	-9.43917	0.381288
215	2015-05-08 11:00:00	9.057	127.9	-9.362	0.379167
216	2015-05-08 12:00:00	9.196	128.1	-9.284	0.379968
217	2015-05-08 13:00:00	8.49943	125.7	-9.20933	0.381623
218	2015-05-08 14:00:00	7.85133	127	-9.14	0.381218
219	2015-05-08 15:00:00	6.81072	127.1	-9.07867	0.379541
220	2015-05-08 16:00:00	5.50895	122.7	-9.03083	0.37744
221	2015-05-08 17:00:00	4.66363	125.3	-8.998	0.376029
222	2015-05-08 18:00:00	6.1262	128.9	-8.98133	0.374369
223	2015-05-08 19:00:00	6.42227	135.4	-8.98267	0.372655
224	2015-05-08 20:00:00	4.28895	140	-9.00317	0.369262
225	2015-05-08 21:00:00	1.99287	151.5	-9.03583	0.366925
226	2015-05-08 22:00:00	3.55613	125.8	-9.093	0.370707
227	2015-05-08 23:00:00	2.01053	139.1	-9.15517	0.371953
228	2015-05-09	0.648833	217.5	-9.22283	0.375136
229	2015-05-09 01:00:00	0.751533	135.6	-9.2965	0.372863
230	2015-05-09 02:00:00	1.64735	142.6	-9.37317	0.374782
231	2015-05-09 03:00:00	2.83227	137.4	-9.444	0.375844
232	2015-05-09 04:00:00	2.83982	135.7	-9.49483	0.375107
233	2015-05-09 05:00:00	4.33967	133	-9.52833	0.378198
234	2015-05-09 06:00:00	3.96715	130.1	-9.535	0.375861
235	2015-05-09 07:00:00	2.67863	163.6	-9.5175	0.374961
236	2015-05-09 08:00:00	2.80022	186.3	-9.48767	0.377079
237	2015-05-09 09:00:00	1.97152	217.6	-9.4345	0.376602
238	2015-05-09 10:00:00	1.53505	221.6	-9.38417	0.376774
239	2015-05-09 11:00:00	1.6186	223.9	-9.31333	0.376744
240	2015-05-09 12:00:00	1.98117	264.8	-9.2475	0.377595
241	2015-05-09 13:00:00	0.639817	344.6	-9.18767	0.372829
242	2015-05-09 14:00:00	0.816233	286.4	-9.1355	0.374682
243	2015-05-09 15:00:00	1.75182	230	-9.0875	0.377198
244	2015-05-09 16:00:00	1.0578	233.2	-9.052	0.376806
245	2015-05-09 17:00:00	1.69068	203.3	-9.03067	0.376441
246	2015-05-09 18:00:00	2.3402	225.3	-9.019	0.37713
247	2015-05-09 19:00:00	1.27482	217.4	-9.01733	0.376948
248	2015-05-09 20:00:00	0.986417	244.4	-9.0235	0.375341
249	2015-05-09 21:00:00	1.84023	242.3	-9.03617	0.372591
250	2015-05-09 22:00:00	1.03265	266.4	-9.06133	0.370016
251	2015-05-09 23:00:00	1.13567	268.7	-9.08133	0.375314
252	2015-05-10	0.611683	241.5	-9.10083	0.372141
253	2015-05-10 01:00:00	0.493583	209.8	-9.12317	0.373908
254	2015-05-10 02:00:00	0.779383	183.3	-9.143	0.370416
255	2015-05-10 03:00:00	1.28287	138.6	-9.15917	0.37361
256	2015-05-10 04:00:00	1.50418	213.4	-9.17183	0.373375
257	2015-05-10 05:00:00	0.823433	159.1	-9.17783	0.369966
258	2015-05-10 06:00:00	1.69217	219.6	-9.18583	0.370729
259	2015-05-10 07:00:00	0.705733	228.8	-9.1785	0.370658
260	2015-05-10 08:00:00	0.96435	221.5	-9.1605	0.372904
261	2015-05-10 09:00:00	0.913867	220.3	-9.13583	0.370651
262	2015-05-10 10:00:00	0.184133	231.9	-9.08733	0.367831
263	2015-05-10 11:00:00	0.775017	221.3	-9.04567	0.370214
264	2015-05-10 12:00:00	0.821583	245.1	-8.998	0.370248
265	2015-05-10 13:00:00	1.09938	236.7	-8.95533	0.375176
266	2015-05-10 14:00:00	0.708233	101.6	-8.91217	0.37509
267	2015-05-10 15:00:00	0.918367	132.2	-8.86567	0.375309
268	2015-05-10 16:00:00	0.798	242.3	-8.80967	0.374773
269	2015-05-10 17:00:00	0.543617	235.3	-8.76517	0.377399
270	2015-05-10 18:00:00	1.16107	229.8	-8.73167	0.380108
271	2015-05-10 19:00:00	1.92222	226.4	-8.71367	0.38149
272	2015-05-10 20:00:00	2.50002	217.3	-8.71233	0.381914
273	2015-05-10 21:00:00	3.18198	222.6	-8.71783	0.381816
274	2015-05-10 22:00:00	3.08695	221.3	-8.73133	0.382621
275	2015-05-10 23:00:00	3.12483	233.9	-8.75383	0.382681
276	2015-05-11	2.95075	224.4	-8.7845	0.382619
277	2015-05-11 01:00:00	1.78025	226.4	-8.81883	0.383194
278	2015-05-11 02:00:00	0.294117	128.7	-8.84483	0.380238
279	2015-05-11 03:00:00	0.265417	232.8	-8.86833	0.380856
280	2015-05-11 04:00:00	0.26165	223.7	-8.88217	0.380143
281	2015-05-11 05:00:00	0.39675	266.8	-8.881	0.377798
282	2015-05-11 06:00:00	0.326417	38.7	-8.86933	0.375784
283	2015-05-11 07:00:00	0.1056	225	-8.84683	0.374698
284	2015-05-11 08:00:00	0.25845	118	-8.81283	0.371412
285	2015-05-11 09:00:00	0.0213167	225	-8.7665	0.371816
286	2015-05-11 10:00:00	0.0539833	225	-8.711	0.373724
287	2015-05-11 11:00:00	0.153583	310.8	-8.65283	0.369733
288	2015-05-11 12:00:00	0.2434	323.5	-8.59767	0.373128
289	2015-05-11 13:00:00	0.980483	91.6	-8.55	0.376966
290	2015-05-11 14:00:00	1.54038	134	-8.51417	0.377572
291	2015-05-11 15:00:00	1.3991	129.5	-8.487	0.378121
292	2015-05-11 16:00:00	1.85822	123.2	-8.474	0.378252
293	2015-05-11 17:00:00	3.25147	123.3	-8.46917	0.379063
294	2015-05-11 18:00:00	4.65828	125.7	-8.47733	0.379123
295	2015-05-11 19:00:00	5.02692	130.1	-8.49567	0.378735
296	2015-05-11 20:00:00	5.13022	126.8	-8.5255	0.37797
297	2015-05-11 21:00:00	5.13812	127	-8.5665	0.377076
298	2015-05-11 22:00:00	5.32768	128.2	-8.60833	0.376187
299	2015-05-11 23:00:00	4.82463	129	-8.65083	0.376399
300	2015-05-12	5.10638	124.9	-8.69217	0.376958
301	2015-05-12 01:00:00	3.48958	129.5	-8.72883	0.377658
302	2015-05-12 02:00:00	1.43053	143.2	-8.7605	0.37634
303	2015-05-12 03:00:00	1.73467	149.8	-8.78467	0.374328
304	2015-05-12 04:00:00	1.06128	208.7	-8.8035	0.371974
305	2015-05-12 05:00:00	2.61817	110.8	-8.80867	0.370431
306	2015-05-12 06:00:00	3.4769	123.2	-8.8065	0.371138
307	2015-05-12 07:00:00	2.81122	131.3	-8.79733	0.370839
308	2015-05-12 08:00:00	3.10705	126.1	-8.77967	0.370884
309	2015-05-12 09:00:00	2.07982	137.8	-8.74917	0.368613
310	2015-05-12 10:00:00	1.9816	133	-8.71183	0.368709
311	2015-05-12 11:00:00	2.0047	145.9	-8.671	0.368659
312	2015-05-12 12:00:00	1.02645	139.4	-8.61817	0.364745
313	2015-05-12 13:00:00	0.6594	159.5	-8.56667	0.364972
314	2015-05-12 14:00:00	1.50545	118.1	-8.5055	0.366442
315	2015-05-12 15:00:00	1.4902	125.1	-8.45283	0.367183
316	2015-05-12 16:00:00	2.14723	200.4	-8.404	0.367757
317	2015-05-12 17:00:00	2.80255	213.4	-8.36967	0.373128
318	2015-05-12 18:00:00	3.44498	215.5	-8.35633	0.374694
319	2015-05-12 19:00:00	2.48783	190.9	-8.3555	0.375049
320	2015-05-12 20:00:00	1.53863	146.4	-8.36883	0.374822
321	2015-05-12 21:00:00	1.66178	121.1	-8.38817	0.3758
322	2015-05-12 22:00:00	1.66883	124.8	-8.41617	0.374643
323	2015-05-12 23:00:00	1.4844	118	-8.44567	0.373739
324	2015-05-13	3.78427	113.2	-8.48183	0.375047
325	2015-05-13 01:00:00	2.73147	121.3	-8.5235	0.373059
326	2015-05-13 02:00:00	1.07925	113.7	-8.56567	0.36793
327	2015-05-13 03:00:00	1.43808	99.5	-8.60267	0.362007
328	2015-05-13 04:00:00	0.708983	119	-8.64983	0.367501
329	2015-05-13 05:00:00	0.609833	114.4	-8.67767	0.366981
330	2015-05-13 06:00:00	1.22398	101.6	-8.69433	0.365412
331	2015-05-13 07:00:00	1.01352	119.7	-8.68133	0.358295
332	2015-05-13 08:00:00	1.50077	111.1	-8.64383	0.353677
333	2015-05-13 09:00:00	2.79803	123.6	-8.5945	0.358312
334	2015-05-13 10:00:00	1.4789	123.2	-8.527	0.358354
335	2015-05-13 11:00:00	0.85825	193.1	-8.45667	0.361393
336	2015-05-13 12:00:00	0.4698	248.6	-8.3765	0.365707
337	2015-05-13 13:00:00	1.36675	229.5	-8.311	0.370486
338	2015-05-13 14:00:00	1.44588	234.2	-8.2505	0.366796
339	2015-05-13 15:00:00	1.63503	241.5	-8.2	0.367778
340	2015-05-13 16:00:00	2.22423	234.1	-8.16667	0.367301
341	2015-05-13 17:00:00	2.43365	236.2	-8.156	0.363076
342	2015-05-13 18:00:00	3.11832	235.6	-8.1585	0.36536
343	2015-05-13 19:00:00	2.99518	231.7	-8.18917	0.366402
344	2015-05-13 20:00:00	3.16933	229.3	-8.2475	0.36861
345	2015-05-13 21:00:00	1.8732	203.7	-8.313	0.366493
346	2015-05-13 22:00:00	0.141933	170.7	-8.38117	0.363583
347	2015-05-13 23:00:00	0.687267	142	-8.44483	0.359561
348	2015-05-14	1.97255	238	-8.51167	0.362574
349	2015-05-14 01:00:00	3.01383	243.5	-8.573	0.367373
350	2015-05-14 02:00:00	1.95808	157.1	-8.61717	0.3625
351	2015-05-14 03:00:00	1.37432	111.8	-8.64417	0.361514
352	2015-05-14 04:00:00	0.920367	161.7	-8.6565	0.363666
353	2015-05-14 05:00:00	0.6935	147.6	-8.65633	0.361476
354	2015-05-14 06:00:00	1.35495	177.8	-8.6505	0.362552
355	2015-05-14 07:00:00	4.4191	222	-8.632	0.364418
356	2015-05-14 08:00:00	5.2401	204.5	-8.59633	0.362157
357	2015-05-14 09:00:00	3.78163	161.1	-8.54783	0.363659
358	2015-05-14 10:00:00	2.58693	144.1	-8.494	0.364026
359	2015-05-14 11:00:00	4.93502	209.3	-8.4355	0.369669
360	2015-05-14 12:00:00	5.1817	212.5	-8.37433	0.370453
361	2015-05-14 13:00:00	5.26648	215.6	-8.30867	0.36752
362	2015-05-14 14:00:00	5.41905	217.3	-8.25933	0.365991
363	2015-05-14 15:00:00	5.81385	216.7	-8.21533	0.365115
364	2015-05-14 16:00:00	4.96473	214.9	-8.17717	0.363789
365	2015-05-14 17:00:00	2.30658	187.2	-8.14517	0.363326
366	2015-05-14 18:00:00	2.77163	134.2	-8.1195	0.365136
367	2015-05-14 19:00:00	2.90667	128.2	-8.097	0.368755
368	2015-05-14 20:00:00	2.20193	139.9	-8.10867	0.373076
369	2015-05-14 21:00:00	2.43662	138.8	-8.13033	0.377583
370	2015-05-14 22:00:00	4.95397	123.3	-8.1715	0.380576
371	2015-05-14 23:00:00	3.72083	120.5	-8.20533	0.381477
372	2015-05-15	4.04648	120.8	-8.23017	0.37958
373	2015-05-15 01:00:00	2.27902	183.9	-8.24933	0.378628
374	2015-05-15 02:00:00	2.07417	214.8	-8.26867	0.38031
375	2015-05-15 03:00:00	7.3369	254.3	-8.27517	0.391552
376	2015-05-15 04:00:00	4.31423	256.7	-8.27633	0.388219
377	2015-05-15 05:00:00	1.75078	203.5	-8.273	0.387631
378	2015-05-15 06:00:00	3.13822	120.9	-8.26517	0.383083
379	2015-05-15 07:00:00	3.04608	162.3	-8.24467	0.380229
380	2015-05-15 08:00:00	1.41598	178.7	-8.2	0.375858
381	2015-05-15 09:00:00	1.32823	95.7	-8.152	0.375408
382	2015-05-15 10:00:00	1.83523	132.3	-8.086	0.372368
383	2015-05-15 11:00:00	1.21452	154.1	-8.01163	0.367428
384	2015-05-15 12:00:00	2.63855	160.2	-7.9441	0.370309
385	2015-05-15 13:00:00	4.41278	190.2	-7.8843	0.369764
386	2015-05-15 14:00:00	2.29407	155.8	-7.8262	0.368164
387	2015-05-15 15:00:00	2.22665	191.6	-7.78923	0.370993
388	2015-05-15 16:00:00	1.7844	216.4	-7.76067	0.371412
389	2015-05-15 17:00:00	1.35922	155.3	-7.74203	0.372334
390	2015-05-15 18:00:00	4.42867	188.7	-7.7375	0.374084
391	2015-05-15 19:00:00	3.62697	153.7	-7.73833	0.377465
392	2015-05-15 20:00:00	3.96232	117.6	-7.74698	0.377706
393	2015-05-15 21:00:00	2.8967	116.7	-7.75877	0.378364
394	2015-05-15 22:00:00	2.90632	159.8	-7.77163	0.379394
395	2015-05-15 23:00:00	2.79208	151	-7.7907	0.379759
396	2015-05-16	2.12	138.5	-7.81528	0.380105
397	2015-05-16 01:00:00	2.77198	122.7	-7.82654	0.380121
398	2015-05-16 02:00:00	3.20605	167.5	-7.84075	0.379853
399	2015-05-16 03:00:00	3.7284	149.2	-7.85577	0.380478
400	2015-05-16 04:00:00	3.20372	129.8	-7.85885	0.38048
401	2015-05-16 05:00:00	2.3525	134.3	-7.855	0.380234
402	2015-05-16 06:00:00	3.30778	182.8	-7.83992	0.381949
403	2015-05-16 07:00:00	3.64998	185.5	-7.81443	0.384651
404	2015-05-16 08:00:00	4.9202	200	-7.76907	0.38231
405	2015-05-16 09:00:00	4.53393	173.6	-7.63355	0.374506
406	2015-05-16 10:00:00	4.28963	186.3	-7.41185	0.373655
407	2015-05-16 11:00:00	1.96143	103.9	-7.13807	0.371872
408	2015-05-16 12:00:00	3.90595	178.7	-6.85298	0.373451
409	2015-05-16 13:00:00	6.15142	202.6	-6.65743	0.373661
410	2015-05-16 14:00:00	7.2142	205.6	-6.39952	0.372921
411	2015-05-16 15:00:00	9.49433	218.4	-6.22622	0.368891
412	2015-05-16 16:00:00	8.42627	217.3	-6.08133	0.37126
413	2015-05-16 17:00:00	6.89263	219.5	-5.96728	0.368699
414	2015-05-16 18:00:00	7.37762	226.5	-5.89172	0.369151
415	2015-05-16 19:00:00	5.35415	286.8	-5.83767	0.372489
416	2015-05-16 20:00:00	7.21608	314.5	-5.79478	0.369991
417	2015-05-16 21:00:00	6.03498	304.1	-5.76195	0.36834
418	2015-05-16 22:00:00	7.04627	270.9	-5.73318	0.367212
419	2015-05-16 23:00:00	6.90972	266.9	-5.70865	0.370445
420	2015-05-17	6.6427	311.9	-5.68692	0.373508
421	2015-05-17 01:00:00	7.19227	309.4	-5.6674	0.367167
422	2015-05-17 02:00:00	6.42643	306.6	-5.65047	0.368379
423	2015-05-17 03:00:00	3.51913	256.3	-5.63382	0.367641
424	2015-05-17 04:00:00	2.3813	233.8	-5.61392	0.366829
425	2015-05-17 05:00:00	2.78745	247.4	-5.59655	0.365952
426	2015-05-17 06:00:00	3.50518	302.2	-5.58232	0.365905
427	2015-05-17 07:00:00	5.44767	320.5	-5.57043	0.366733
428	2015-05-17 08:00:00	6.348	317.5	-5.55222	0.366476
429	2015-05-17 09:00:00	6.2104	316.9	-5.53642	0.366663
430	2015-05-17 10:00:00	6.31673	316.1	-5.53462	0.367419
431	2015-05-17 11:00:00	6.62815	317.5	-5.5387	0.36789
432	2015-05-17 12:00:00	6.36218	318.5	-5.56237	0.3691
433	2015-05-17 13:00:00	5.35542	314.8	-5.60467	0.36951
434	2015-05-17 14:00:00	4.9904	320.1	-5.66925	0.369555
435	2015-05-17 15:00:00	4.44637	320.7	-5.73852	0.369287
436	2015-05-17 16:00:00	2.16277	304.9	-5.80532	0.364128
437	2015-05-17 17:00:00	3.63848	310.9	-5.87562	0.364691
438	2015-05-17 18:00:00	3.61055	322	-5.95002	0.366017
439	2015-05-17 19:00:00	2.30173	289.8	-6.02425	0.366154
440	2015-05-17 20:00:00	1.42078	270	-6.10297	0.365772
441	2015-05-17 21:00:00	0.9768	311.7	-6.18162	0.366185
442	2015-05-17 22:00:00	1.38032	166.8	-6.25937	0.36604
443	2015-05-17 23:00:00	0.761717	156.4	-6.3354	0.365604
444	2015-05-18	1.49538	149.4	-6.4059	0.365199
445	2015-05-18 01:00:00	2.44727	127.6	-6.472	0.365923
446	2015-05-18 02:00:00	4.0343	125.3	-6.52973	0.365618
447	2015-05-18 03:00:00	5.58923	126.6	-6.58457	0.365192
448	2015-05-18 04:00:00	6.45957	118	-6.63	0.364955
449	2015-05-18 05:00:00	7.20125	115	-6.6729	0.365099
450	2015-05-18 06:00:00	6.07655	117.1	-6.70177	0.365222
451	2015-05-18 07:00:00	5.25345	123.6	-6.71582	0.364712
452	2015-05-18 08:00:00	4.8749	126.7	-6.6872	0.363061
453	2015-05-18 09:00:00	3.95072	123.6	-6.6588	0.363984
454	2015-05-18 10:00:00	2.85733	149.1	-6.619	0.364341
455	2015-05-18 11:00:00	1.73593	209	-6.5796	0.364901
456	2015-05-18 12:00:00	1.35797	161.7	-6.52387	0.361266
457	2015-05-18 13:00:00	0.574317	195.4	-6.45255	0.359499
458	2015-05-18 14:00:00	1.10862	208.2	-6.38037	0.363729
459	2015-05-18 15:00:00	1.17747	186.8	-6.31247	0.365231
460	2015-05-18 16:00:00	2.97058	204.1	-6.26155	0.365637
461	2015-05-18 17:00:00	2.49488	176.9	-6.22097	0.365942
462	2015-05-18 18:00:00	4.09905	194.2	-6.19772	0.367061
463	2015-05-18 19:00:00	5.17943	196.6	-6.18578	0.367546
464	2015-05-18 20:00:00	4.49305	195.6	-6.18355	0.366998
465	2015-05-18 21:00:00	5.61347	197.7	-6.19108	0.367122
466	2015-05-18 22:00:00	6.49928	205.4	-6.2065	0.367055
467	2015-05-18 23:00:00	7.18053	212.8	-6.229	0.367804
468	2015-05-19	6.2786	211.2	-6.25307	0.367759
469	2015-05-19 01:00:00	2.3175	168.1	-6.27838	0.3674
470	2015-05-19 02:00:00	1.43445	163.8	-6.30702	0.367276
471	2015-05-19 03:00:00	0.64755	162.9	-6.32757	0.365727
472	2015-05-19 04:00:00	0.927267	186.9	-6.33998	0.365345
473	2015-05-19 05:00:00	0.9169	137.1	-6.33508	0.364305
474	2015-05-19 06:00:00	1.6644	209.8	-6.33245	0.365136
475	2015-05-19 07:00:00	0.166783	225	-6.32698	0.359647
476	2015-05-19 08:00:00	1.03123	185.3	-6.31852	0.35947
477	2015-05-19 09:00:00	1.90052	141.5	-6.30372	0.36319
478	2015-05-19 10:00:00	0.838067	167.8	-6.28453	0.370885
479	2015-05-19 11:00:00	0.5573	237.2	-6.26193	0.353453
480	2015-05-19 12:00:00	1.36048	172.9	-6.2436	0.347333
481	2015-05-19 13:00:00	2.6959	122.1	-6.23047	0.34013
482	2015-05-19 14:00:00	2.633	128	-6.21743	0.328798
483	2015-05-19 15:00:00	2.55278	120.7	-6.20317	0.337854
484	2015-05-19 16:00:00	2.07835	133.8	-6.18917	0.347415
485	2015-05-19 17:00:00	3.02552	143.1	-6.18042	0.337544
486	2015-05-19 18:00:00	2.1443	171.2	-6.17793	0.346731
487	2015-05-19 19:00:00	1.22223	198.2	-6.17773	0.337128
488	2015-05-19 20:00:00	0.45115	238.5	-6.1891	0.342423
489	2015-05-19 21:00:00	2.23925	226.1	-6.20313	0.338891
490	2015-05-19 22:00:00	2.03668	217.7	-6.20632	0.345479
491	2015-05-19 23:00:00	2.4328	178.3	-6.21747	0.356241
492	2015-05-20	2.04373	203.3	-6.22338	0.355774
493	2015-05-20 01:00:00	1.95752	221.6	-6.23815	0.354392
494	2015-05-20 02:00:00	3.98728	216.2	-6.25173	0.356228
495	2015-05-20 03:00:00	1.7377	62.9	-6.25857	0.353592
496	2015-05-20 04:00:00	0.526717	89.5	-6.25693	0.352299
497	2015-05-20 05:00:00	2.19013	175.1	-6.2431	0.349272
498	2015-05-20 06:00:00	1.05133	267.5	-6.22735	0.34981
499	2015-05-20 07:00:00	0.725367	322.7	-6.19378	0.346381
500	2015-05-20 08:00:00	0.447067	6.6	-6.15562	0.34001
501	2015-05-20 09:00:00	4.26698	332.8	-6.12352	0.355272
502	2015-05-20 10:00:00	2.41782	336.1	-6.06775	0.34894
503	2015-05-20 11:00:00	1.01668	275.7	-6.00532	0.34468
504	2015-05-20 12:00:00	0.59665	228.1	-5.93835	0.341471
505	2015-05-20 13:00:00	0.120883	31.1	-5.87548	0.331898
506	2015-05-20 14:00:00	0.207933	19.4	-5.83072	0.335883
507	2015-05-20 15:00:00	1.75798	358.9	-5.78507	0.342971
508	2015-05-20 16:00:00	3.17147	326.6	-5.71402	0.345916
509	2015-05-20 17:00:00	3.38853	330.7	-5.66468	0.34809
510	2015-05-20 18:00:00	3.56062	329.6	-5.61392	0.345216
511	2015-05-20 19:00:00	2.90402	345.4	-5.55188	0.343322
512	2015-05-20 20:00:00	1.40627	22.5	-5.49347	0.341791
513	2015-05-20 21:00:00	0.2377	156.1	-5.44545	0.331769
514	2015-05-20 22:00:00	0.953517	170.7	-5.42147	0.336907
515	2015-05-20 23:00:00	0.294617	236.1	-5.40295	0.333385
516	2015-05-21	0.3227	267.6	-5.39005	0.342063
517	2015-05-21 01:00:00	0.6304	253.3	-5.39388	0.343833
518	2015-05-21 02:00:00	0.327383	243	-5.39082	0.342319
519	2015-05-21 03:00:00	0.330033	232.2	-5.39115	0.342022
520	2015-05-21 04:00:00	0.257383	225	-5.39475	0.342274
521	2015-05-21 05:00:00	0.000116667	225	-5.3936	0.339609
522	2015-05-21 06:00:00	0.232117	225	-5.3992	0.339223
523	2015-05-21 07:00:00	0.694	238.7	-5.40328	0.339824
524	2015-05-21 08:00:00	0.198733	327.3	-5.40205	0.336358
525	2015-05-21 09:00:00	0.549117	239.9	-5.38807	0.337922
526	2015-05-21 10:00:00	0.07435	225	-5.35523	0.330111
527	2015-05-21 11:00:00	0.438583	339.2	-5.34172	0.334985
528	2015-05-21 12:00:00	1.49645	299	-5.30998	0.338286
529	2015-05-21 13:00:00	0.917917	279.5	-5.27578	0.334646
530	2015-05-21 14:00:00	0.572317	298.7	-5.24938	0.331079
531	2015-05-21 15:00:00	0.870733	42.2	-5.21847	0.331794
532	2015-05-21 16:00:00	3.84762	324.8	-5.19322	0.336044
533	2015-05-21 17:00:00	5.86782	310.3	-5.16498	0.337048
534	2015-05-21 18:00:00	2.96108	346.4	-5.1403	0.335218
535	2015-05-21 19:00:00	1.51703	27	-5.1228	0.334566
536	2015-05-21 20:00:00	0.778567	78.8	-5.1216	0.335051
537	2015-05-21 21:00:00	0.12945	225	-5.11595	0.332884
538	2015-05-21 22:00:00	0.40755	280.1	-5.11575	0.334173
539	2015-05-21 23:00:00	0.915517	214.9	-5.11667	0.335887
540	2015-05-22	1.86245	141	-5.11827	0.335379
541	2015-05-22 01:00:00	3.98725	133.7	-5.11723	0.334443
542	2015-05-22 02:00:00	1.30942	158.7	-5.11837	0.333525
543	2015-05-22 03:00:00	0.90805	199.5	-5.11298	0.334555
544	2015-05-22 04:00:00	0.756817	244.4	-5.09535	0.332988
545	2015-05-22 05:00:00	2.39197	325	-5.07653	0.333147
546	2015-05-22 06:00:00	3.71178	344.6	-5.04885	0.331553
547	2015-05-22 07:00:00	7.58658	349.4	-5.03298	0.332186
548	2015-05-22 08:00:00	7.06247	343.1	-5.00747	0.333276
549	2015-05-22 09:00:00	6.81722	336.6	-4.96077	0.332927
550	2015-05-22 10:00:00	7.94488	346.6	-4.92417	0.331576
551	2015-05-22 11:00:00	7.59447	340.3	-4.89477	0.332088
552	2015-05-22 12:00:00	7.8838	330.5	-4.86218	0.330737
553	2015-05-22 13:00:00	8.85077	324.1	-4.8293	0.328139
554	2015-05-22 14:00:00	9.4045	330.4	-4.80483	0.324188
555	2015-05-22 15:00:00	9.95115	325.8	-4.80027	0.325869
556	2015-05-22 16:00:00	9.79733	330	-4.81162	0.325314
557	2015-05-22 17:00:00	9.6542	336.2	-4.83662	0.322882
558	2015-05-22 18:00:00	9.25283	342	-4.88762	0.321813
559	2015-05-22 19:00:00	8.89627	350	-4.96035	0.322998
560	2015-05-22 20:00:00	9.644	352.3	-5.05822	0.323067
561	2015-05-22 21:00:00	9.08287	348.6	-5.16843	0.323102
562	2015-05-22 22:00:00	8.02847	354	-5.27893	0.326459
563	2015-05-22 23:00:00	6.51563	350.3	-5.36608	0.326753
564	2015-05-23	4.95903	346.4	-5.42655	0.326949
565	2015-05-23 01:00:00	4.18845	335	-5.4908	0.327366
566	2015-05-23 02:00:00	4.52158	321.4	-5.55327	0.328297
567	2015-05-23 03:00:00	3.8643	319.5	-5.61435	0.327367
568	2015-05-23 04:00:00	3.02065	317.6	-5.66468	0.328329
569	2015-05-23 05:00:00	4.4238	315.3	-5.69913	0.328681
570	2015-05-23 06:00:00	4.35947	324.2	-5.71298	0.326406
571	2015-05-23 07:00:00	4.02372	320.6	-5.69832	0.326759
572	2015-05-23 08:00:00	2.15328	341.3	-5.6496	0.325407
573	2015-05-23 09:00:00	2.4295	113.6	-5.56528	0.325511
574	2015-05-23 10:00:00	2.34218	112.9	-5.44647	0.32674
575	2015-05-23 11:00:00	0.91595	124.1	-5.31452	0.324404
576	2015-05-23 12:00:00	0.395933	188.2	-5.18502	0.318837
577	2015-05-23 13:00:00	0.340517	175	-5.07918	0.316913
578	2015-05-23 14:00:00	1.06217	157.3	-4.99973	0.319993
579	2015-05-23 15:00:00	0.244183	182	-4.93015	0.315241
580	2015-05-23 16:00:00	1.79687	147.4	-4.89338	0.322331
581	2015-05-23 17:00:00	1.44165	189.4	-4.86802	0.319914
582	2015-05-23 18:00:00	1.42918	160.8	-4.84957	0.320368
583	2015-05-23 19:00:00	1.41435	208.5	-4.85398	0.323182
584	2015-05-23 20:00:00	1.24977	215.8	-4.85603	0.322314
585	2015-05-23 21:00:00	1.02385	149	-4.88198	0.316722
586	2015-05-23 22:00:00	1.17035	232.4	-4.9565	0.323964
587	2015-05-23 23:00:00	0.237033	144.3	-5.08457	0.317898
588	2015-05-24	0.283717	225	-5.23267	0.322707
589	2015-05-24 01:00:00	0.18715	76.7	-5.37865	0.319259
590	2015-05-24 02:00:00	0.05715	225	-5.5195	0.321352
591	2015-05-24 03:00:00	0.621667	240.3	-5.6518	0.323496
592	2015-05-24 04:00:00	0.521383	95.1	-5.76463	0.315015
593	2015-05-24 05:00:00	0.829617	116	-5.83343	0.311783
594	2015-05-24 06:00:00	0.380583	269.2	-5.8654	0.321748
595	2015-05-24 07:00:00	0.310417	250.9	-5.85538	0.312612
596	2015-05-24 08:00:00	0.01165	225	-5.79898	0.311495
597	2015-05-24 09:00:00	0.177183	225	-5.69122	0.31171
598	2015-05-24 10:00:00	0.62025	110.7	-5.5597	0.32256
599	2015-05-24 11:00:00	0.2484	240.3	-5.40902	0.325582
600	2015-05-24 12:00:00	0	225	-5.26583	0.318337
601	2015-05-24 13:00:00	3.33333e-05	225	-5.14783	0.312708
602	2015-05-24 14:00:00	0.0141167	225	-5.06568	0.316206
603	2015-05-24 15:00:00	0.0105833	225	-5.00353	0.318421
604	2015-05-24 16:00:00	0.1195	225	-4.96537	0.325019
605	2015-05-24 17:00:00	1.08963	321.2	-4.90945	0.323545
606	2015-05-24 18:00:00	2.27205	320.2	-4.90237	0.330487
607	2015-05-24 19:00:00	2.78482	316.9	-4.89093	0.330529
608	2015-05-24 20:00:00	2.85272	313.5	-4.90377	0.331804
609	2015-05-24 21:00:00	2.65158	298.4	-4.9198	0.332411
610	2015-05-24 22:00:00	3.78215	302.5	-4.94728	0.33239
611	2015-05-24 23:00:00	4.14878	309.2	-4.98588	0.332065
612	2015-05-25	4.4706	312.4	-5.03145	0.332156
613	2015-05-25 01:00:00	4.36502	311.6	-5.07815	0.331656
614	2015-05-25 02:00:00	3.52303	301.8	-5.11482	0.331211
615	2015-05-25 03:00:00	3.09235	302.8	-5.14678	0.331306
616	2015-05-25 04:00:00	1.87645	313	-5.16803	0.330522
617	2015-05-25 05:00:00	2.42333	319.9	-5.16427	0.330176
618	2015-05-25 06:00:00	2.42158	345.2	-5.15347	0.329876
619	2015-05-25 07:00:00	2.1219	350.1	-5.12593	0.328887
620	2015-05-25 08:00:00	0.95065	344.9	-5.08555	0.326167
621	2015-05-25 09:00:00	0.4282	232.2	-5.0142	0.320021
622	2015-05-25 10:00:00	1.26638	122.2	-4.93923	0.325388
623	2015-05-25 11:00:00	2.68157	125	-4.87597	0.328276
624	2015-05-25 12:00:00	2.78178	118.6	-4.82012	0.329112
625	2015-05-25 13:00:00	1.37962	114.2	-4.77483	0.327752
626	2015-05-25 14:00:00	1.01807	115.9	-4.74045	0.326202
627	2015-05-25 15:00:00	1.21695	120.7	-4.71437	0.326715
628	2015-05-25 16:00:00	1.31045	125.7	-4.70563	0.327176
629	2015-05-25 17:00:00	1.77937	125.5	-4.69702	0.327833
630	2015-05-25 18:00:00	2.6722	112.9	-4.69733	0.328836
631	2015-05-25 19:00:00	3.08772	116.3	-4.6944	0.329212
632	2015-05-25 20:00:00	2.79687	110	-4.70238	0.32966
633	2015-05-25 21:00:00	4.05318	116.3	-4.71137	0.329572
634	2015-05-25 22:00:00	4.2459	117.8	-4.72193	0.329945
635	2015-05-25 23:00:00	3.44067	121.1	-4.72585	0.329925
636	2015-05-26	2.0075	131.2	-4.73908	0.329012
637	2015-05-26 01:00:00	4.0583	121.1	-4.73562	0.327537
638	2015-05-26 02:00:00	3.98185	126	-4.72682	0.327974
639	2015-05-26 03:00:00	4.41157	123.7	-4.73133	0.328784
640	2015-05-26 04:00:00	3.09225	127	-4.7267	0.328424
641	2015-05-26 05:00:00	3.78325	122.7	-4.7262	0.328274
642	2015-05-26 06:00:00	2.53308	130	-4.72397	0.327706
643	2015-05-26 07:00:00	2.35947	121.1	-4.71328	0.326986
644	2015-05-26 08:00:00	1.88007	125.7	-4.7065	0.32673
645	2015-05-26 09:00:00	1.58537	122.8	-4.68712	0.325406
646	2015-05-26 10:00:00	1.05083	164.4	-4.67265	0.325368
647	2015-05-26 11:00:00	0.383283	233.4	-4.65778	0.325502
648	2015-05-26 12:00:00	0.5801	228.5	-4.64168	0.324644
649	2015-05-26 13:00:00	0.2795	218.3	-4.62588	0.322251
650	2015-05-26 14:00:00	0.254467	110.7	-4.61977	0.312839
651	2015-05-26 15:00:00	0.717067	118.4	-4.61317	0.315811
652	2015-05-26 16:00:00	0.563633	132.1	-4.61787	0.321234
653	2015-05-26 17:00:00	0.686533	134.7	-4.61547	0.319021
654	2015-05-26 18:00:00	0.07975	225	-4.6142	0.314301
655	2015-05-26 19:00:00	0.328183	244.5	-4.61873	0.322017
656	2015-05-26 20:00:00	0.00225	225	-4.62428	0.319455
657	2015-05-26 21:00:00	0.0436833	225	-4.6306	0.319887
658	2015-05-26 22:00:00	0.07305	225	-4.63487	0.322577
659	2015-05-26 23:00:00	0.00438333	225	-4.63943	0.320122
660	2015-05-27	0.11005	225	-4.64503	0.322288
661	2015-05-27 01:00:00	0.214517	219.1	-4.64402	0.323599
662	2015-05-27 02:00:00	0.4155	45.8	-4.6479	0.322268
663	2015-05-27 03:00:00	0.424433	270.3	-4.64882	0.323793
664	2015-05-27 04:00:00	3.84007	122.1	-4.64887	0.325003
665	2015-05-27 05:00:00	4.49605	121.5	-4.64493	0.324779
666	2015-05-27 06:00:00	4.2601	126.5	-4.63375	0.32521
667	2015-05-27 07:00:00	4.03648	126.3	-4.61858	0.325304
668	2015-05-27 08:00:00	4.89153	124.4	-4.59762	0.323595
669	2015-05-27 09:00:00	3.84927	122.7	-4.58567	0.323326
670	2015-05-27 10:00:00	2.06183	117.2	-4.57307	0.322425
671	2015-05-27 11:00:00	2.18552	113.2	-4.57618	0.323492
672	2015-05-27 12:00:00	2.73502	119.5	-4.57345	0.324229
673	2015-05-27 13:00:00	0.234883	150.2	-4.56435	0.320439
674	2015-05-27 14:00:00	0.246617	225	-4.55952	0.324033
675	2015-05-27 15:00:00	0.4742	243.9	-4.55928	0.32689
676	2015-05-27 16:00:00	0.0481667	225	-4.55012	0.31467
677	2015-05-27 17:00:00	1.7256	117.5	-4.55377	0.32123
678	2015-05-27 18:00:00	2.57888	127.9	-4.5547	0.324271
679	2015-05-27 19:00:00	3.98905	115.8	-4.55378	0.324993
680	2015-05-27 20:00:00	3.69445	123	-4.55497	0.324898
681	2015-05-27 21:00:00	3.69668	128.8	-4.56248	0.324997
682	2015-05-27 22:00:00	2.79267	128.8	-4.5603	0.322647
683	2015-05-27 23:00:00	2.58988	133.3	-4.56527	0.324446
684	2015-05-28	2.55023	125.2	-4.56587	0.32633
685	2015-05-28 01:00:00	2.62555	121.4	-4.56597	0.326329
686	2015-05-28 02:00:00	3.44007	126.1	-4.56447	0.326223
687	2015-05-28 03:00:00	3.84687	121	-4.56162	0.325928
688	2015-05-28 04:00:00	3.12318	125.8	-4.55987	0.325296
689	2015-05-28 05:00:00	3.55912	122.7	-4.55565	0.32491
690	2015-05-28 06:00:00	4.59973	120.2	-4.55837	0.325417
691	2015-05-28 07:00:00	3.4469	122.7	-4.54925	0.324835
692	2015-05-28 08:00:00	2.96095	118.7	-4.53965	0.323371
693	2015-05-28 09:00:00	2.15918	152.8	-4.53263	0.322403
694	2015-05-28 10:00:00	0.2691	166.6	-4.52232	0.315819
695	2015-05-28 11:00:00	0.105183	240.5	-4.52202	0.317331
696	2015-05-28 12:00:00	0.237483	254.6	-4.52282	0.319165
697	2015-05-28 13:00:00	0.34585	331.2	-4.51023	0.315023
698	2015-05-28 14:00:00	0.553333	318.8	-4.49438	0.316835
699	2015-05-28 15:00:00	0.581	253.8	-4.50017	0.32142
700	2015-05-28 16:00:00	0.5471	288.8	-4.48418	0.317332
701	2015-05-28 17:00:00	0.836617	268.4	-4.49533	0.317704
702	2015-05-28 18:00:00	0.6709	230.9	-4.49625	0.319629
703	2015-05-28 19:00:00	1.36715	231.3	-4.506	0.322503
704	2015-05-28 20:00:00	1.75935	226.3	-4.52412	0.323145
705	2015-05-28 21:00:00	1.12012	227.4	-4.54063	0.322739
706	2015-05-28 22:00:00	1.27845	231.7	-4.53893	0.322962
707	2015-05-28 23:00:00	1.33302	211.5	-4.54382	0.324829
708	2015-05-29	0.541183	91.9	-4.54633	0.32343
709	2015-05-29 01:00:00	0.417533	223.7	-4.54535	0.326472
710	2015-05-29 02:00:00	0.677133	228.7	-4.53993	0.325213
711	2015-05-29 03:00:00	0.0725167	225	-4.53487	0.323224
712	2015-05-29 04:00:00	0.0903833	225	-4.51383	0.321571
713	2015-05-29 05:00:00	0.114	230.2	-4.49758	0.317336
714	2015-05-29 06:00:00	0.0833167	225	-4.52757	0.317171
715	2015-05-29 07:00:00	0.287233	65	-4.49957	0.30879
716	2015-05-29 08:00:00	0.188217	184.8	-4.464	0.319003
717	2015-05-29 09:00:00	0.273167	103	-4.46418	0.306744
718	2015-05-29 10:00:00	1.196	192.7	-4.4614	0.319159
719	2015-05-29 11:00:00	1.7115	238.5	-4.47833	0.321693
720	2015-05-29 12:00:00	3.26942	238.6	-4.45942	0.321933
721	2015-05-29 13:00:00	4.11448	238.7	-4.39687	0.320836
722	2015-05-29 14:00:00	2.51622	246.6	-4.43818	0.316573
723	2015-05-29 15:00:00	0.839283	211.7	-4.39292	0.310648
724	2015-05-29 16:00:00	1.60095	274.3	-3.89093	0.314237
725	2015-05-29 17:00:00	1.46755	270.8	-3.79768	0.313912
726	2015-05-29 18:00:00	0.250217	319.6	-3.99183	0.315342
727	2015-05-29 19:00:00	0.2306	3.5	-4.08018	0.308036
728	2015-05-29 20:00:00	0.397417	353.4	-4.14648	0.312323
729	2015-05-29 21:00:00	0.01425	225	-4.24135	0.313736
730	2015-05-29 22:00:00	0.0087	225	-4.23963	0.312315
731	2015-05-29 23:00:00	0.523667	324.6	-4.25735	0.31177
732	2015-05-30	0.499767	320	-4.3167	0.315579
733	2015-05-30 01:00:00	0.599583	72.5	-4.31302	0.314489
734	2015-05-30 02:00:00	0.7703	98.9	-4.29183	0.315211
735	2015-05-30 03:00:00	2.33137	119.2	-4.22495	0.316856
736	2015-05-30 04:00:00	2.25408	121.8	-4.15173	0.316747
737	2015-05-30 05:00:00	0.293867	39.3	-4.06815	0.313299
738	2015-05-30 06:00:00	0.07625	318.2	-3.89028	0.313377
739	2015-05-30 07:00:00	0.13265	196.9	-3.78017	0.307468
740	2015-05-30 08:00:00	0.174267	209.8	-3.66023	0.302289
741	2015-05-30 09:00:00	0.753517	108.3	-3.52638	0.306937
742	2015-05-30 10:00:00	1.63922	114.9	-3.4062	0.308549
743	2015-05-30 11:00:00	0.839517	138.3	-3.3402	0.30691
744	2015-05-30 12:00:00	1.10787	224.5	-3.27183	0.31108
745	2015-05-30 13:00:00	0.72905	231.6	-3.2571	0.30519
746	2015-05-30 14:00:00	0.0977833	225	-3.27445	0.302813
747	2015-05-30 15:00:00	1.05187	304.7	-3.32692	0.304446
748	2015-05-30 16:00:00	3.45475	304.1	-3.43013	0.310559
749	2015-05-30 17:00:00	4.19995	315	-3.54108	0.310201
750	2015-05-30 18:00:00	3.48613	321.3	-3.66568	0.310031
751	2015-05-30 19:00:00	1.50983	313	-3.83123	0.309421
752	2015-05-30 20:00:00	0.135717	271.9	-4.01038	0.309815
753	2015-05-30 21:00:00	0.145933	69.5	-4.10447	0.306539
754	2015-05-30 22:00:00	0.880317	116.3	-4.16403	0.3072
755	2015-05-30 23:00:00	1.5802	114.2	-4.17797	0.307494
756	2015-05-31	1.27517	145	-4.1475	0.302885
757	2015-05-31 01:00:00	3.45352	127.1	-4.1127	0.308015
758	2015-05-31 02:00:00	1.8202	149.1	-4.04998	0.305057
759	2015-05-31 03:00:00	0.9962	200.8	-3.96752	0.302799
760	2015-05-31 04:00:00	0.811667	213	-3.85397	0.302565
761	2015-05-31 05:00:00	1.59827	114.6	-3.69217	0.297237
762	2015-05-31 06:00:00	0.921117	214.9	-3.64965	0.304575
763	2015-05-31 07:00:00	1.69302	162	-3.4261	0.302947
764	2015-05-31 08:00:00	1.52878	271.3	-3.26495	0.300109
765	2015-05-31 09:00:00	0.274967	261.2	-3.10122	0.297995
766	2015-05-31 10:00:00	0.0674	297.8	-2.97513	0.28676
767	2015-05-31 11:00:00	0.9141	225.8	-2.88625	0.302927
768	2015-05-31 12:00:00	1.7562	221.7	-2.82485	0.294599
769	2015-05-31 13:00:00	2.02767	222.9	-2.83672	0.294632
770	2015-05-31 14:00:00	1.46962	223.2	-2.93573	0.294908
771	2015-05-31 15:00:00	1.24582	222.5	-3.10023	0.292121
772	2015-05-31 16:00:00	2.0619	229.6	-3.5833	0.297614
773	2015-05-31 17:00:00	1.45927	220.4	-3.2917	0.293929
774	2015-05-31 18:00:00	1.04335	235.5	-3.60125	0.295855
775	2015-05-31 19:00:00	0.490483	225	-3.73883	0.294678
776	2015-05-31 20:00:00	1.46538	111.6	-3.94888	0.296032
777	2015-05-31 21:00:00	1.75845	111.8	-4.05533	0.296635
778	2015-05-31 22:00:00	3.95723	119.8	-4.05778	0.296718
779	2015-05-31 23:00:00	3.01197	131.9	-4.05278	0.292773
780	2015-06-01	2.53577	148.2	-4.05932	0.294449
781	2015-06-01 01:00:00	1.8527	134.9	-4.05247	0.291888
782	2015-06-01 02:00:00	1.97828	137.5	-3.96503	0.29266
783	2015-06-01 03:00:00	1.08192	160.7	-3.85273	0.287711
784	2015-06-01 04:00:00	1.30603	158.4	-3.76412	0.290458
785	2015-06-01 05:00:00	2.86817	141.8	-3.57792	0.290778
786	2015-06-01 06:00:00	2.20943	138.1	-3.38507	0.289944
787	2015-06-01 07:00:00	3.77202	121.7	-3.20835	0.289908
788	2015-06-01 08:00:00	5.35107	118.8	-3.0861	0.293268
789	2015-06-01 09:00:00	4.39585	125.6	-2.9583	0.292589
790	2015-06-01 10:00:00	4.75442	129.6	-2.8257	0.292193
791	2015-06-01 11:00:00	4.0227	107.4	-2.76672	0.291774
792	2015-06-01 12:00:00	3.20528	104.6	-2.71737	0.286456
793	2015-06-01 13:00:00	2.39028	60.7	-2.70813	0.280873
794	2015-06-01 14:00:00	1.3515	67.6	-2.76555	0.283856
795	2015-06-01 15:00:00	2.40532	115	-2.8191	0.279998
796	2015-06-01 16:00:00	2.67748	105.9	-2.95757	0.284959
797	2015-06-01 17:00:00	2.36935	112.5	-3.12157	0.2842
798	2015-06-01 18:00:00	0.67835	86.5	-3.27037	0.274286
799	2015-06-01 19:00:00	4.76268	115.4	-3.46155	0.280263
800	2015-06-01 20:00:00	6.15667	127.3	-3.67352	0.285475
801	2015-06-01 21:00:00	5.7541	120.6	-4.0058	0.283473
802	2015-06-01 22:00:00	3.80125	142.6	-3.96008	0.283085
803	2015-06-01 23:00:00	4.63585	155.4	-4.27358	0.284334
804	2015-06-02	2.88578	141.3	-4.3523	0.283723
805	2015-06-02 01:00:00	4.22852	131.2	-4.05997	0.283499
806	2015-06-02 02:00:00	1.71772	176.8	-4.02265	0.282106
807	2015-06-02 03:00:00	3.47872	141.4	-4.18107	0.283574
808	2015-06-02 04:00:00	2.11463	162.7	-3.7544	0.280978
809	2015-06-02 05:00:00	1.33972	188.5	-3.31112	0.278694
810	2015-06-02 06:00:00	1.41962	104.3	-3.17035	0.275825
811	2015-06-02 07:00:00	0.729933	150.3	-3.00368	0.275495
812	2015-06-02 08:00:00	0.930783	261.4	-2.85552	0.27154
813	2015-06-02 09:00:00	0.998317	225.1	-2.70657	0.261648
814	2015-06-02 10:00:00	6.7101	117.7	-2.657	0.261798
815	2015-06-02 11:00:00	9.68663	122.8	-2.67115	0.255426
816	2015-06-02 12:00:00	9.21163	117.6	-2.5912	0.247772
817	2015-06-02 13:00:00	7.63903	109.8	-2.52288	0.243821
818	2015-06-02 14:00:00	5.81235	100.3	-2.53222	0.240065
819	2015-06-02 15:00:00	6.30567	114	-2.58398	0.241706
820	2015-06-02 16:00:00	5.37782	107	-2.68257	0.239461
821	2015-06-02 17:00:00	2.94515	48	-2.78208	0.236135
822	2015-06-02 18:00:00	3.4397	112.4	-2.99385	0.236043
823	2015-06-02 19:00:00	5.0341	119.3	-3.43868	0.239896
824	2015-06-02 20:00:00	5.31055	125.9	-3.85285	0.241483
825	2015-06-02 21:00:00	5.53427	122.5	-4.07613	0.241602
826	2015-06-02 22:00:00	3.35787	113.8	-4.26412	0.241997
827	2015-06-02 23:00:00	1.66575	44.2	-4.32563	0.241189
828	2015-06-03	3.35187	314.1	-4.21317	0.241667
829	2015-06-03 01:00:00	2.24275	312.6	-3.97472	0.240747
830	2015-06-03 02:00:00	2.75365	341.4	-3.9663	0.239173
831	2015-06-03 03:00:00	7.03893	326.5	-4.02442	0.238499
832	2015-06-03 04:00:00	9.19275	326.5	-3.95313	0.23875
833	2015-06-03 05:00:00	1.91895	65.6	-3.86127	0.239392
834	2015-06-03 06:00:00	3.01757	276.8	-3.38877	0.239145
835	2015-06-03 07:00:00	7.14435	323.1	-2.61135	0.236549
836	2015-06-03 08:00:00	7.40795	335.8	-2.53465	0.232011
837	2015-06-03 09:00:00	8.8506	337.7	-2.77905	0.229447
838	2015-06-03 10:00:00	11.176	334.4	-2.14868	0.228789
839	2015-06-03 11:00:00	9.47228	326.7	-2.54087	0.222999
840	2015-06-03 12:00:00	7.84255	321.4	-3.13423	0.221106
841	2015-06-03 13:00:00	8.54938	334.6	-2.69355	0.217395
842	2015-06-03 14:00:00	9.19597	353.3	-2.6398	0.216842
843	2015-06-03 15:00:00	9.20358	343.3	-2.8071	0.217224
844	2015-06-03 16:00:00	7.37638	14.8	-2.96197	0.2139
845	2015-06-03 17:00:00	6.25247	119.2	-2.90042	0.209611
846	2015-06-03 18:00:00	6.90527	9.5	-3.48672	0.210049
847	2015-06-03 19:00:00	11.0948	346	-3.86597	0.213067
848	2015-06-03 20:00:00	9.73023	338.7	-3.89968	0.212898
849	2015-06-03 21:00:00	7.6705	338.6	-3.99803	0.212395
850	2015-06-03 22:00:00	7.85012	341.9	-4.07392	0.212022
851	2015-06-03 23:00:00	10.0198	0.3	-4.13272	0.211429
852	2015-06-04	11.8937	348	-4.31248	0.211916
853	2015-06-04 01:00:00	10.9888	345.5	-4.33107	0.214364
854	2015-06-04 02:00:00	11.485	346.4	-4.2573	0.215887
855	2015-06-04 03:00:00	11.4173	340.4	-4.10018	0.217815
856	2015-06-04 04:00:00	10.3865	332.1	-3.98688	0.218628
857	2015-06-04 05:00:00	11.6235	330.4	-3.89263	0.216999
858	2015-06-04 06:00:00	11.366	344.2	-3.83852	0.217698
859	2015-06-04 07:00:00	10.0008	336.1	-3.44522	0.217979
860	2015-06-04 08:00:00	8.7908	331.3	-3.16277	0.217724
861	2015-06-04 09:00:00	10.1806	342.1	-3.03953	0.216568
862	2015-06-04 10:00:00	10.8407	343.7	-3.11778	0.216181
863	2015-06-04 11:00:00	10.5345	339.6	-2.77677	0.215616
864	2015-06-04 12:00:00	9.488	333.9	-2.33792	0.215639
865	2015-06-04 13:00:00	9.8735	335.1	-2.5092	0.215793
866	2015-06-04 14:00:00	9.6805	343.9	-2.67037	0.21422
867	2015-06-04 15:00:00	9.55037	344.4	-3.16858	0.212506
868	2015-06-04 16:00:00	10.0035	344.8	-3.44003	0.211673
869	2015-06-04 17:00:00	10.1493	343.7	-3.59185	0.210758
870	2015-06-04 18:00:00	8.3754	337.1	-3.59043	0.211464
871	2015-06-04 19:00:00	7.94742	327.9	-3.63823	0.209859
872	2015-06-04 20:00:00	9.72883	343.5	-3.57743	0.207729
873	2015-06-04 21:00:00	9.30575	340.1	-3.43117	0.206926
874	2015-06-04 22:00:00	9.16785	338	-3.68377	0.206263
875	2015-06-04 23:00:00	9.6435	334.4	-3.76222	0.205193
876	2015-06-05	8.797	332.3	-4.11332	0.205665
877	2015-06-05 01:00:00	8.4076	327.5	-3.98513	0.204181
878	2015-06-05 02:00:00	9.29733	324.6	-3.71132	0.20221
879	2015-06-05 03:00:00	8.44367	325.4	-3.88472	0.201335
880	2015-06-05 04:00:00	7.9192	324.6	-4.02863	0.201008
881	2015-06-05 05:00:00	8.41128	325	-3.63967	0.199325
882	2015-06-05 06:00:00	8.76533	322.6	-3.05958	0.19766
883	2015-06-05 07:00:00	9.0235	331.2	-2.81815	0.195888
884	2015-06-05 08:00:00	8.70677	328.6	-2.76353	0.192299
885	2015-06-05 09:00:00	9.0125	328.8	-2.60913	0.189132
886	2015-06-05 10:00:00	8.86258	329.8	-2.65763	0.189793
887	2015-06-05 11:00:00	8.33908	330.5	-2.6061	0.192408
888	2015-06-05 12:00:00	8.33848	320.5	-2.40085	0.190226
889	2015-06-05 13:00:00	8.02187	323.8	-2.78692	0.191614
890	2015-06-05 14:00:00	7.0553	323.1	-2.87268	0.189529
891	2015-06-05 15:00:00	8.2681	323.4	-2.8776	0.184082
892	2015-06-05 16:00:00	7.80463	354.1	-3.24332	0.185592
893	2015-06-05 17:00:00	8.70875	351.2	-3.17288	0.188166
894	2015-06-05 18:00:00	8.9605	340.9	-3.20325	0.185881
895	2015-06-05 19:00:00	8.99715	337.8	-3.39263	0.184985
896	2015-06-05 20:00:00	7.908	336.9	-3.46708	0.184367
897	2015-06-05 21:00:00	7.9365	340	-3.80772	0.184179
898	2015-06-05 22:00:00	7.19117	331.6	-4.04527	0.184558
899	2015-06-05 23:00:00	7.398	319.1	-4.03547	0.184267
900	2015-06-06	7.49942	320.8	-3.90633	0.184317
901	2015-06-06 01:00:00	6.99023	324.7	-3.90533	0.184575
902	2015-06-06 02:00:00	6.87483	327.1	-3.76157	0.185061
903	2015-06-06 03:00:00	7.12038	321.1	-3.6998	0.184563
904	2015-06-06 04:00:00	6.56315	319.4	-3.29167	0.183992
905	2015-06-06 05:00:00	7.47198	316.9	-3.17187	0.18339
906	2015-06-06 06:00:00	6.56028	319.2	-3.23152	0.185039
907	2015-06-06 07:00:00	6.86583	317.5	-2.94227	0.184881
908	2015-06-06 08:00:00	7.7402	320.6	-2.47558	0.182245
909	2015-06-06 09:00:00	7.28472	316.7	-2.66367	0.180027
910	2015-06-06 10:00:00	7.1661	310.2	-2.31687	0.178759
911	2015-06-06 11:00:00	7.2113	313.1	-2.42888	0.177063
912	2015-06-06 12:00:00	7.62575	311.8	-2.37712	0.174405
913	2015-06-06 13:00:00	7.90227	309.1	-2.53573	0.172489
914	2015-06-06 14:00:00	8.1611	311.2	-2.15695	0.167772
915	2015-06-06 15:00:00	8.33972	308	-2.93075	0.165502
916	2015-06-06 16:00:00	7.57963	307.5	-3.06727	0.166524
917	2015-06-06 17:00:00	7.23535	307.9	-3.21623	0.166997
918	2015-06-06 18:00:00	6.0168	297.1	-2.92793	0.166597
919	2015-06-06 19:00:00	5.72923	292.7	-2.626	0.165288
920	2015-06-06 20:00:00	6.38528	302.6	-3.75622	0.166596
921	2015-06-06 21:00:00	4.70142	295	-3.76923	0.166129
922	2015-06-06 22:00:00	3.5044	277	-3.93802	0.165562
923	2015-06-06 23:00:00	3.28643	277.8	-4.28537	0.165395
924	2015-06-07	3.30805	322.7	-4.35518	0.166299
925	2015-06-07 01:00:00	4.06247	317.5	-4.05365	0.166578
926	2015-06-07 02:00:00	1.59093	324.3	-3.7556	0.16421
927	2015-06-07 03:00:00	2.27188	332.3	-3.66773	0.166804
928	2015-06-07 04:00:00	0.7026	334.9	-2.97242	0.162138
929	2015-06-07 05:00:00	1.27912	241.5	-2.57957	0.163131
930	2015-06-07 06:00:00	2.09668	141.2	-2.02765	0.161504
931	2015-06-07 07:00:00	1.37182	157	-1.84205	0.159372
932	2015-06-07 08:00:00	1.34057	172.2	-1.72998	0.157121
933	2015-06-07 09:00:00	0.750917	187.5	-1.56062	0.158098
934	2015-06-07 10:00:00	0.9635	214	-1.38835	0.158743
935	2015-06-07 11:00:00	0.938817	142.1	-1.08967	0.151647
936	2015-06-07 12:00:00	1.2144	214.5	-1.1345	0.149732
937	2015-06-07 13:00:00	2.6791	165.1	-1.31318	0.149528
938	2015-06-07 14:00:00	6.63308	207.5	-2.39857	0.153199
939	2015-06-07 15:00:00	6.24645	205.9	-2.45572	0.153163
940	2015-06-07 16:00:00	6.30865	215.9	-2.5861	0.15365
941	2015-06-07 17:00:00	4.7182	212.6	-2.52812	0.154837
942	2015-06-07 18:00:00	6.22927	218.5	-2.7419	0.154013
943	2015-06-07 19:00:00	6.03687	220.8	-2.87537	0.154135
944	2015-06-07 20:00:00	5.23827	207.3	-2.83055	0.153338
945	2015-06-07 21:00:00	4.24865	201.5	-3.30828	0.150596
946	2015-06-07 22:00:00	4.90255	206.6	-3.66702	0.150247
947	2015-06-07 23:00:00	5.5062	203	-3.74703	0.149283
948	2015-06-08	4.30945	187.4	-3.72607	0.148416
949	2015-06-08 01:00:00	3.70775	192.9	-3.6742	0.146709
950	2015-06-08 02:00:00	3.82048	187.7	-3.63857	0.145483
951	2015-06-08 03:00:00	4.29597	176.3	-3.30032	0.143652
952	2015-06-08 04:00:00	3.8717	170.8	-2.6667	0.140746
953	2015-06-08 05:00:00	4.06972	200.3	-2.80472	0.14492
954	2015-06-08 06:00:00	3.44462	194.9	-2.79547	0.149505
955	2015-06-08 07:00:00	2.47153	190.4	-2.10128	0.144829
956	2015-06-08 08:00:00	3.07428	180.4	-1.63533	0.140573
957	2015-06-08 09:00:00	4.44323	144.2	-1.44372	0.139461
958	2015-06-08 10:00:00	3.10348	179.3	-1.35448	0.137399
959	2015-06-08 11:00:00	3.38777	184.5	-1.56467	0.130134
960	2015-06-08 12:00:00	5.14653	202.7	-2.00342	0.131407
961	2015-06-08 13:00:00	5.33308	208.3	-1.58635	0.128374
962	2015-06-08 14:00:00	5.18288	211	-1.35058	0.126555
963	2015-06-08 15:00:00	5.18763	212	-2.07837	0.120014
964	2015-06-08 16:00:00	4.8091	204.8	-2.08195	0.116877
965	2015-06-08 17:00:00	5.00922	214.8	-1.96097	0.116212
966	2015-06-08 18:00:00	5.66577	214.6	-2.80523	0.117121
967	2015-06-08 19:00:00	5.42023	213.1	-2.55133	0.118443
968	2015-06-08 20:00:00	5.42913	210.2	-2.05263	0.121652
969	2015-06-08 21:00:00	5.02363	213.3	-2.61358	0.122434
970	2015-06-08 22:00:00	4.3402	218.4	-1.50732	0.121092
971	2015-06-08 23:00:00	1.75753	181.6	-1.25602	0.113929
972	2015-06-09	1.29632	69.5	-1.96727	0.108877
973	2015-06-09 01:00:00	1.60513	128.9	-1.5531	0.105656
974	2015-06-09 02:00:00	3.76353	112.7	-0.7062	0.105701
975	2015-06-09 03:00:00	3.45563	108.7	-2.49922	0.111695
976	2015-06-09 04:00:00	4.0234	101.1	-2.37618	0.106587
977	2015-06-09 05:00:00	4.55665	97	-1.7707	0.109993
978	2015-06-09 06:00:00	4.67373	90.8	-1.72453	0.111063
979	2015-06-09 07:00:00	4.07232	77.1	-2.311	0.109715
980	2015-06-09 08:00:00	3.08773	67.3	-1.84798	0.101959
981	2015-06-09 09:00:00	2.36847	76.2	-1.47578	0.102553
982	2015-06-09 10:00:00	0.324667	100.8	0.563167	0.0845321
983	2015-06-09 11:00:00	0.109617	293.8	0.965417	0.0971799
984	2015-06-09 12:00:00	0.456933	260.1	0.498383	0.0988998
985	2015-06-09 13:00:00	0.60715	282.8	0.46115	0.0980514
986	2015-06-09 14:00:00	2.97855	334.4	-0.5551	0.0966491
987	2015-06-09 15:00:00	4.849	331.3	-2.62477	0.0980082
988	2015-06-09 16:00:00	4.77648	321.3	-2.34482	0.097828
989	2015-06-09 17:00:00	4.96918	319.1	-2.52292	0.0982667
990	2015-06-09 18:00:00	4.49578	308.4	-2.90543	0.0972259
991	2015-06-09 19:00:00	4.03415	296.4	-2.82445	0.0977154
992	2015-06-09 20:00:00	0.954217	241	-2.74187	0.0976072
993	2015-06-09 21:00:00	0.696633	193	-2.39058	0.0962202
994	2015-06-09 22:00:00	0.92105	330.3	-1.9976	0.0949138
995	2015-06-09 23:00:00	0.377767	306.9	-2.1055	0.0950643
996	2015-06-10	0.51375	274.8	-2.76182	0.0969187
997	2015-06-10 01:00:00	1.49093	355.3	-3.0066	0.0967025
998	2015-06-10 02:00:00	1.39757	89.5	-0.0587833	0.0911941
999	2015-06-10 03:00:00	0.260167	342.6	0.345333	0.0941832
1000	2015-06-10 04:00:00	0.493233	8.4	-1.35735	0.0957779
1001	2015-06-10 05:00:00	2.58653	108.7	-1.97408	0.0956407
1002	2015-06-10 06:00:00	2.78802	129.7	-1.9083	0.0958546
1003	2015-06-10 07:00:00	0.58635	138.8	-0.2674	0.0951176
1004	2015-06-10 08:00:00	1.20317	211.5	0.2626	0.0939269
1005	2015-06-10 09:00:00	0.427033	215.9	1.31853	0.0920201
1006	2015-06-10 10:00:00	0.771267	131.3	2.88982	0.0899369
1007	2015-06-10 11:00:00	0.186217	335.4	4.14143	0.0875388
1008	2015-06-10 12:00:00	0.385867	13.5	5.58558	0.0804746
1009	2015-06-10 13:00:00	0.921883	42.2	4.98738	0.0781022
1010	2015-06-10 14:00:00	2.82853	114.8	2.64183	0.0880786
1011	2015-06-10 15:00:00	6.40587	127.9	-0.00406667	0.0907765
1012	2015-06-10 16:00:00	5.3495	121.4	1.29045	0.0905435
1013	2015-06-10 17:00:00	3.93852	117.4	2.31175	0.0888081
1014	2015-06-10 18:00:00	4.06142	119.8	-1.31	0.0903734
1015	2015-06-10 19:00:00	4.2567	123.3	-0.928533	0.0901514
1016	2015-06-10 20:00:00	3.92323	120.7	-0.9596	0.0895734
1017	2015-06-10 21:00:00	3.89867	122.7	-1.44395	0.0887157
1018	2015-06-10 22:00:00	4.10743	131.4	-2.133	0.089947
1019	2015-06-10 23:00:00	2.5627	113.2	-2.08818	0.0891683
1020	2015-06-11	1.70885	74.3	-1.90653	0.0865501
1021	2015-06-11 01:00:00	1.94825	105.9	-2.12117	0.0871563
1022	2015-06-11 02:00:00	5.66467	118.5	-1.55583	0.0881362
1023	2015-06-11 03:00:00	5.80573	111.8	-1.2989	0.088542
1024	2015-06-11 04:00:00	7.22333	112	-1.90642	0.0889971
1025	2015-06-11 05:00:00	5.61652	102.6	-0.392133	0.089153
1026	2015-06-11 06:00:00	2.3715	97.2	1.34218	0.0850143
1027	2015-06-11 07:00:00	3.47865	113.8	-1.38018	0.0893372
1028	2015-06-11 08:00:00	1.71263	3.8	0.708117	0.0872292
1029	2015-06-11 09:00:00	2.47682	317.8	1.02577	0.0872826
1030	2015-06-11 10:00:00	3.72833	319.2	1.43957	0.0881492
1031	2015-06-11 11:00:00	1.81608	351.6	1.6769	0.0859839
1032	2015-06-11 12:00:00	5.61768	107.1	0.309333	0.0840717
1033	2015-06-11 13:00:00	6.23382	68.9	-1.49183	0.0872795
1034	2015-06-11 14:00:00	9.11947	4.3	-2.18473	0.0849691
1035	2015-06-11 15:00:00	11.1192	3.9	-2.6056	0.0843307
1036	2015-06-11 16:00:00	11.6205	4	-3.11508	0.084408
1037	2015-06-11 17:00:00	11.3458	349.7	-3.16827	0.0850123
1038	2015-06-11 18:00:00	10.6257	345.1	-3.0458	0.085546
1039	2015-06-11 19:00:00	12.8918	347.3	-3.25602	0.083422
1040	2015-06-11 20:00:00	13.4325	343.9	-3.55772	0.0822577
1041	2015-06-11 21:00:00	15.3048	344.5	-3.64188	0.0810273
1042	2015-06-11 22:00:00	13.6607	347.1	-3.37452	0.0826766
1043	2015-06-11 23:00:00	8.77435	32.2	-2.6389	0.085968
1044	2015-06-12	11.5846	112.3	-2.67765	0.084844
1045	2015-06-12 01:00:00	9.87515	104.7	-2.52005	0.0853683
1046	2015-06-12 02:00:00	9.64422	114.2	-2.5176	0.0860286
1047	2015-06-12 03:00:00	7.98083	78.5	-2.01742	0.0859005
1048	2015-06-12 04:00:00	3.7801	65.5	-1.46582	0.0859304
1049	2015-06-12 05:00:00	7.03458	44.1	-1.41253	0.085755
1050	2015-06-12 06:00:00	9.48335	27	-2.59873	0.0841263
1051	2015-06-12 07:00:00	10.3243	349.3	-3.12895	0.0846491
1052	2015-06-12 08:00:00	12.6208	357.2	-2.97545	0.082414
1053	2015-06-12 09:00:00	11.6437	345.8	-2.57025	0.083978
1054	2015-06-12 10:00:00	9.38433	357.1	-1.91557	0.0851461
1055	2015-06-12 11:00:00	7.68372	12.2	-1.3987	0.0853372
1056	2015-06-12 12:00:00	4.45405	28.2	-0.22935	0.0855964
1057	2015-06-12 13:00:00	7.45003	22.6	-0.288717	0.0835643
1058	2015-06-12 14:00:00	8.6749	357.2	-0.27795	0.0839516
1059	2015-06-12 15:00:00	7.48718	17.6	0.244467	0.0835643
1060	2015-06-12 16:00:00	7.33242	9.9	0.155667	0.0828517
1061	2015-06-12 17:00:00	11.773	348.9	-0.48715	0.0812986
1062	2015-06-12 18:00:00	12.7237	348.5	-1.75728	0.0809634
1063	2015-06-12 19:00:00	12.4525	359.1	-1.64005	0.0802924
1064	2015-06-12 20:00:00	11.1578	2.7	-1.64987	0.0817122
1065	2015-06-12 21:00:00	11.0063	20.9	-0.933217	0.0802176
1066	2015-06-12 22:00:00	11.4233	31.1	-0.857733	0.080081
1067	2015-06-12 23:00:00	12.7698	41.3	-0.570267	0.0794274
1068	2015-06-13	5.22607	74.5	-1.72075	0.0831313
1069	2015-06-13 01:00:00	6.09273	101	-2.39783	0.0837906
1070	2015-06-13 02:00:00	6.478	98.2	-2.25267	0.0839505
1071	2015-06-13 03:00:00	9.63835	105.4	-2.09427	0.082585
1072	2015-06-13 04:00:00	7.25807	97.2	-0.75775	0.0830412
1073	2015-06-13 05:00:00	6.08015	114.5	0.0391333	0.0829328
1074	2015-06-13 06:00:00	5.20708	117.1	-1.09008	0.0837282
1075	2015-06-13 07:00:00	3.42793	95	0.1297	0.0839605
1076	2015-06-13 08:00:00	4.05648	84.3	0.856733	0.0818633
1077	2015-06-13 09:00:00	2.8807	2.9	3.78013	0.0817278
1078	2015-06-13 10:00:00	2.84902	0.9	4.00175	0.0816934
1079	2015-06-13 11:00:00	4.8372	327.3	1.51017	0.0805896
1080	2015-06-13 12:00:00	3.08313	343.2	1.70327	0.080679
1081	2015-06-13 13:00:00	5.99395	323.7	1.00565	0.0784978
1082	2015-06-13 14:00:00	6.44915	335.5	1.54813	0.0794949
1083	2015-06-13 15:00:00	3.57025	76.9	3.96852	0.0779787
1084	2015-06-13 16:00:00	5.36887	327.5	2.46698	0.0789247
1085	2015-06-13 17:00:00	4.99613	111.3	1.17728	0.0798984
1086	2015-06-13 18:00:00	9.25337	125.1	-0.5629	0.0785972
1087	2015-06-13 19:00:00	6.35837	110.4	-0.623283	0.0794136
1088	2015-06-13 20:00:00	6.20937	113.9	-0.97445	0.0785599
1089	2015-06-13 21:00:00	6.41745	106.2	-1.55972	0.0790537
1090	2015-06-13 22:00:00	6.0025	89.2	-1.15877	0.0775216
1091	2015-06-13 23:00:00	5.23945	112	-1.42838	0.0784224
1092	2015-06-14	5.42858	126.9	-1.343	0.0783168
1093	2015-06-14 01:00:00	8.66772	129.9	-1.40773	0.0774504
1094	2015-06-14 02:00:00	7.11885	130.8	-1.31815	0.0772171
1095	2015-06-14 03:00:00	6.15523	128.2	-1.29735	0.0777606
1096	2015-06-14 04:00:00	6.01445	114.6	-0.0539667	0.0775271
1097	2015-06-14 05:00:00	7.46902	125.1	0.312083	0.0767841
1098	2015-06-14 06:00:00	7.96158	126.5	1.02298	0.076725
1099	2015-06-14 07:00:00	8.72892	123.6	0.91015	0.0762225
1100	2015-06-14 08:00:00	8.66155	125.3	1.20492	0.0756827
1101	2015-06-14 09:00:00	6.2825	125.9	1.77782	0.0762191
1102	2015-06-14 10:00:00	7.13268	116.5	1.89892	0.0767899
1103	2015-06-14 11:00:00	5.78918	109.9	2.48738	0.0770824
1104	2015-06-14 12:00:00	5.70017	112.3	2.89023	0.0761827
1105	2015-06-14 13:00:00	5.75302	107.4	1.98712	0.0750362
1106	2015-06-14 14:00:00	6.66798	96.4	2.78732	0.0747387
1107	2015-06-14 15:00:00	6.67402	88.5	2.70908	0.0739508
1108	2015-06-14 16:00:00	11.0038	101.9	2.03795	0.0722361
1109	2015-06-14 17:00:00	13.3762	107	1.68113	0.0691728
1110	2015-06-14 18:00:00	11.8468	111.6	0.89175	0.0700896
1111	2015-06-14 19:00:00	10.9893	112.1	0.0941333	0.0703689
1112	2015-06-14 20:00:00	10.69	112.8	0.0196667	0.0696804
1113	2015-06-14 21:00:00	8.11113	108	-0.6903	0.0703723
1114	2015-06-14 22:00:00	4.78412	103.9	-0.950933	0.0706875
1115	2015-06-14 23:00:00	6.65227	101.3	-0.834	0.0701415
1116	2015-06-15	5.8733	117.5	-0.686233	0.069818
1117	2015-06-15 01:00:00	4.54627	119	-0.6895	0.0697557
1118	2015-06-15 02:00:00	4.53053	113.8	-0.688683	0.0693721
1119	2015-06-15 03:00:00	5.87073	125.7	-0.586233	0.0689546
1120	2015-06-15 04:00:00	3.61962	111.5	-0.624433	0.0696162
1121	2015-06-15 05:00:00	2.31308	107.8	0.263483	0.0691038
1122	2015-06-15 06:00:00	3.37653	122.9	0.18855	0.0680592
1123	2015-06-15 07:00:00	3.66428	126.1	0.296583	0.0686415
1124	2015-06-15 08:00:00	4.59427	122.7	0.7427	0.0680151
1125	2015-06-15 09:00:00	4.61122	114.8	0.9123	0.0679515
1126	2015-06-15 10:00:00	4.03682	132	2.58043	0.0668727
1127	2015-06-15 11:00:00	5.13435	129.4	2.11025	0.0672041
1128	2015-06-15 12:00:00	4.27272	124.7	4.63553	0.0666391
1129	2015-06-15 13:00:00	3.85252	130.4	5.45693	0.0658244
1130	2015-06-15 14:00:00	2.75592	155.3	6.42975	0.064029
1131	2015-06-15 15:00:00	1.04935	206	7.12393	0.0609875
1132	2015-06-15 16:00:00	0.908717	288.6	7.13292	0.0618443
1133	2015-06-15 17:00:00	1.04592	249.9	6.69167	0.0611057
1134	2015-06-15 18:00:00	0.704233	237.8	4.31888	0.0602917
1135	2015-06-15 19:00:00	0.4485	106.2	4.22113	0.0593296
1136	2015-06-15 20:00:00	0.554583	196.1	3.61105	0.0596047
1137	2015-06-15 21:00:00	0.686	21.9	2.08382	0.059983
1138	2015-06-15 22:00:00	0.98825	267.7	1.9017	0.0582674
1139	2015-06-15 23:00:00	1.67337	68.6	0.558267	0.0595753
1140	2015-06-16	1.935	87.2	-0.0876	0.0605628
1141	2015-06-16 01:00:00	0.389483	195.7	0.291517	0.0596264
1142	2015-06-16 02:00:00	1.48127	234.7	-0.3501	0.0601142
1143	2015-06-16 03:00:00	0.186867	225	0.64335	0.0594661
1144	2015-06-16 04:00:00	0.504767	91.2	2.42065	0.0578569
1145	2015-06-16 05:00:00	1.69498	236.6	2.03427	0.060528
1146	2015-06-16 06:00:00	1.14817	326.9	2.24265	0.0582092
1147	2015-06-16 07:00:00	1.2136	277.6	1.97238	0.0600852
1148	2015-06-16 08:00:00	1.26547	311	2.98007	0.0591722
1149	2015-06-16 09:00:00	0.6661	279	3.64428	0.0586389
1150	2015-06-16 10:00:00	0.818283	282	2.2534	0.0594879
1151	2015-06-16 11:00:00	0.563033	301	3.03927	0.0583648
1152	2015-06-16 12:00:00	0.82145	279.7	2.66497	0.0590642
1153	2015-06-16 13:00:00	0.69195	277.8	4.55515	0.0587961
1154	2015-06-16 14:00:00	1.46757	313.5	5.9059	0.0568506
1155	2015-06-16 15:00:00	1.08537	352.2	6.95758	0.054174
1156	2015-06-16 16:00:00	0.894067	124.4	6.12783	0.056591
1157	2015-06-16 17:00:00	2.9421	111.8	4.11233	0.0571497
1158	2015-06-16 18:00:00	3.39057	118.6	2.81925	0.0582536
1159	2015-06-16 19:00:00	1.79478	106.1	1.59542	0.0596452
1160	2015-06-16 20:00:00	2.63405	0.4	0.146517	0.0592068
1161	2015-06-16 21:00:00	2.63728	326	-0.88535	0.0598058
1162	2015-06-16 22:00:00	5.26222	327.2	-2.0174	0.0598813
1163	2015-06-16 23:00:00	4.96993	327.1	-2.1242	0.0601374
1164	2015-06-17	4.6189	326.3	-1.98607	0.0606974
1165	2015-06-17 01:00:00	3.2913	327.7	-2.1461	0.0601845
1166	2015-06-17 02:00:00	1.88842	330.2	-1.89573	0.0604689
1167	2015-06-17 03:00:00	1.13353	304.7	-1.6167	0.0605148
1168	2015-06-17 04:00:00	0.909933	325.4	-1.16605	0.0594714
1169	2015-06-17 05:00:00	0.71895	300.9	-0.829133	0.060364
1170	2015-06-17 06:00:00	0.5273	312.3	0.731067	0.0582567
1171	2015-06-17 07:00:00	1.99383	317.1	1.4393	0.0593668
1172	2015-06-17 08:00:00	1.75722	312.1	1.8304	0.0597638
1173	2015-06-17 09:00:00	1.19495	250	1.92753	0.0596503
1174	2015-06-17 10:00:00	0.5796	296.2	3.3752	0.0581308
1175	2015-06-17 11:00:00	1.13242	279.8	2.41712	0.0588941
1176	2015-06-17 12:00:00	2.00503	309.4	1.94385	0.0586914
1177	2015-06-17 13:00:00	2.29625	313.1	1.00438	0.0593058
1178	2015-06-17 14:00:00	3.92935	316.6	-0.0760333	0.058321
1179	2015-06-17 15:00:00	2.11615	277.2	1.25197	0.0599031
1180	2015-06-17 16:00:00	3.06945	309.1	0.6927	0.0588912
1181	2015-06-17 17:00:00	3.25003	310.8	0.207117	0.0589351
1182	2015-06-17 18:00:00	3.15067	303	-0.326333	0.0590906
1183	2015-06-17 19:00:00	4.01175	314.6	-0.757467	0.0590551
1184	2015-06-17 20:00:00	1.61863	290.4	-0.594383	0.0588478
1185	2015-06-17 21:00:00	1.18707	292.6	-0.604	0.0584463
1186	2015-06-17 22:00:00	2.70358	320.6	-0.696667	0.058659
1187	2015-06-17 23:00:00	5.05527	322.4	-1.53528	0.0586361
1188	2015-06-18	3.85085	319.9	-1.39058	0.0590108
1189	2015-06-18 01:00:00	0.621633	323	-0.437683	0.0578948
1190	2015-06-18 02:00:00	0.0940333	193.2	-0.406383	0.0577856
1191	2015-06-18 03:00:00	0.6297	243.6	-0.648417	0.0587164
1192	2015-06-18 04:00:00	0.410783	236.8	-0.11	0.0586198
1193	2015-06-18 05:00:00	0.753083	231.7	0.420367	0.0589195
1194	2015-06-18 06:00:00	0.0997	276.5	1.69608	0.056599
1195	2015-06-18 07:00:00	1.01942	345.8	2.32967	0.0564735
1196	2015-06-18 08:00:00	0.92765	264.2	2.35625	0.0587308
1197	2015-06-18 09:00:00	1.10733	257.2	3.12512	0.0585389
1198	2015-06-18 10:00:00	3.4411	318.8	2.78215	0.0574668
1199	2015-06-18 11:00:00	2.95802	305.7	2.92	0.0578104
1200	2015-06-18 12:00:00	5.4368	311.5	1.69848	0.0578502
1201	2015-06-18 13:00:00	6.42938	324	1.14005	0.058056
1202	2015-06-18 14:00:00	6.54095	320.9	0.26265	0.0581169
1203	2015-06-18 15:00:00	4.80958	314.2	1.24155	0.0581559
1204	2015-06-18 16:00:00	3.35483	283.3	1.58402	0.0574888
1205	2015-06-18 17:00:00	4.69097	324.2	2.87133	0.0575644
1206	2015-06-18 18:00:00	2.87988	309.2	2.22325	0.0572348
1207	2015-06-18 19:00:00	3.28517	265.8	-0.0378167	0.057176
1208	2015-06-18 20:00:00	2.43043	315.3	-0.47365	0.0584372
1209	2015-06-18 21:00:00	1.57915	338.6	-0.435967	0.0585515
1210	2015-06-18 22:00:00	3.04838	330.1	-1.354	0.0578352
1211	2015-06-18 23:00:00	4.5407	322.9	-2.06877	0.0585895
1212	2015-06-19	0.996733	257.6	-1.57607	0.0587276
1213	2015-06-19 01:00:00	0.907383	219.6	-1.31508	0.0586682
1214	2015-06-19 02:00:00	0.373583	112.7	-0.845167	0.0573161
1215	2015-06-19 03:00:00	0.192017	225	-0.609083	0.0573845
1216	2015-06-19 04:00:00	0.7497	225.1	-0.4941	0.0579806
1217	2015-06-19 05:00:00	0.7452	248.6	0.210167	0.0585193
1218	2015-06-19 06:00:00	0.530483	251.5	0.553767	0.057877
1219	2015-06-19 07:00:00	0.783683	232.8	0.8109	0.0585102
1220	2015-06-19 08:00:00	0.40225	223.1	1.10308	0.0573278
1221	2015-06-19 09:00:00	1.83897	344.3	1.3309	0.0574942
1222	2015-06-19 10:00:00	1.99882	316.2	1.04582	0.057964
1223	2015-06-19 11:00:00	0.772233	299.2	1.10102	0.0577351
1224	2015-06-19 12:00:00	1.17607	322.3	2.44643	0.0567874
1225	2015-06-19 13:00:00	1.29878	313.7	1.93508	0.0573565
1226	2015-06-19 14:00:00	2.5831	326.5	1.56073	0.057997
1227	2015-06-19 15:00:00	2.93527	331.1	1.5101	0.0583672
1228	2015-06-19 16:00:00	3.27082	335.6	1.29165	0.0586222
1229	2015-06-19 17:00:00	3.13293	326.1	0.407483	0.0581203
1230	2015-06-19 18:00:00	2.59227	329.2	0.0745833	0.0582393
1231	2015-06-19 19:00:00	1.60028	337.1	0.00963333	0.0583049
1232	2015-06-19 20:00:00	0.190417	330.3	-0.0523	0.0568223
1233	2015-06-19 21:00:00	0.1598	308.3	-0.5895	0.0566186
1234	2015-06-19 22:00:00	0.310183	256.5	-0.795217	0.0575517
1235	2015-06-19 23:00:00	0.195567	248.2	-0.8568	0.0575546
1236	2015-06-20	0.566333	263.7	-0.9004	0.0570963
1237	2015-06-20 01:00:00	0.2279	223.6	-0.8414	0.0586255
1238	2015-06-20 02:00:00	0.541	233.2	-0.439583	0.0581503
1239	2015-06-20 03:00:00	0.631933	310.7	0.170083	0.0571236
1240	2015-06-20 04:00:00	0.904183	289.7	0.294833	0.0578244
1241	2015-06-20 05:00:00	0.315217	247	1.64208	0.0562381
1242	2015-06-20 06:00:00	1.2062	245.7	1.49175	0.0579884
1243	2015-06-20 07:00:00	0.487367	201.9	1.76845	0.0578187
1244	2015-06-20 08:00:00	0.75375	107.4	2.2066	0.0557547
1245	2015-06-20 09:00:00	0.899033	114.6	2.27992	0.056612
1246	2015-06-20 10:00:00	0.718383	198.9	2.39535	0.0577156
1247	2015-06-20 11:00:00	0.907767	218.5	2.75008	0.057857
1248	2015-06-20 12:00:00	0.687483	195.2	3.19768	0.0573962
1249	2015-06-20 13:00:00	0.71125	147.5	3.92823	0.05528
1250	2015-06-20 14:00:00	1.04895	210.8	3.3757	0.0572199
1251	2015-06-20 15:00:00	1.67013	235.8	2.70258	0.0582225
1252	2015-06-20 16:00:00	1.1134	280	5.11175	0.0565474
1253	2015-06-20 17:00:00	0.910433	282.9	4.5086	0.0548787
1254	2015-06-20 18:00:00	0.929617	289.6	5.58533	0.0530472
1255	2015-06-20 19:00:00	1.60698	305.9	5.19822	0.0545819
1256	2015-06-20 20:00:00	1.01837	293	4.36472	0.0538397
1257	2015-06-20 21:00:00	0.5239	295.4	2.37572	0.0525652
1258	2015-06-20 22:00:00	1.6233	320.7	1.91937	0.0543247
1259	2015-06-20 23:00:00	0.700683	277.3	1.19818	0.0573037
1260	2015-06-21	0.591533	235.6	2.03285	0.0569823
1261	2015-06-21 01:00:00	0.2346	236.2	1.89638	0.0574959
1262	2015-06-21 02:00:00	0.216967	7.3	3.13937	0.0552191
1263	2015-06-21 03:00:00	0.999583	34.5	4.07283	0.0526996
1264	2015-06-21 04:00:00	1.17483	46.1	4.74208	0.0529312
1265	2015-06-21 05:00:00	0.619983	54.3	6.04788	0.0498328
1266	2015-06-21 06:00:00	0.5021	72.9	5.7276	0.0525732
1267	2015-06-21 07:00:00	0.9682	121.7	4.01575	0.0566303
1268	2015-06-21 08:00:00	1.5281	126.4	4.49082	0.0566772
1269	2015-06-21 09:00:00	1.43892	148.1	4.36703	0.0568641
1270	2015-06-21 10:00:00	2.09977	129.7	4.12598	0.0575399
1271	2015-06-21 11:00:00	1.3538	81.3	4.97525	0.0562182
1272	2015-06-21 12:00:00	1.38208	71.4	4.94917	0.0568862
1273	2015-06-21 13:00:00	1.28537	44.1	5.32617	0.0569567
1274	2015-06-21 14:00:00	1.18025	27.5	4.86837	0.0562982
1275	2015-06-21 15:00:00	2.02712	322.3	5.93528	0.0570964
1276	2015-06-21 16:00:00	2.21527	318.8	5.91105	0.0570152
1277	2015-06-21 17:00:00	3.18757	328.1	6.0902	0.0562486
1278	2015-06-21 18:00:00	3.46362	332.3	5.33735	0.0571528
1279	2015-06-21 19:00:00	3.15525	331.3	4.64832	0.0572254
1280	2015-06-21 20:00:00	1.50103	305.6	4.75782	0.0543
1281	2015-06-21 21:00:00	0.4538	285.1	2.84045	0.0530932
1282	2015-06-21 22:00:00	0.232733	293.1	2.72132	0.0539562
1283	2015-06-21 23:00:00	0.5112	247.2	1.69575	0.0557612
1284	2015-06-22	0.27045	252.2	1.7133	0.0560295
1285	2015-06-22 01:00:00	0.979733	245.6	2.18383	0.0562011
1286	2015-06-22 02:00:00	0.49265	258.1	2.7759	0.0572997
1287	2015-06-22 03:00:00	0.853033	326.7	1.99773	0.0570824
1288	2015-06-22 04:00:00	1.61365	333.5	2.21963	0.0575337
1289	2015-06-22 05:00:00	2.0727	354.5	2.3657	0.058261
1290	2015-06-22 06:00:00	2.63517	357.7	2.348	0.0579433
1291	2015-06-22 07:00:00	2.03048	28	2.70072	0.0580076
1292	2015-06-22 08:00:00	2.48425	351.3	2.70308	0.0582306
1293	2015-06-22 09:00:00	3.41768	329.5	2.67677	0.0581672
1294	2015-06-22 10:00:00	2.46483	318.8	3.61178	0.0575022
1295	2015-06-22 11:00:00	3.32153	331.1	3.69653	0.0584956
1296	2015-06-22 12:00:00	2.26715	9	4.18678	0.0578492
1297	2015-06-22 13:00:00	1.72377	89	4.74325	0.0575198
1298	2015-06-22 14:00:00	1.69575	115.4	4.66442	0.0571513
1299	2015-06-22 15:00:00	1.60217	109.6	4.14893	0.0574685
1300	2015-06-22 16:00:00	2.1622	82.8	3.80232	0.0575012
1301	2015-06-22 17:00:00	2.6345	95.2	4.32887	0.0577891
1302	2015-06-22 18:00:00	1.64392	113.6	4.90712	0.0553466
1303	2015-06-22 19:00:00	1.5256	97.6	3.42743	0.0573308
1304	2015-06-22 20:00:00	2.75735	313.5	2.59343	0.0563784
1305	2015-06-22 21:00:00	5.26682	314.6	1.59383	0.0570891
1306	2015-06-22 22:00:00	5.2263	313.9	1.266	0.0573373
1307	2015-06-22 23:00:00	5.18302	315.3	0.947583	0.0573808
1308	2015-06-23	4.61695	318.7	0.802217	0.0577311
1309	2015-06-23 01:00:00	4.63953	312.9	0.633633	0.0578339
1310	2015-06-23 02:00:00	4.05323	320.6	0.747783	0.0580999
1311	2015-06-23 03:00:00	1.44957	330.4	1.63452	0.0578795
1312	2015-06-23 04:00:00	1.02745	251.4	1.84065	0.0589115
1313	2015-06-23 05:00:00	0.677933	241.1	2.65237	0.0578745
1314	2015-06-23 06:00:00	0.55385	193.8	4.26417	0.0572189
1315	2015-06-23 07:00:00	0.7043	159.8	6.53155	0.0515949
1316	2015-06-23 08:00:00	2.72875	114	4.34835	0.0569618
1317	2015-06-23 09:00:00	2.5986	115.4	3.51375	0.0580866
1318	2015-06-23 10:00:00	1.19863	272.1	3.81723	0.0565075
1319	2015-06-23 11:00:00	2.36327	264.1	1.93598	0.0572436
1320	2015-06-23 12:00:00	1.71065	225.6	2.46053	0.0581916
1321	2015-06-23 13:00:00	0.8073	169.9	2.9546	0.0571035
1322	2015-06-23 14:00:00	1.88738	252.6	3.40978	0.0567981
1323	2015-06-23 15:00:00	3.53077	248	3.03397	0.0560625
1324	2015-06-23 16:00:00	3.4709	243.6	2.92688	0.0565496
1325	2015-06-23 17:00:00	3.90937	227.8	4.32608	0.0563261
1326	2015-06-23 18:00:00	4.0862	215.3	4.26562	0.0565203
1327	2015-06-23 19:00:00	3.16342	205.8	4.4281	0.0571317
1328	2015-06-23 20:00:00	3.07365	193.3	2.92842	0.0569307
1329	2015-06-23 21:00:00	4.23037	206.2	1.57927	0.0572433
1330	2015-06-23 22:00:00	4.36108	202.6	1.14722	0.0571851
1331	2015-06-23 23:00:00	2.59015	193.1	1.0868	0.0578296
1332	2015-06-24	1.76273	177.2	1.22895	0.0568011
1333	2015-06-24 01:00:00	3.6014	223	-0.0533667	0.0565295
1334	2015-06-24 02:00:00	3.49483	219.6	-0.241933	0.0566461
1335	2015-06-24 03:00:00	3.64677	215.7	-0.26205	0.0576973
1336	2015-06-24 04:00:00	3.29095	218.2	-0.345717	0.0574062
1337	2015-06-24 05:00:00	3.15083	207.4	-0.442717	0.0580885
1338	2015-06-24 06:00:00	3.2285	209	0.517983	0.0581554
1339	2015-06-24 07:00:00	5.37383	213.8	0.429967	0.0556212
1340	2015-06-24 08:00:00	6.8181	218.1	0.0912667	0.0539222
1341	2015-06-24 09:00:00	6.41187	215.3	1.31528	0.0554629
1342	2015-06-24 10:00:00	4.82767	212.2	2.72133	0.057145
1343	2015-06-24 11:00:00	4.24007	216.5	1.8969	0.057624
1344	2015-06-24 12:00:00	4.27752	214.1	2.19195	0.0569502
1345	2015-06-24 13:00:00	4.51433	219	2.39597	0.0566999
1346	2015-06-24 14:00:00	4.12113	238.5	2.14667	0.0569371
1347	2015-06-24 15:00:00	4.2684	234.8	1.69255	0.0557326
1348	2015-06-24 16:00:00	4.04473	230.6	1.47413	0.0565446
1349	2015-06-24 17:00:00	3.21287	223.6	2.04337	0.0575097
1350	2015-06-24 18:00:00	1.66665	252.7	1.8704	0.0578155
1351	2015-06-24 19:00:00	0.909867	240.1	1.67693	0.0579986
1352	2015-06-24 20:00:00	1.06217	244.9	1.26798	0.0578696
1353	2015-06-24 21:00:00	1.88867	233.8	0.838733	0.0581332
1354	2015-06-24 22:00:00	3.01748	222.4	0.671533	0.0578695
1355	2015-06-24 23:00:00	1.3917	233.2	0.734233	0.0581162
1356	2015-06-25	2.26915	222.6	0.223617	0.0576275
1357	2015-06-25 01:00:00	2.69208	222.1	0.161217	0.0580986
1358	2015-06-25 02:00:00	2.37317	232.7	0.415233	0.058267
1359	2015-06-25 03:00:00	2.6579	221.5	0.653583	0.058282
1360	2015-06-25 04:00:00	1.25097	210.5	1.50905	0.0589156
1361	2015-06-25 05:00:00	0.76325	255.7	1.51022	0.0584649
1362	2015-06-25 06:00:00	1.84537	3.8	1.94005	0.0572694
1363	2015-06-25 07:00:00	2.44415	349.8	2.25115	0.0584919
1364	2015-06-25 08:00:00	1.71452	262	2.30562	0.0581031
1365	2015-06-25 09:00:00	2.88683	222	1.95588	0.0576604
1366	2015-06-25 10:00:00	2.0774	233.4	2.83567	0.0588793
1367	2015-06-25 11:00:00	1.32027	310	3.48927	0.0576777
1368	2015-06-25 12:00:00	2.6482	18.9	3.3217	0.0579075
1369	2015-06-25 13:00:00	2.77367	13.1	3.2206	0.0583735
1370	2015-06-25 14:00:00	2.26672	358.6	3.38782	0.0583107
1371	2015-06-25 15:00:00	1.26173	298	3.04708	0.0576547
1372	2015-06-25 16:00:00	1.07222	263.8	2.89023	0.057483
1373	2015-06-25 17:00:00	2.12968	322.2	2.613	0.0581258
1374	2015-06-25 18:00:00	2.50717	316.4	2.17158	0.0584189
1375	2015-06-25 19:00:00	1.68885	312.7	1.8693	0.0579687
1376	2015-06-25 20:00:00	0.85545	284.3	1.75697	0.0578435
1377	2015-06-25 21:00:00	0.824383	216.3	1.30943	0.0587245
1378	2015-06-25 22:00:00	0.916717	226.2	0.90615	0.058688
1379	2015-06-25 23:00:00	1.59495	223.6	0.64155	0.0589198
1380	2015-06-26	1.73988	214.5	0.54765	0.0588418
1381	2015-06-26 01:00:00	2.36987	211.8	0.6284	0.0584631
1382	2015-06-26 02:00:00	2.23087	214.6	0.56385	0.0588908
1383	2015-06-26 03:00:00	2.19097	200.1	0.994633	0.0587736
1384	2015-06-26 04:00:00	1.652	187.9	1.48298	0.0588975
1385	2015-06-26 05:00:00	1.68377	173.3	1.95855	0.0586746
1386	2015-06-26 06:00:00	2.66645	212.4	1.80497	0.0577048
1387	2015-06-26 07:00:00	3.3683	220.7	1.77298	0.057271
1388	2015-06-26 08:00:00	1.77147	258.8	1.95577	0.0582174
1389	2015-06-26 09:00:00	1.27658	95.6	3.12443	0.0564192
1390	2015-06-26 10:00:00	1.46102	140.6	3.44752	0.0571337
1391	2015-06-26 11:00:00	2.11972	230.1	2.15635	0.0580951
1392	2015-06-26 12:00:00	2.22247	228.4	3.22373	0.0578219
1393	2015-06-26 13:00:00	1.64868	146.2	3.68812	0.0579038
1394	2015-06-26 14:00:00	1.41043	141.2	2.94255	0.0582584
1395	2015-06-26 15:00:00	1.54262	284.9	3.53767	0.0578253
1396	2015-06-26 16:00:00	1.16068	4.5	2.72272	0.0574166
1397	2015-06-26 17:00:00	1.30932	314.8	1.77768	0.0578374
1398	2015-06-26 18:00:00	0.905283	162.9	2.32093	0.0566543
1399	2015-06-26 19:00:00	1.9781	224	0.975183	0.0575632
1400	2015-06-26 20:00:00	1.2371	223.1	0.233233	0.0582244
1401	2015-06-26 21:00:00	0.36035	157.4	0.440683	0.0582229
1402	2015-06-26 22:00:00	0.56875	136.9	-0.0127	0.056797
1403	2015-06-26 23:00:00	0.15555	187.9	-0.4575	0.0568912
1404	2015-06-27	0.747267	160	-0.437517	0.0578788
1405	2015-06-27 01:00:00	0.497917	183.2	-0.69205	0.0584202
1406	2015-06-27 02:00:00	0.394333	233.6	-0.781817	0.058528
1407	2015-06-27 03:00:00	0.0926	225	-0.601833	0.0580511
1408	2015-06-27 04:00:00	0.17335	242.5	-0.701	0.058046
1409	2015-06-27 05:00:00	0.6477	223.9	-0.525833	0.0588436
1410	2015-06-27 06:00:00	0.214	181.5	-0.27035	0.058872
1411	2015-06-27 07:00:00	0.26355	182.6	-0.0772	0.057453
1412	2015-06-27 08:00:00	0.85955	167.9	0.336967	0.0583094
1413	2015-06-27 09:00:00	1.68567	117.5	0.57435	0.0582642
1414	2015-06-27 10:00:00	1.91428	118.9	0.763733	0.0581721
1415	2015-06-27 11:00:00	1.73902	124.3	0.9206	0.0587694
1416	2015-06-27 12:00:00	1.81262	127.8	1.65635	0.0581233
1417	2015-06-27 13:00:00	1.1904	111.1	1.74352	0.0582057
1418	2015-06-27 14:00:00	0.35025	78.5	1.25405	0.0567507
1419	2015-06-27 15:00:00	0.279967	251.5	1.24345	0.0561262
1420	2015-06-27 16:00:00	0.78465	254.4	1.87078	0.0579856
1421	2015-06-27 17:00:00	1.01375	269.7	2.37495	0.0582253
1422	2015-06-27 18:00:00	1.0294	295.9	2.49527	0.0576306
1423	2015-06-27 19:00:00	1.48462	32.3	2.56293	0.0578203
1424	2015-06-27 20:00:00	2.138	119.1	2.02307	0.0581316
1425	2015-06-27 21:00:00	2.98798	95.1	1.69525	0.0584143
1426	2015-06-27 22:00:00	4.7523	90.8	1.32485	0.0589236
1427	2015-06-27 23:00:00	5.62507	102.7	0.99385	0.058757
1428	2015-06-28	5.90947	102.6	0.998583	0.0586474
1429	2015-06-28 01:00:00	6.54918	112.4	0.812617	0.0586125
1430	2015-06-28 02:00:00	6.0498	118.5	0.753767	0.0587714
1431	2015-06-28 03:00:00	6.22012	122	0.792617	0.0586744
1432	2015-06-28 04:00:00	6.35607	115.1	0.895133	0.0587896
1433	2015-06-28 05:00:00	6.09085	119.5	1.63452	0.0588095
1434	2015-06-28 06:00:00	6.1516	123.7	2.11978	0.0585782
1435	2015-06-28 07:00:00	6.0899	124.1	1.98542	0.0588576
1436	2015-06-28 08:00:00	5.18832	129.2	3.02928	0.058718
1437	2015-06-28 09:00:00	5.14527	126.1	3.27495	0.0590782
1438	2015-06-28 10:00:00	5.33447	122.9	3.75608	0.0591823
1439	2015-06-28 11:00:00	6.32462	119	2.99373	0.0583884
1440	2015-06-28 12:00:00	6.2712	118.4	3.1896	0.0585061
1441	2015-06-28 13:00:00	5.73532	116.6	4.90618	0.0588403
1442	2015-06-28 14:00:00	5.67285	108.6	3.96803	0.058762
1443	2015-06-28 15:00:00	5.84212	108.1	2.90288	0.0588279
1444	2015-06-28 16:00:00	6.14615	114.3	2.7523	0.058589
1445	2015-06-28 17:00:00	5.78838	111.3	2.4027	0.0588371
1446	2015-06-28 18:00:00	5.5074	113.6	1.97777	0.0590126
1447	2015-06-28 19:00:00	5.76945	118.9	1.1412	0.0589309
1448	2015-06-28 20:00:00	5.54837	116.9	0.43735	0.0588708
1449	2015-06-28 21:00:00	5.46482	114.3	0.325383	0.0590945
1450	2015-06-28 22:00:00	4.0331	115.7	0.0213333	0.0592324
1451	2015-06-28 23:00:00	3.65565	124.1	-0.0338333	0.059074
1452	2015-06-29	3.33452	130.8	-0.181117	0.0588451
1453	2015-06-29 01:00:00	3.217	129.3	-0.283167	0.059231
1454	2015-06-29 02:00:00	3.6156	145	-0.24745	0.0586871
1455	2015-06-29 03:00:00	3.28615	215.5	-0.532083	0.0581936
1456	2015-06-29 04:00:00	2.9362	218.8	-0.212267	0.0586565
1457	2015-06-29 05:00:00	3.36815	127.4	0.54915	0.0599694
1458	2015-06-29 06:00:00	5.10345	119.7	0.555067	0.0594882
1459	2015-06-29 07:00:00	5.77127	119.9	0.715867	0.0589758
1460	2015-06-29 08:00:00	4.94323	113.8	1.0281	0.0595888
1461	2015-06-29 09:00:00	3.71782	114.4	1.3317	0.0594172
1462	2015-06-29 10:00:00	2.04037	89.4	1.992	0.0587434
1463	2015-06-29 11:00:00	1.56068	30.4	2.47033	0.0580302
1464	2015-06-29 12:00:00	3.44142	320.1	2.82323	0.0586716
1465	2015-06-29 13:00:00	3.99347	310	2.67568	0.0591827
1466	2015-06-29 14:00:00	3.62433	327.5	3.55097	0.0587291
1467	2015-06-29 15:00:00	2.54633	42.6	4.14612	0.058156
1468	2015-06-29 16:00:00	2.93682	354.5	4.47157	0.0581439
1469	2015-06-29 17:00:00	3.8754	310.7	3.2391	0.0577783
1470	2015-06-29 18:00:00	4.52245	321.1	2.536	0.0582706
1471	2015-06-29 19:00:00	4.14575	319.4	2.93062	0.0582254
1472	2015-06-29 20:00:00	3.35092	316.4	2.12277	0.0578323
1473	2015-06-29 21:00:00	2.45392	292.6	2.14253	0.056619
1474	2015-06-29 22:00:00	3.20778	306	1.70417	0.057729
1475	2015-06-29 23:00:00	3.714	308.7	1.06718	0.0575268
1476	2015-06-30	3.5908	304.6	0.83295	0.057207
1477	2015-06-30 01:00:00	3.77585	308.1	0.00483333	0.058133
1478	2015-06-30 02:00:00	4.43758	311.9	0.168717	0.0579548
1479	2015-06-30 03:00:00	2.18497	319.9	0.60635	0.0590717
1480	2015-06-30 04:00:00	0.4055	27.4	0.946717	0.0581866
1481	2015-06-30 05:00:00	2.19258	333.5	1.0988	0.0582809
1482	2015-06-30 06:00:00	3.66878	341.9	1.23485	0.0583036
1483	2015-06-30 07:00:00	2.78645	345.6	1.97402	0.0582947
1484	2015-06-30 08:00:00	0.58575	101.3	3.65805	0.0559138
1485	2015-06-30 09:00:00	0.819767	182.7	4.6903	0.0551002
1486	2015-06-30 10:00:00	1.42712	137.9	6.41073	0.0557577
1487	2015-06-30 11:00:00	1.97228	97.7	6.42483	0.0570544
1488	2015-06-30 12:00:00	1.4234	89	6.88598	0.0557752
1489	2015-06-30 13:00:00	2.11737	118.2	6.66402	0.0566676
1490	2015-06-30 14:00:00	2.40505	109.3	8.00875	0.0567379
1491	2015-06-30 15:00:00	1.64555	159.8	9.1615	0.0543901
1492	2015-06-30 16:00:00	2.51322	266.5	8.61343	0.0559869
1493	2015-06-30 17:00:00	3.43015	341.4	7.83537	0.0559654
1494	2015-06-30 18:00:00	3.18685	338.5	6.96623	0.0560445
1495	2015-06-30 19:00:00	2.78023	346.6	5.83413	0.0541216
1496	2015-06-30 20:00:00	3.1974	7.1	3.99343	0.0557504
1497	2015-06-30 21:00:00	3.08995	0.3	2.803	0.0556152
1498	2015-06-30 22:00:00	3.65695	8.5	1.97363	0.0556824
1499	2015-06-30 23:00:00	3.71672	359.5	1.18903	0.0555542
1500	2015-07-01	3.048	353.3	0.643533	0.0563786
1501	2015-07-01 01:00:00	1.55692	9.8	0.2884	0.0574086
1502	2015-07-01 02:00:00	1.5848	225.8	0.350767	0.0579846
1503	2015-07-01 03:00:00	3.56325	259.1	-0.27795	0.0571214
1504	2015-07-01 04:00:00	3.90917	247.4	-0.126083	0.0567867
1505	2015-07-01 05:00:00	3.55705	220.1	0.53245	0.0574686
1506	2015-07-01 06:00:00	4.78672	213.2	1.77552	0.0571974
1507	2015-07-01 07:00:00	5.81813	214.9	2.43967	0.0562894
1508	2015-07-01 08:00:00	6.29103	215.3	4.95228	0.055798
1509	2015-07-01 09:00:00	7.09807	215.8	2.53017	0.0540313
1510	2015-07-01 10:00:00	7.07983	212.6	2.74885	0.0536124
1511	2015-07-01 11:00:00	6.15808	204.8	2.56408	0.0549235
1512	2015-07-01 12:00:00	6.39672	202.6	2.85223	0.054365
1513	2015-07-01 13:00:00	8.75768	215.5	2.05645	0.0505995
1514	2015-07-01 14:00:00	6.96763	211.6	2.4319	0.0544665
1515	2015-07-01 15:00:00	7.63515	206.4	1.39445	0.0529122
1516	2015-07-01 16:00:00	8.2156	211.4	0.384567	0.0522788
1517	2015-07-01 17:00:00	8.68247	206.3	0.661217	0.0515372
1518	2015-07-01 18:00:00	9.299	208.5	0.411267	0.0506882
1519	2015-07-01 19:00:00	8.92155	205.8	0.227783	0.0516446
1520	2015-07-01 20:00:00	7.2709	209.8	-0.327217	0.0533057
1521	2015-07-01 21:00:00	7.28288	214.6	-0.620017	0.0536034
1522	2015-07-01 22:00:00	7.58717	215.5	-1.05862	0.0533168
1523	2015-07-01 23:00:00	7.28983	213.6	-0.730967	0.0526436
1524	2015-07-02	6.35045	209.7	-0.7646	0.0549828
1525	2015-07-02 01:00:00	5.53765	194.9	-0.957833	0.0563725
1526	2015-07-02 02:00:00	3.87973	182.5	-0.922783	0.0568681
1527	2015-07-02 03:00:00	1.8074	146.5	-0.475983	0.0577
1528	2015-07-02 04:00:00	1.7322	141.6	-0.2591	0.0574751
1529	2015-07-02 05:00:00	0.880583	131.4	-0.296433	0.0575642
1530	2015-07-02 06:00:00	3.47667	208.7	0.368967	0.0563815
1531	2015-07-02 07:00:00	3.57488	203.2	0.466067	0.0568327
1532	2015-07-02 08:00:00	4.73507	249.5	-0.64355	0.0539753
1533	2015-07-02 09:00:00	3.50323	255.4	0.0217	0.0565932
1534	2015-07-02 10:00:00	4.13348	256.3	0.4748	0.0553982
1535	2015-07-02 11:00:00	4.19403	263.1	0.677733	0.0556534
1536	2015-07-02 12:00:00	4.51058	284.1	0.4979	0.0556935
1537	2015-07-02 13:00:00	5.9048	327.4	-0.477283	0.0569541
1538	2015-07-02 14:00:00	6.14915	321.2	-0.795333	0.0576383
1539	2015-07-02 15:00:00	4.35497	313.9	-0.927617	0.058073
1540	2015-07-02 16:00:00	3.97248	309	-0.0592333	0.0579158
1541	2015-07-02 17:00:00	5.68715	311.8	0.08485	0.0574054
1542	2015-07-02 18:00:00	6.18695	310.2	-0.743833	0.056503
1543	2015-07-02 19:00:00	5.90145	307.8	-0.9743	0.0569488
1544	2015-07-02 20:00:00	6.57213	312.6	-0.589783	0.0564128
1545	2015-07-02 21:00:00	7.01	313.4	-0.90635	0.0558591
1546	2015-07-02 22:00:00	6.40692	313.3	-1.2067	0.0566136
1547	2015-07-02 23:00:00	6.1764	311.5	-1.20123	0.0569847
1548	2015-07-03	5.77452	310.9	-1.24718	0.057668
1549	2015-07-03 01:00:00	6.43657	311.8	-1.33508	0.057056
1550	2015-07-03 02:00:00	6.83992	313.1	-1.29352	0.0566556
1551	2015-07-03 03:00:00	6.65218	312.4	-1.07632	0.0569666
1552	2015-07-03 04:00:00	6.72823	315.5	-0.7693	0.0570675
1553	2015-07-03 05:00:00	6.8332	314.7	-0.317967	0.056627
1554	2015-07-03 06:00:00	5.9885	316.3	0.880267	0.0573593
1555	2015-07-03 07:00:00	7.02105	315.2	0.806967	0.0560035
1556	2015-07-03 08:00:00	7.01737	319.5	1.23382	0.0569963
1557	2015-07-03 09:00:00	6.42602	318	1.60033	0.0563797
1558	2015-07-03 10:00:00	6.39275	313.4	2.11393	0.0566392
1559	2015-07-03 11:00:00	5.783	310.2	2.76523	0.0574833
1560	2015-07-03 12:00:00	6.3643	310.7	3.09147	0.0568687
1561	2015-07-03 13:00:00	6.1503	316.4	3.06643	0.0574692
1562	2015-07-03 14:00:00	5.1331	314.5	5.11638	0.057697
1563	2015-07-03 15:00:00	5.4496	323	5.28918	0.0569462
1564	2015-07-03 16:00:00	3.21157	331.2	6.63037	0.058333
1565	2015-07-03 17:00:00	4.44837	337.9	5.99997	0.0560917
1566	2015-07-03 18:00:00	6.2155	330.4	4.20632	0.0561827
1567	2015-07-03 19:00:00	4.58657	331.4	4.08298	0.0570506
1568	2015-07-03 20:00:00	0.70775	20.6	5.27152	0.052934
1569	2015-07-03 21:00:00	1.69718	30.1	3.3507	0.0540552
1570	2015-07-03 22:00:00	2.28352	354.3	3.1312	0.0541884
1571	2015-07-03 23:00:00	2.50352	340.7	2.14797	0.0550142
1572	2015-07-04	1.8813	6.2	1.83235	0.0546242
1573	2015-07-04 01:00:00	0.932483	32.3	2.48202	0.0522068
1574	2015-07-04 02:00:00	3.34822	322.7	2.26893	0.0559923
1575	2015-07-04 03:00:00	5.55315	331.1	1.72257	0.056769
1576	2015-07-04 04:00:00	6.19332	324.1	1.31235	0.0572838
1577	2015-07-04 05:00:00	2.91258	313.8	1.57773	0.0582147
1578	2015-07-04 06:00:00	5.58357	334	1.29443	0.0577899
1579	2015-07-04 07:00:00	5.57203	337.6	1.88705	0.0581411
1580	2015-07-04 08:00:00	6.06843	328.8	2.59728	0.0578881
1581	2015-07-04 09:00:00	5.12217	331	3.4635	0.0580339
1582	2015-07-04 10:00:00	5.49917	336.9	4.23387	0.0586942
1583	2015-07-04 11:00:00	6.02343	330.4	4.33305	0.0583857
1584	2015-07-04 12:00:00	6.4615	329.1	5.26888	0.0570772
1585	2015-07-04 13:00:00	6.38972	332.1	5.18397	0.0581303
1586	2015-07-04 14:00:00	5.7056	338.6	6.22943	0.0575534
1587	2015-07-04 15:00:00	6.02583	346.1	4.58177	0.0567448
1588	2015-07-04 16:00:00	4.95235	343.5	5.91968	0.0579072
1589	2015-07-04 17:00:00	4.56658	341	3.50975	0.0577989
1590	2015-07-04 18:00:00	3.84322	338.7	4.60107	0.0577437
1591	2015-07-04 19:00:00	2.74887	5.1	4.87477	0.0568215
1592	2015-07-04 20:00:00	1.69077	22.8	2.4267	0.0566585
1593	2015-07-04 21:00:00	0.980267	73.9	1.30652	0.0570852
1594	2015-07-04 22:00:00	1.51792	40.6	0.863467	0.0571625
1595	2015-07-04 23:00:00	1.3842	35.6	1.05583	0.0577597
1596	2015-07-05	1.54958	19.9	0.906683	0.0578395
1597	2015-07-05 01:00:00	2.15655	3.8	0.765033	0.0574293
1598	2015-07-05 02:00:00	2.55593	356.7	0.358683	0.0578962
1599	2015-07-05 03:00:00	2.02695	349.2	0.332617	0.0580202
1600	2015-07-05 04:00:00	0.928417	62.5	0.621617	0.0576264
1601	2015-07-05 05:00:00	0.772133	176.6	1.47662	0.05779
1602	2015-07-05 06:00:00	0.976983	24.5	1.9957	0.0567996
1603	2015-07-05 07:00:00	1.40427	38.5	1.73437	0.0577339
1604	2015-07-05 08:00:00	2.24917	350.5	1.96102	0.058118
1605	2015-07-05 09:00:00	1.30867	39.3	2.41483	0.0570912
1606	2015-07-05 10:00:00	0.732667	341.3	3.215	0.0555263
1607	2015-07-05 11:00:00	2.37755	340.5	3.4922	0.0573246
1608	2015-07-05 12:00:00	3.38255	346.5	3.57827	0.0580214
1609	2015-07-05 13:00:00	3.18548	352	3.91603	0.0573578
1610	2015-07-05 14:00:00	2.61823	353.2	4.1339	0.0572468
1611	2015-07-05 15:00:00	1.5148	331	5.71793	0.0561177
1612	2015-07-05 16:00:00	1.50737	272.4	6.81653	0.0542957
1613	2015-07-05 17:00:00	3.32048	5.3	4.64432	0.0558023
1614	2015-07-05 18:00:00	1.27048	23.2	6.02795	0.0545211
1615	2015-07-05 19:00:00	1.71663	11.1	5.4654	0.0551274
1616	2015-07-05 20:00:00	0.787083	18.6	5.10647	0.0524087
1617	2015-07-05 21:00:00	1.72285	0.5	3.96882	0.0540781
1618	2015-07-05 22:00:00	1.5549	356.2	3.51985	0.0537718
1619	2015-07-05 23:00:00	0.47015	314.3	3.0281	0.0512804
1620	2015-07-06	0.895617	333.2	3.15585	0.0524519
1621	2015-07-06 01:00:00	1.30398	28.5	4.29027	0.0529805
1622	2015-07-06 02:00:00	1.501	20.8	4.91043	0.0522518
1623	2015-07-06 03:00:00	2.12345	12	5.90697	0.0536895
1624	2015-07-06 04:00:00	2.68928	20.5	6.0366	0.0550179
1625	2015-07-06 05:00:00	3.39257	358	3.57403	0.0573336
1626	2015-07-06 06:00:00	3.45742	352.6	3.61878	0.0573821
1627	2015-07-06 07:00:00	3.42808	331.7	3.59207	0.0576796
1628	2015-07-06 08:00:00	2.19408	347.1	4.04632	0.0574039
1629	2015-07-06 09:00:00	2.10385	34.4	4.03728	0.0569324
1630	2015-07-06 10:00:00	2.20762	35.4	4.24103	0.05724
1631	2015-07-06 11:00:00	2.2473	27.2	5.11027	0.0571467
1632	2015-07-06 12:00:00	2.34898	10.2	5.12058	0.0577509
1633	2015-07-06 13:00:00	2.03318	34.9	5.33035	0.056524
1634	2015-07-06 14:00:00	2.02107	37.7	6.12533	0.0560243
1635	2015-07-06 15:00:00	3.15482	5	5.44458	0.0568403
1636	2015-07-06 16:00:00	4.04047	336.8	6.67002	0.0576029
1637	2015-07-06 17:00:00	3.73313	335.1	5.42632	0.0575292
1638	2015-07-06 18:00:00	3.6215	338.3	5.33923	0.0563127
1639	2015-07-06 19:00:00	3.01257	1.5	5.20903	0.0565376
1640	2015-07-06 20:00:00	2.45377	11	5.05753	0.0554746
1641	2015-07-06 21:00:00	1.75263	10.8	3.9342	0.053894
1642	2015-07-06 22:00:00	1.3447	19.8	3.27675	0.053551
1643	2015-07-06 23:00:00	1.34048	342.9	3.07267	0.0536792
1644	2015-07-07	0.594817	117.3	2.52937	0.0520872
1645	2015-07-07 01:00:00	1.61038	112.1	3.21232	0.0543688
1646	2015-07-07 02:00:00	2.07373	174.1	3.88463	0.0557313
1647	2015-07-07 03:00:00	1.35227	101.9	5.03607	0.0533919
1648	2015-07-07 04:00:00	2.11825	94	5.6042	0.0547937
1649	2015-07-07 05:00:00	1.99625	129.9	6.23368	0.0553954
1650	2015-07-07 06:00:00	2.11848	77	6.82577	0.0545672
1651	2015-07-07 07:00:00	2.63975	117.5	7.6027	0.0565012
1652	2015-07-07 08:00:00	2.41897	133.7	8.3414	0.0560232
1653	2015-07-07 09:00:00	3.35057	96.9	7.69877	0.0562098
1654	2015-07-07 10:00:00	4.16605	101.8	8.22493	0.0576941
1655	2015-07-07 11:00:00	3.54887	93	8.52105	0.0573886
1656	2015-07-07 12:00:00	3.56013	95.5	9.15872	0.0562923
1657	2015-07-07 13:00:00	6.65287	109.7	7.72292	0.0571182
1658	2015-07-07 14:00:00	7.31375	117.2	7.48145	0.0571621
1659	2015-07-07 15:00:00	7.93125	117.7	7.77583	0.0573127
1660	2015-07-07 16:00:00	10.8537	117.7	6.38953	0.0554779
1661	2015-07-07 17:00:00	8.51083	117.3	5.73167	0.0562516
1662	2015-07-07 18:00:00	7.2363	119.9	4.83013	0.0570546
1663	2015-07-07 19:00:00	5.87032	130.8	3.70508	0.0575915
1664	2015-07-07 20:00:00	5.25968	123.4	3.58772	0.0581139
1665	2015-07-07 21:00:00	6.169	123.2	3.74283	0.0574255
1666	2015-07-07 22:00:00	5.65118	112.3	4.24708	0.0573149
1667	2015-07-07 23:00:00	6.61687	100	3.35203	0.0567067
1668	2015-07-08	7.08307	110.6	2.38915	0.0572035
1669	2015-07-08 01:00:00	5.43862	93.3	2.72402	0.0582163
1670	2015-07-08 02:00:00	6.09707	97.4	3.10787	0.0580268
1671	2015-07-08 03:00:00	6.04898	110.9	3.25222	0.0577072
1672	2015-07-08 04:00:00	8.46533	100	3.34042	0.057005
1673	2015-07-08 05:00:00	9.84845	121.7	4.01477	0.0561703
1674	2015-07-08 06:00:00	10.1702	129.6	4.22748	0.0558652
1675	2015-07-08 07:00:00	6.63033	117	5.31343	0.0570068
1676	2015-07-08 08:00:00	6.67552	123	4.63558	0.0571354
1677	2015-07-08 09:00:00	7.21613	115.6	4.87665	0.0566758
1678	2015-07-08 10:00:00	4.7486	100.3	5.94222	0.0576281
1679	2015-07-08 11:00:00	6.33902	124.1	9.9317	0.0583795
1680	2015-07-08 12:00:00	6.09683	114.5	9.02037	0.0569825
1681	2015-07-08 13:00:00	6.13787	118.4	7.4077	0.0569128
1682	2015-07-08 14:00:00	6.29352	119.3	7.38185	0.0563895
1683	2015-07-08 15:00:00	5.63523	132.1	8.39523	0.0555886
1684	2015-07-08 16:00:00	4.94528	122.1	8.7772	0.0570365
1685	2015-07-08 17:00:00	5.43025	108.2	6.79608	0.0562698
1686	2015-07-08 18:00:00	5.0847	108.1	4.79648	0.0564575
1687	2015-07-08 19:00:00	4.52643	111.8	4.4654	0.0568899
1688	2015-07-08 20:00:00	2.17815	119.8	5.00993	0.0564389
1689	2015-07-08 21:00:00	1.11292	105.4	4.78068	0.0550642
1690	2015-07-08 22:00:00	3.15172	115.6	4.83118	0.0564448
1691	2015-07-08 23:00:00	2.43717	130.2	3.93548	0.0565085
1692	2015-07-09	1.74895	204.5	3.0768	0.0569844
1693	2015-07-09 01:00:00	0.568767	255.7	3.82105	0.0572185
1694	2015-07-09 02:00:00	1.54933	126.9	3.74835	0.0569333
1695	2015-07-09 03:00:00	1.72343	137	3.70535	0.0568867
1696	2015-07-09 04:00:00	1.62335	207.3	4.2737	0.0572803
1697	2015-07-09 05:00:00	1.74903	187.8	4.86897	0.057157
1698	2015-07-09 06:00:00	2.60078	103	6.34377	0.0560211
1699	2015-07-09 07:00:00	1.23977	164.8	9.34118	0.055463
1700	2015-07-09 08:00:00	2.4429	94.8	9.293	0.0560514
1701	2015-07-09 09:00:00	1.50948	92.8	9.7145	0.0544502
1702	2015-07-09 10:00:00	1.40345	65.5	10.5355	0.0542062
1703	2015-07-09 11:00:00	1.83462	51.2	10.1393	0.0559721
1704	2015-07-09 12:00:00	1.60633	56.5	10.1282	0.0556357
1705	2015-07-09 13:00:00	1.54725	90	10.8722	0.0556431
1706	2015-07-09 14:00:00	2.32173	93.8	10.9103	0.0554454
1707	2015-07-09 15:00:00	2.04872	88.1	11.3593	0.0564244
1708	2015-07-09 16:00:00	2.67853	98.2	10.9077	0.0563655
1709	2015-07-09 17:00:00	3.30655	110.1	10.3523	0.0564001
1710	2015-07-09 18:00:00	1.94295	120.8	10.0807	0.0553091
1711	2015-07-09 19:00:00	2.10197	118.8	8.78417	0.0557777
1712	2015-07-09 20:00:00	2.05482	145.5	7.4593	0.0556684
1713	2015-07-09 21:00:00	1.46898	123.7	6.24938	0.0556675
1714	2015-07-09 22:00:00	0.94735	204.8	5.94722	0.0555114
1715	2015-07-09 23:00:00	1.1394	144.8	6.15468	0.0549687
1716	2015-07-10	1.3285	97.8	5.69517	0.055976
1717	2015-07-10 01:00:00	1.47775	129.3	6.25782	0.0542723
1718	2015-07-10 02:00:00	1.24448	248.3	6.68432	0.0559079
1719	2015-07-10 03:00:00	1.37717	101.3	7.17867	0.0552411
1720	2015-07-10 04:00:00	0.788817	155.2	8.2973	0.0556229
1721	2015-07-10 05:00:00	1.23213	124.3	9.11405	0.0536093
1722	2015-07-10 06:00:00	2.04622	112.9	10.062	0.0541254
1723	2015-07-10 07:00:00	1.1984	117	10.5045	0.0542672
1724	2015-07-10 08:00:00	1.335	92	10.8985	0.0537538
1725	2015-07-10 09:00:00	1.0113	71.8	10.5772	0.0542264
1726	2015-07-10 10:00:00	0.901117	67.9	10.7398	0.0534001
1727	2015-07-10 11:00:00	1.12197	76.4	9.498	0.0537399
1728	2015-07-10 12:00:00	1.37625	88.1	9.56767	0.055771
1729	2015-07-10 13:00:00	1.79405	85.4	10.1798	0.0545843
1730	2015-07-10 14:00:00	1.83692	91.4	10.394	0.0559193
1731	2015-07-10 15:00:00	1.31167	95	11.3738	0.054598
1732	2015-07-10 16:00:00	1.12328	57.2	10.8115	0.0540453
1733	2015-07-10 17:00:00	0.577367	43.3	7.81647	0.0550313
1734	2015-07-10 18:00:00	0.32655	86.4	8.32663	0.0543021
1735	2015-07-10 19:00:00	0.773233	229.6	7.95847	0.0545485
1736	2015-07-10 20:00:00	0.195317	343.6	7.48275	0.0546466
1737	2015-07-10 21:00:00	0.0579667	225	6.79662	0.0544354
1738	2015-07-10 22:00:00	0.1321	225	6.68703	0.0546341
1739	2015-07-10 23:00:00	0.127667	27.5	5.25882	0.054511
1740	2015-07-11	0.190983	225	5.78148	0.052
1741	2015-07-11 01:00:00	0.43945	74.8	5.23838	0.054108
1742	2015-07-11 02:00:00	0.372533	262.8	6.29847	0.0529365
1743	2015-07-11 03:00:00	0.132217	220.3	7.0129	0.051859
1744	2015-07-11 04:00:00	0.197933	340.8	7.3161	0.0531685
1745	2015-07-11 05:00:00	0.4762	69.9	7.7128	0.0538054
1746	2015-07-11 06:00:00	0.907483	48.2	9.32033	0.052349
1747	2015-07-11 07:00:00	0.738783	14.2	9.457	0.0527972
1748	2015-07-11 08:00:00	1.28943	45.5	9.59667	0.0528217
1749	2015-07-11 09:00:00	1.91745	40.8	9.201	0.054589
1750	2015-07-11 10:00:00	2.23508	31.4	8.74867	0.0563649
1751	2015-07-11 11:00:00	2.92678	19.3	8.73455	0.0557484
1752	2015-07-11 12:00:00	3.00232	10.4	7.9887	0.0560827
1753	2015-07-11 13:00:00	3.62245	8.1	6.44063	0.056955
1754	2015-07-11 14:00:00	3.53632	0.9	5.43755	0.0559169
1755	2015-07-11 15:00:00	2.78675	1.7	4.95157	0.0566002
1756	2015-07-11 16:00:00	1.85523	16.2	4.38298	0.0571658
1757	2015-07-11 17:00:00	0.694633	60.1	4.13325	0.0568521
1758	2015-07-11 18:00:00	0.908067	65.2	3.85827	0.0563207
1759	2015-07-11 19:00:00	0.91175	252.1	3.70702	0.0568651
1760	2015-07-11 20:00:00	0.525	224.1	3.24607	0.0562874
1761	2015-07-11 21:00:00	1.15958	226.1	2.9937	0.0567614
1762	2015-07-11 22:00:00	0.946917	248.4	2.549	0.0568733
1763	2015-07-11 23:00:00	0.846717	239.9	2.3528	0.057322
1764	2015-07-12	0.909033	209.1	2.28945	0.057499
1765	2015-07-12 01:00:00	1.77085	232.1	2.00472	0.0569572
1766	2015-07-12 02:00:00	1.1541	230.6	2.00438	0.0580483
1767	2015-07-12 03:00:00	0.946217	234.9	1.86927	0.0573649
1768	2015-07-12 04:00:00	1.02343	236.9	1.6215	0.0572287
1769	2015-07-12 05:00:00	1.1223	247.9	1.67083	0.0574993
1770	2015-07-12 06:00:00	0.95595	237.9	1.87078	0.058174
1771	2015-07-12 07:00:00	1.12533	227.4	2.10763	0.0579285
1772	2015-07-12 08:00:00	1.02275	268.7	2.53917	0.0574641
1773	2015-07-12 09:00:00	1.40138	252.5	2.9885	0.0577994
1774	2015-07-12 10:00:00	0.867883	234.3	3.51903	0.0573126
1775	2015-07-12 11:00:00	0.7946	239.8	4.38643	0.0568108
1776	2015-07-12 12:00:00	1.36848	77.2	4.38183	0.056947
1777	2015-07-12 13:00:00	1.17722	69.1	4.28475	0.0565776
1778	2015-07-12 14:00:00	1.43238	78.8	3.58073	0.0567773
1779	2015-07-12 15:00:00	1.4635	90.6	3.43238	0.0576268
1780	2015-07-12 16:00:00	1.89355	92.9	3.47645	0.0576871
1781	2015-07-12 17:00:00	1.66568	106.7	3.5949	0.0568623
1782	2015-07-12 18:00:00	1.34622	99.9	3.52435	0.0566642
1783	2015-07-12 19:00:00	0.720783	333.9	3.05243	0.057065
1784	2015-07-12 20:00:00	0.550633	268.8	2.94358	0.0571556
1785	2015-07-12 21:00:00	0.54745	235.5	2.81822	0.0571353
1786	2015-07-12 22:00:00	0.670967	226.6	2.46733	0.0569849
1787	2015-07-12 23:00:00	0.9403	181	2.42247	0.0570552
1788	2015-07-13	1.02485	125	2.26253	0.0572937
1789	2015-07-13 01:00:00	0.924567	103.2	2.04005	0.056936
1790	2015-07-13 02:00:00	0.6486	278.1	1.93713	0.0569124
1791	2015-07-13 03:00:00	0.7774	226.2	1.72353	0.0569814
1792	2015-07-13 04:00:00	0.6589	233.9	2.16118	0.0571258
1793	2015-07-13 05:00:00	0.758283	243.2	2.04435	0.0577277
1794	2015-07-13 06:00:00	1.11945	231.7	2.6366	0.0576734
1795	2015-07-13 07:00:00	1.63288	66.7	2.60332	0.0566924
1796	2015-07-13 08:00:00	1.10177	79.4	3.45903	0.0559782
1797	2015-07-13 09:00:00	0.759333	58.7	4.21138	0.0560601
1798	2015-07-13 10:00:00	1.04067	14.9	5.38037	0.0560337
1799	2015-07-13 11:00:00	1.68368	15.1	3.91248	0.056369
1800	2015-07-13 12:00:00	1.55202	50.4	4.05458	0.0566801
1801	2015-07-13 13:00:00	1.12573	69.3	4.56992	0.0564383
1802	2015-07-13 14:00:00	1.17177	352	5.71012	0.0551347
1803	2015-07-13 15:00:00	1.88603	9.4	4.90743	0.0571767
1804	2015-07-13 16:00:00	2.00857	18.6	4.18915	0.0568416
1805	2015-07-13 17:00:00	2.44597	342.1	4.0475	0.057151
1806	2015-07-13 18:00:00	1.17187	321.2	3.78747	0.056794
1807	2015-07-13 19:00:00	0.704183	307.3	3.39652	0.0566994
1808	2015-07-13 20:00:00	0.54305	48.3	3.33835	0.056203
1809	2015-07-13 21:00:00	0.735883	50.2	3.15817	0.0563912
1810	2015-07-13 22:00:00	0.6478	223.9	2.88842	0.0568204
1811	2015-07-13 23:00:00	0.347433	171.4	2.8488	0.0570388
1812	2015-07-14	0.611133	112.7	2.6252	0.0566216
1813	2015-07-14 01:00:00	0.716767	93	2.4098	0.0566694
1814	2015-07-14 02:00:00	0.386983	153.9	2.23627	0.0566989
1815	2015-07-14 03:00:00	0.201133	225	1.7656	0.0570714
1816	2015-07-14 04:00:00	0.776033	236.5	2.02453	0.0572639
1817	2015-07-14 05:00:00	0.29815	233.6	1.82658	0.0568876
1818	2015-07-14 06:00:00	0.0744667	225	2.08837	0.0567026
1819	2015-07-14 07:00:00	0.0772833	291	2.90237	0.0572568
1820	2015-07-14 08:00:00	0.265367	339.2	3.79842	0.0555628
1821	2015-07-14 09:00:00	1.16735	313.5	3.93963	0.0562797
1822	2015-07-14 10:00:00	0.813333	2.8	4.60567	0.0555484
1823	2015-07-14 11:00:00	0.858633	28.2	5.42765	0.0560896
1824	2015-07-14 12:00:00	3.9488	341	6.63918	0.0573398
1825	2015-07-14 13:00:00	4.05245	344.1	7.35628	0.0566458
1826	2015-07-14 14:00:00	4.93473	345.9	7.92598	0.0567186
1827	2015-07-14 15:00:00	4.40012	354.9	7.96392	0.0552254
1828	2015-07-14 16:00:00	2.7817	21.4	5.90142	0.0558463
1829	2015-07-14 17:00:00	2.66528	3.7	4.88117	0.0563439
1830	2015-07-14 18:00:00	2.1044	22.3	4.08335	0.0569662
1831	2015-07-14 19:00:00	2.52393	15.6	3.00587	0.0566995
1832	2015-07-14 20:00:00	2.06248	17.2	2.35488	0.0567063
1833	2015-07-14 21:00:00	1.21587	70.5	1.95043	0.0573061
1834	2015-07-14 22:00:00	1.44877	91	1.59858	0.0572971
1835	2015-07-14 23:00:00	0.534967	136.2	1.64522	0.056717
1836	2015-07-15	0.55235	242.2	1.66068	0.0571118
1837	2015-07-15 01:00:00	1.50338	222.2	2.3237	0.0569982
1838	2015-07-15 02:00:00	1.1637	180.2	1.93937	0.0571113
1839	2015-07-15 03:00:00	1.19093	106.3	1.40227	0.0574087
1840	2015-07-15 04:00:00	1.08827	130.7	1.15872	0.0574646
1841	2015-07-15 05:00:00	1.43488	89.5	1.84593	0.0570962
1842	2015-07-15 06:00:00	1.5861	117.1	2.53305	0.0579079
1843	2015-07-15 07:00:00	1.4726	135.7	4.44507	0.0568939
1844	2015-07-15 08:00:00	0.87985	103.9	3.69527	0.056876
1845	2015-07-15 09:00:00	1.22973	59	6.85773	0.0555326
1846	2015-07-15 10:00:00	1.31375	64.6	8.59015	0.0562524
1847	2015-07-15 11:00:00	4.33017	104.2	8.47953	0.0571589
1848	2015-07-15 12:00:00	4.49675	95.8	8.3674	0.0576461
1849	2015-07-15 13:00:00	4.34572	104.6	9.23067	0.057599
1850	2015-07-15 14:00:00	2.37088	67.8	10.5267	0.0554609
1851	2015-07-15 15:00:00	3.99002	352.1	10.3302	0.0541418
1852	2015-07-15 16:00:00	8.21148	318.3	8.68083	0.0530197
1853	2015-07-15 17:00:00	8.81018	319.6	8.31163	0.052355
1854	2015-07-15 18:00:00	9.55037	314.5	7.21775	0.0509973
1855	2015-07-15 19:00:00	11.7108	311.1	3.84777	0.048986
1856	2015-07-15 20:00:00	11.1462	315.3	2.0896	0.0517171
1857	2015-07-15 21:00:00	8.96735	2.3	3.2141	0.0550456
1858	2015-07-15 22:00:00	8.65813	110.5	2.79105	0.056098
1859	2015-07-15 23:00:00	6.5563	107.6	2.0617	0.0569827
1860	2015-07-16	6.45917	97.1	1.70213	0.0571716
1861	2015-07-16 01:00:00	9.01073	98.4	1.89227	0.0546364
1862	2015-07-16 02:00:00	12.2095	116.6	1.98727	0.0546533
1863	2015-07-16 03:00:00	9.16955	121.7	2.61232	0.0565744
1864	2015-07-16 04:00:00	7.83055	108.6	3.49197	0.056437
1865	2015-07-16 05:00:00	5.89512	100.1	4.56502	0.0566949
1866	2015-07-16 06:00:00	4.36292	19.2	5.88482	0.0570671
1867	2015-07-16 07:00:00	4.99907	105.8	6.07495	0.0570559
1868	2015-07-16 08:00:00	2.72303	46.8	7.53782	0.0567272
1869	2015-07-16 09:00:00	1.83698	32.6	6.97277	0.0566803
1870	2015-07-16 10:00:00	1.81967	313.8	4.76637	0.0569685
1871	2015-07-16 11:00:00	1.12013	316.1	5.5204	0.0576
1872	2015-07-16 12:00:00	3.79472	94	6.90337	0.0583439
1873	2015-07-16 13:00:00	1.85588	116.2	6.77692	0.0571667
1874	2015-07-16 14:00:00	1.22592	318.5	6.4803	0.0570191
1875	2015-07-16 15:00:00	4.29323	103.1	5.83748	0.056514
1876	2015-07-16 16:00:00	7.76417	104.1	5.1575	0.0564504
1877	2015-07-16 17:00:00	7.69308	108.1	5.13488	0.0555223
1878	2015-07-16 18:00:00	8.53302	111.4	4.03408	0.0554703
1879	2015-07-16 19:00:00	9.34203	111.3	3.96122	0.0552383
1880	2015-07-16 20:00:00	10.9111	111.6	3.68023	0.0540048
1881	2015-07-16 21:00:00	12.2973	99.1	3.47658	0.054758
1882	2015-07-16 22:00:00	6.77833	107	3.13328	0.0560483
1883	2015-07-16 23:00:00	4.63707	124.2	2.92342	0.056327
1884	2015-07-17	3.8344	126.6	2.97898	0.0564794
1885	2015-07-17 01:00:00	1.72597	176.9	3.15565	0.0564678
1886	2015-07-17 02:00:00	2.31277	140.9	3.01928	0.0570562
1887	2015-07-17 03:00:00	4.04745	140.2	3.43023	0.056829
1888	2015-07-17 04:00:00	3.07208	122	4.37932	0.0565489
1889	2015-07-17 05:00:00	2.92045	126.8	4.32003	0.0575585
1890	2015-07-17 06:00:00	2.76063	131.2	6.6537	0.0566535
1891	2015-07-17 07:00:00	3.57867	105.6	8.40095	0.055051
1892	2015-07-17 08:00:00	2.00043	102	8.74403	0.0550862
1893	2015-07-17 09:00:00	1.564	104.5	10.1042	0.0549495
1894	2015-07-17 10:00:00	4.45078	121.8	10.1132	0.056543
1895	2015-07-17 11:00:00	5.94403	109.1	6.67478	0.057259
1896	2015-07-17 12:00:00	6.83032	116.5	7.214	0.0572739
1897	2015-07-17 13:00:00	8.61748	106.2	7.4334	0.0563013
1898	2015-07-17 14:00:00	8.52125	117.4	8.48223	0.0557242
1899	2015-07-17 15:00:00	6.78802	122.9	9.80317	0.0556167
1900	2015-07-17 16:00:00	6.77093	111.2	9.1635	0.0558753
1901	2015-07-17 17:00:00	8.29845	113	7.91025	0.0547183
1902	2015-07-17 18:00:00	6.90503	115.4	7.50637	0.0553615
1903	2015-07-17 19:00:00	4.90065	113.7	5.66182	0.0566279
1904	2015-07-17 20:00:00	3.52452	120.1	5.80718	0.0567311
1905	2015-07-17 21:00:00	3.20505	113.7	5.32292	0.0569511
1906	2015-07-17 22:00:00	2.61345	120.4	4.69042	0.0567363
1907	2015-07-17 23:00:00	3.05083	121.3	3.89218	0.057752
1908	2015-07-18	1.70228	156.6	3.7295	0.0573306
1909	2015-07-18 01:00:00	1.8104	126.6	3.50937	0.0581046
1910	2015-07-18 02:00:00	1.77778	96.4	4.13517	0.0571894
1911	2015-07-18 03:00:00	0.5944	231	6.42713	0.0527406
1912	2015-07-18 04:00:00	3.46668	117.8	6.52457	0.0553349
1913	2015-07-18 05:00:00	6.10815	114.7	5.3047	0.0565467
1914	2015-07-18 06:00:00	8.50037	108	5.22635	0.0559655
1915	2015-07-18 07:00:00	9.772	109	6.94143	0.0554314
1916	2015-07-18 08:00:00	10.182	111.8	7.25535	0.0554429
1917	2015-07-18 09:00:00	10.6085	113.3	7.4871	0.0546862
1918	2015-07-18 10:00:00	8.86645	108.5	7.83657	0.0563032
1919	2015-07-18 11:00:00	8.01142	102.9	7.83895	0.0565323
1920	2015-07-18 12:00:00	7.33685	99.5	8.24328	0.0573201
1921	2015-07-18 13:00:00	5.33552	98.1	8.01827	0.0578097
1922	2015-07-18 14:00:00	5.69107	100.9	8.09583	0.0568696
1923	2015-07-18 15:00:00	3.54093	95.7	6.88993	0.0567728
1924	2015-07-18 16:00:00	2.2647	74.2	8.04272	0.0567043
1925	2015-07-18 17:00:00	4.2698	99.8	7.48532	0.0562044
1926	2015-07-18 18:00:00	4.44632	99.3	7.47495	0.0558577
1927	2015-07-18 19:00:00	6.75818	112.6	5.84768	0.0554334
1928	2015-07-18 20:00:00	7.48518	113.1	4.80043	0.0560344
1929	2015-07-18 21:00:00	5.58522	115.9	4.1963	0.0563782
1930	2015-07-18 22:00:00	5.10247	112.5	2.88573	0.0564872
1931	2015-07-18 23:00:00	3.83935	115.8	2.699	0.0570275
1932	2015-07-19	2.26307	128.5	2.78217	0.0578085
1933	2015-07-19 01:00:00	1.5577	199.4	3.26397	0.0565794
1934	2015-07-19 02:00:00	0.573517	71.4	2.73297	0.0560938
1935	2015-07-19 03:00:00	0.5518	132.5	3.2962	0.0573326
1936	2015-07-19 04:00:00	2.85368	117.7	3.44003	0.0564848
1937	2015-07-19 05:00:00	1.88537	113.5	3.84612	0.0569491
1938	2015-07-19 06:00:00	1.3045	112.3	4.64242	0.0568154
1939	2015-07-19 07:00:00	1.42948	111.3	4.21717	0.0561253
1940	2015-07-19 08:00:00	1.58078	92.8	4.07357	0.0571417
1941	2015-07-19 09:00:00	0.901667	83	4.95085	0.0571088
1942	2015-07-19 10:00:00	0.737217	41.5	5.22063	0.0566648
1943	2015-07-19 11:00:00	0.89445	59.6	5.54643	0.0553731
1944	2015-07-19 12:00:00	0.633817	31.5	6.16103	0.0552627
1945	2015-07-19 13:00:00	0.676317	24.5	5.77398	0.0548304
1946	2015-07-19 14:00:00	1.31652	49.7	4.73415	0.0570028
1947	2015-07-19 15:00:00	0.9741	67.7	4.94242	0.0565964
1948	2015-07-19 16:00:00	1.63422	10.5	5.27233	0.0562717
1949	2015-07-19 17:00:00	3.83587	338.8	5.03512	0.0572142
1950	2015-07-19 18:00:00	4.41582	326.9	4.8754	0.0563087
1951	2015-07-19 19:00:00	4.346	328.4	4.64267	0.0570104
1952	2015-07-19 20:00:00	3.2099	345.8	5.38108	0.0553108
1953	2015-07-19 21:00:00	1.10413	58.7	4.53275	0.053083
1954	2015-07-19 22:00:00	0.752267	70.5	3.58848	0.0527274
1955	2015-07-19 23:00:00	0.398583	156.3	1.6933	0.0562146
1956	2015-07-20	0.630017	216.2	0.8209	0.0574683
1957	2015-07-20 01:00:00	0.344683	110.6	1.41437	0.0560501
1958	2015-07-20 02:00:00	0.3941	233.8	2.15835	0.0572043
1959	2015-07-20 03:00:00	0.287933	81	5.18097	0.0516569
1960	2015-07-20 04:00:00	0.625417	99.5	6.0315	0.0517374
1961	2015-07-20 05:00:00	1.76553	96.1	5.62162	0.0546461
1962	2015-07-20 06:00:00	1.36837	105	6.85068	0.0541278
1963	2015-07-20 07:00:00	2.18213	95.3	7.09533	0.0560112
1964	2015-07-20 08:00:00	2.1029	95.9	7.72172	0.0557164
1965	2015-07-20 09:00:00	1.99473	94.8	8.637	0.0551745
1966	2015-07-20 10:00:00	2.29825	88.1	8.63383	0.0568085
1967	2015-07-20 11:00:00	2.49538	83.9	9.33183	0.058053
1968	2015-07-20 12:00:00	1.89648	62.4	9.93233	0.055842
1969	2015-07-20 13:00:00	1.65142	57.1	9.39433	0.0553292
1970	2015-07-20 14:00:00	1.49555	59.7	9.67083	0.0540203
1971	2015-07-20 15:00:00	1.16933	42.9	9.75083	0.0533483
1972	2015-07-20 16:00:00	1.0498	50.2	9.844	0.0539793
1973	2015-07-20 17:00:00	1.98277	87.6	8.6336	0.0539431
1974	2015-07-20 18:00:00	2.08	91.4	7.78797	0.055945
1975	2015-07-20 19:00:00	1.40962	90.7	7.40167	0.0556895
1976	2015-07-20 20:00:00	0.81835	72.1	6.8623	0.0526948
1977	2015-07-20 21:00:00	0.748983	62.5	4.75047	0.0536455
1978	2015-07-20 22:00:00	0.708533	104.4	3.74603	0.0560643
1979	2015-07-20 23:00:00	0.9173	71	3.67188	0.0556725
1980	2015-07-21	0.431733	70.7	3.57303	0.0541709
1981	2015-07-21 01:00:00	0.540633	95.7	3.61715	0.0550232
1982	2015-07-21 02:00:00	0.925417	136.8	3.58298	0.0553873
1983	2015-07-21 03:00:00	1.45925	94.5	3.76107	0.0553851
1984	2015-07-21 04:00:00	0.282833	71.5	4.35348	0.0550898
1985	2015-07-21 05:00:00	0.53875	30.9	5.1111	0.0541525
1986	2015-07-21 06:00:00	0.806467	35.3	7.00428	0.0529875
1987	2015-07-21 07:00:00	1.33893	52.5	6.44725	0.054057
1988	2015-07-21 08:00:00	1.39883	43.7	6.77113	0.0550898
1989	2015-07-21 09:00:00	1.42518	28.4	7.40647	0.0549689
1990	2015-07-21 10:00:00	2.2068	24.3	7.04315	0.0567702
1991	2015-07-21 11:00:00	1.49858	45.3	7.78362	0.0554137
1992	2015-07-21 12:00:00	1.5854	36.7	7.13815	0.0562779
1993	2015-07-21 13:00:00	1.84192	15.6	6.57425	0.0563619
1994	2015-07-21 14:00:00	1.501	55.3	7.76712	0.0552317
1995	2015-07-21 15:00:00	2.55293	87.7	8.567	0.0579216
1996	2015-07-21 16:00:00	4.82113	108.4	8.5613	0.0561881
1997	2015-07-21 17:00:00	5.78518	113.4	7.86188	0.0562067
1998	2015-07-21 18:00:00	5.66295	115.2	5.91775	0.0564732
1999	2015-07-21 19:00:00	5.49245	109.6	5.50372	0.0577752
[truncated: 2,223 more rows]
